# Supplementary material
Source: PubMed Central journal article supplement (PMC5096378)
Supplement: NIHMS826341-supplement-Supporting_Information.pdf [file NIHMS826341-supplement-Supporting_Information.pdf]

# Supporting Information

## **Modular Terpenoid Construction *via* Catalytic Enantioselective Formation of All-Carbon Quaternary Centers: Total Synthesis of Oridamycin A, Triptoquinone B and C and Isoiresin**

Jiajie Feng, Florian Noack and Michael J. Krische

*University of Texas at Austin, Department of Chemistry,  
Austin, TX 78712, USA*

### **Table of Contents:**

|                                                                                                               |             |
|---------------------------------------------------------------------------------------------------------------|-------------|
| <b>Summaries of Prior Syntheses of Oridamycins, Xiamycins, Triptoquinones, Isoiresin and Iresin.....</b>      | <b>S2</b>   |
| <b>General Information.....</b>                                                                               | <b>S13</b>  |
| <b>Spectroscopy, Spectrometry, and Data Collection.....</b>                                                   | <b>S13</b>  |
| <b>Detailed Procedures and Spectral Data for Asymmetric Synthesis of Oridamycin A.....</b>                    | <b>S14</b>  |
| <b>Detailed Procedures and Spectral Data for Asymmetric Synthesis of Triptoquinone C....</b>                  | <b>S33</b>  |
| <b>Detailed Procedures and Spectral Data for Asymmetric Synthesis of Isoiresin.....</b>                       | <b>S41</b>  |
| <b>Comparison of NMR Data between Natural and Synthetic Oridamycin A, Triptoquinone C and Isoiresin .....</b> | <b>S53</b>  |
| <b>Crystallographic Material for 5.....</b>                                                                   | <b>S59</b>  |
| <b>References .....</b>                                                                                       | <b>S127</b> |

## Summaries of Prior Syntheses of Oridamycins, Xiamycins, Tryptoquinones, Isoiresin and Iresin

A. Li *et al.* *Nat. Commun.* **2015**, 6, 6096. (racemic)

### Fragment 1

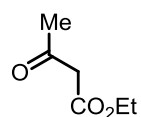

a, b

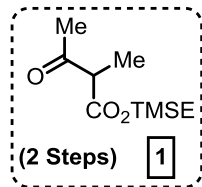

### Fragment 2

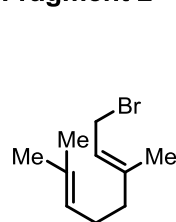

c

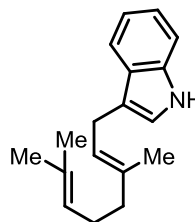

d, e, f

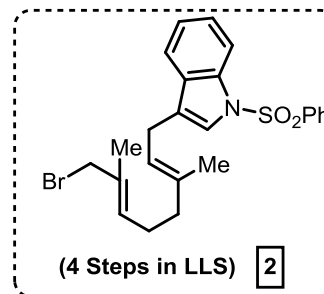

Key: (a) TMSEOH; (b) MeI, K<sub>2</sub>CO<sub>3</sub>; (c) Indole, NH<sub>4</sub>HCO<sub>3</sub>; (d) PhSO<sub>2</sub>Cl, TBAB, NaOH; (e) SeO<sub>2</sub>, TBHP; (f) MsCl, Et<sub>3</sub>N, LiBr.

### Fragment Union and End Game

**1** **2**

a

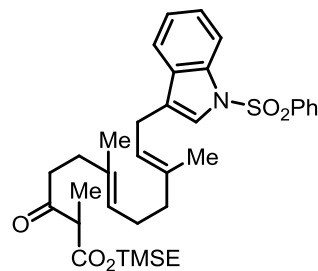

b

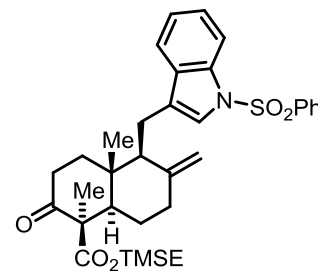

c, d

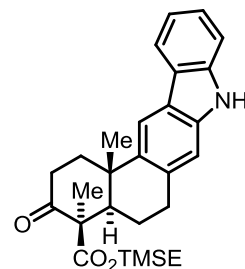

e, f

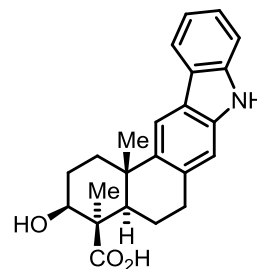

(±)-Oridamycin A  
10 LLS 12 TS

Key: (a) KH, then *n*BuLi, HMPA; (b) Mn(OAc)<sub>3</sub>·3H<sub>2</sub>O, Cu(OAc)<sub>2</sub>·2H<sub>2</sub>O; (c) Mg, NH<sub>4</sub>Cl; (d) Pd(OAc)<sub>2</sub>, 1,4-benzoquinone; (e) NaBH<sub>4</sub>, CeCl<sub>3</sub>·7H<sub>2</sub>O; (f) TASf.

B. Trotta *Org. Lett.* **2015**, *17*, 3358. (racemic)

### Fragment 1

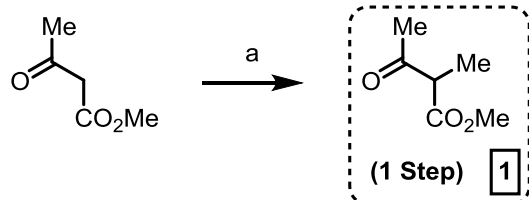

### Fragment 2

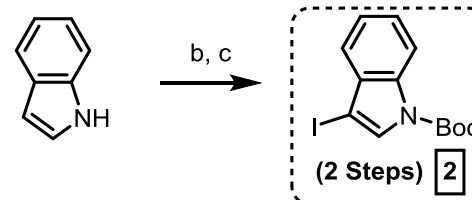

Key: (a) MeI, K<sub>2</sub>CO<sub>3</sub>; (b) KOH, I<sub>2</sub>; (c) Boc<sub>2</sub>O, Et<sub>3</sub>N, DMAP.

### Fragment Union and End Game

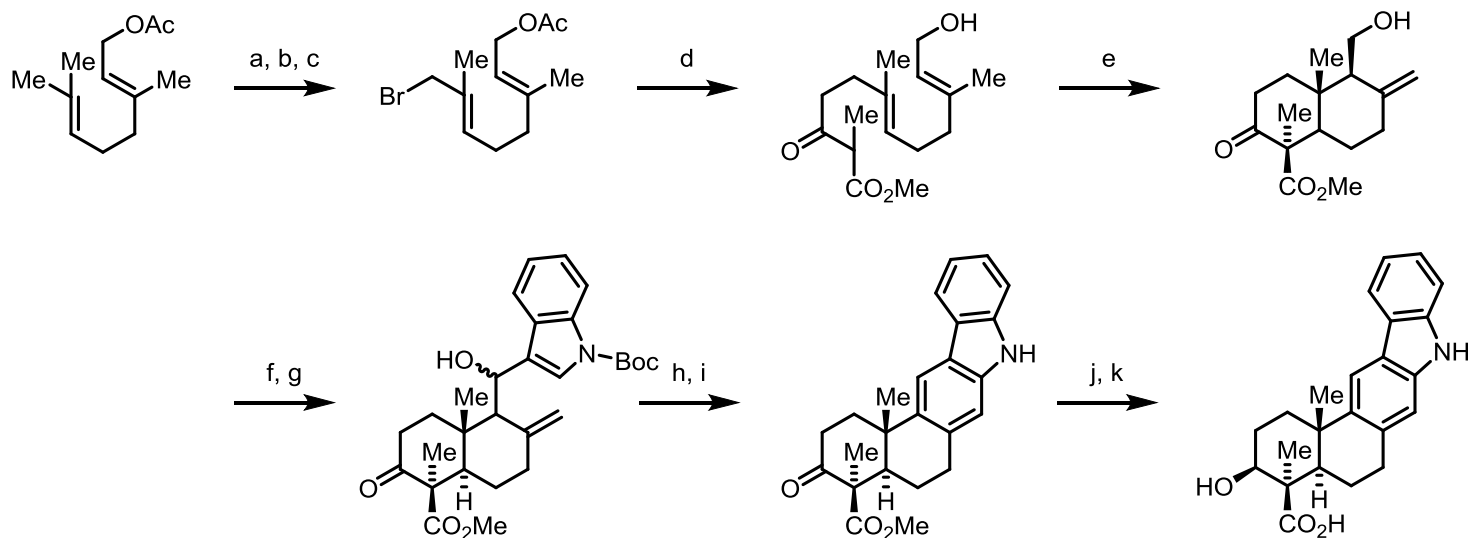

Key: (a) SeO<sub>2</sub>; (b) NaBH<sub>4</sub>; (c) MsCl, Et<sub>3</sub>N, LiBr; (d) **1**, NaH, then *n*BuLi, HMPA; (e) Mn(OAc)<sub>3</sub>·3H<sub>2</sub>O, Cu(OAc)<sub>2</sub>·2H<sub>2</sub>O; (f) DMP; (g) **2**, EtMgBr; (h) TFA; (i) Air, then TFA; (j) NaBH<sub>4</sub>; (k) NaCN.

C. Li *et al.* *Nat. Commun.* **2015**, *6*, 6096. (racemic)

### Fragment 1

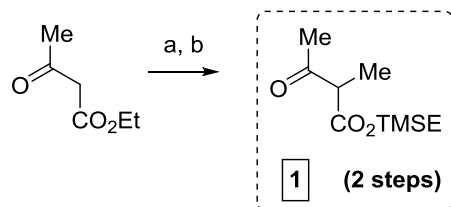

Key: a) TMSEOH; b) MeI, K<sub>2</sub>CO<sub>3</sub>.

### Completion of Synthesis

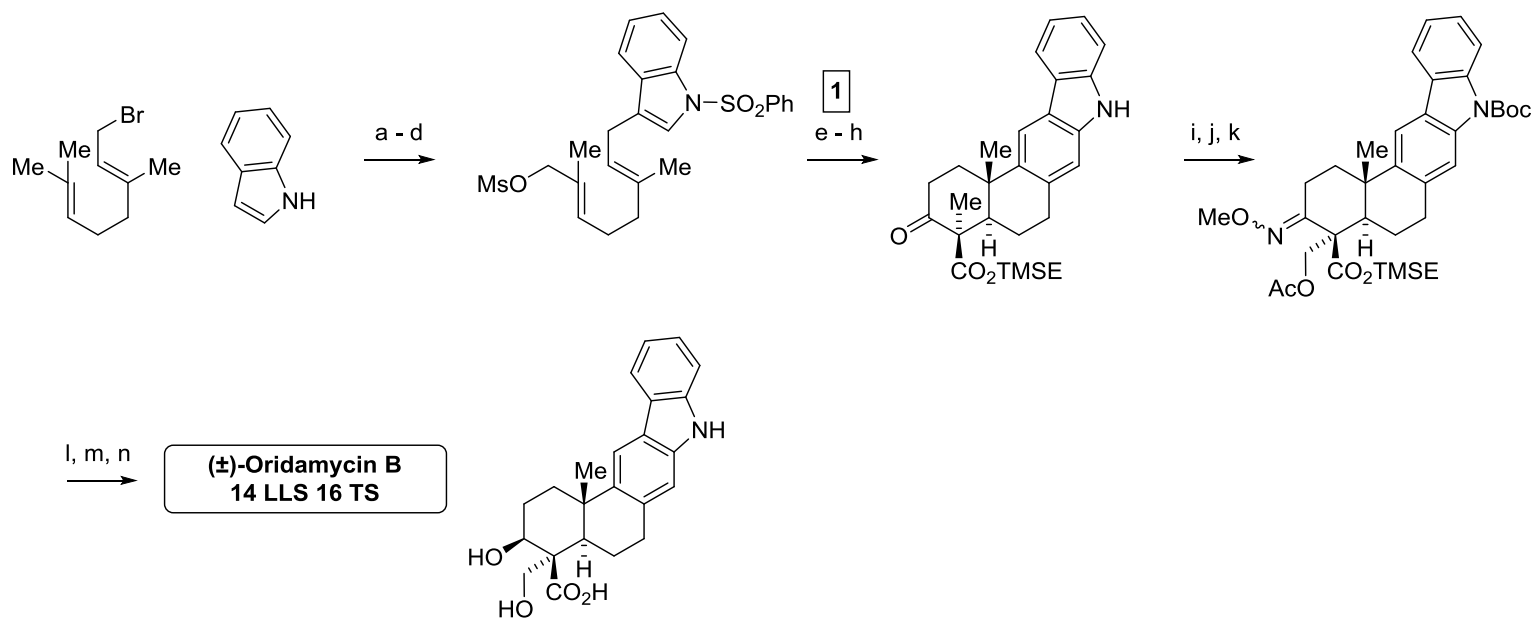

Key: a) NH<sub>4</sub>HCO<sub>3</sub>; b) PhSO<sub>2</sub>Cl, TBAB, NaOH; c) SeO<sub>2</sub>, TBHP; d) MsCl, NEt<sub>3</sub>, LiBr; e) **1**, KH, then *n*-BuLi; f) Mn(OAc)<sub>3</sub>·2H<sub>2</sub>O, Cu(OAc)<sub>2</sub>·H<sub>2</sub>O; g) Mg, NH<sub>4</sub>Cl; h) Pd(OAc)<sub>2</sub>, benzoquinone; i) NH<sub>2</sub>OMe; j) Boc<sub>2</sub>O, DMAP; k) Pd(OAc)<sub>2</sub>, PhI(OAc)<sub>2</sub>; l) HClO<sub>4</sub>; m) NaBH<sub>4</sub>; n) TASF.

D. Trotta *Org. Lett.* **2015**, *17*, 3358. (racemic)

### Fragments 1

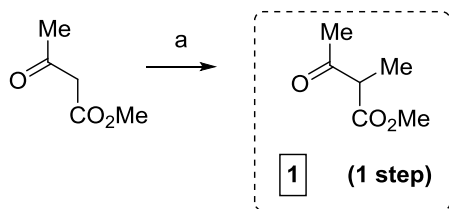

Key: a) MeI, K<sub>2</sub>CO<sub>3</sub>.

### Fragments 2

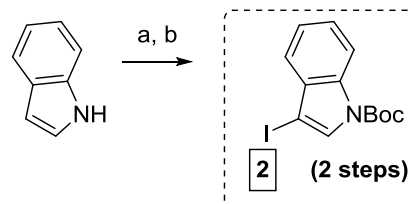

Key: a) KOH, I<sub>2</sub>; b) Boc<sub>2</sub>O, Et<sub>3</sub>N, DMAP.

### Completion of Synthesis

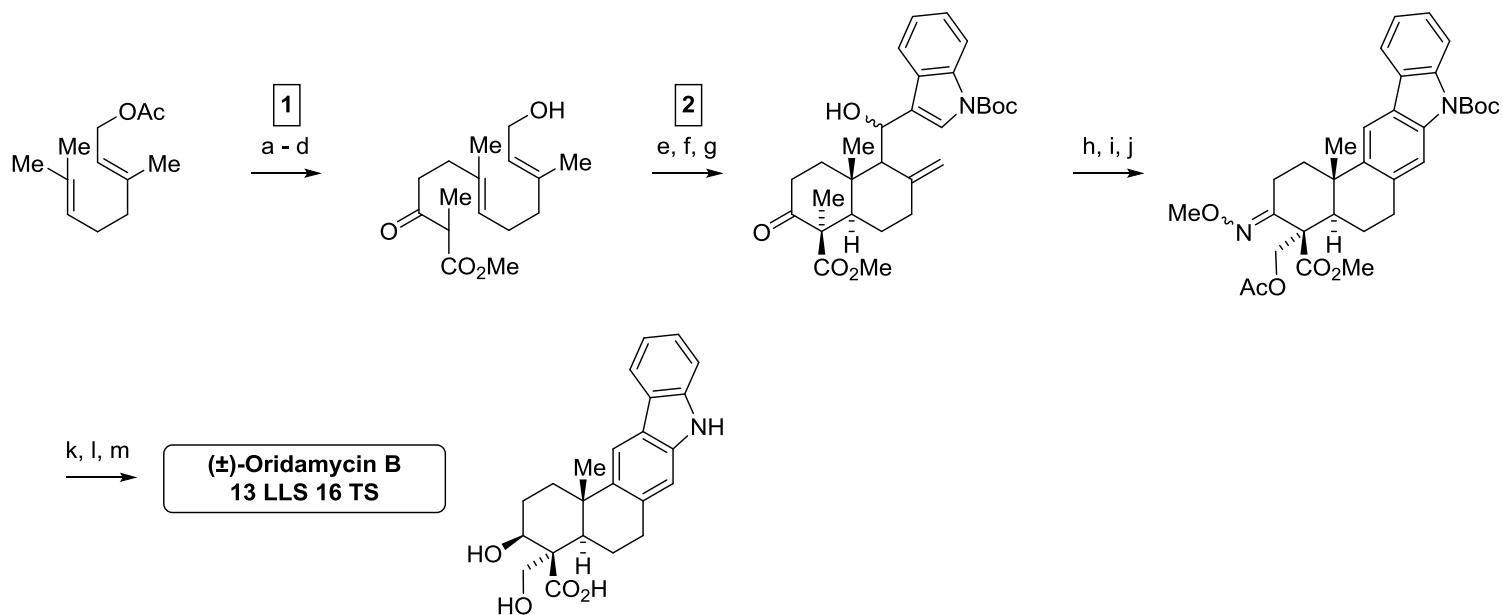

Key: a) SeO<sub>2</sub>; b) NaBH<sub>4</sub>; c) MsCl, NEt<sub>3</sub>, then LiBr; d) **1**, NaH, then *n*-BuLi; e) Mn(OAc)<sub>2</sub>, Cu(OAc)<sub>2</sub>; f) DMP; g) **2**, EtMgBr; h) TFA; i) MeONH<sub>2</sub>-HCl, pyridine; j) Pd(OAc)<sub>2</sub>, PhI(OAc)<sub>2</sub>; k) HCl; l) NaBH<sub>4</sub>; m) NaCN.

E. Baran *et al.* *J. Am. Chem. Soc.* **2014**, *136*, 5571.

### Fragment 1

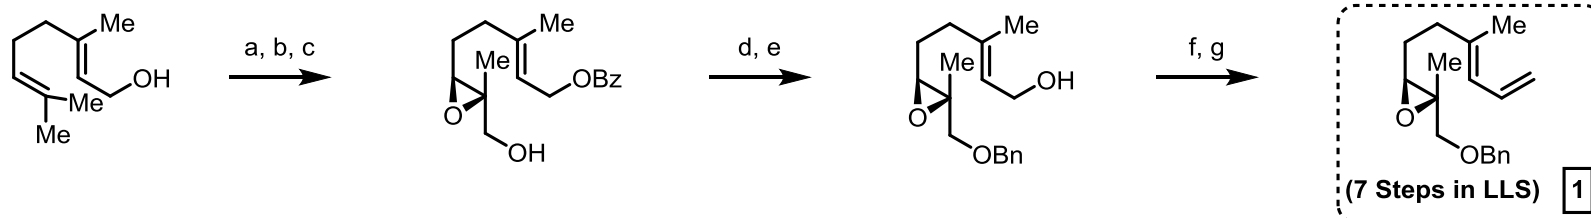

Key: (a) BzCl, py, DMAP; (b) SeO<sub>2</sub>, TBHP; (c) (+)-DIPT, Ti(O*i*Pr)<sub>4</sub>, TBHP, 3A MS; (d) BnBr, NaH, TBAI; (e) NaOMe, TBAI; (f) SO<sub>3</sub>•py, Et<sub>3</sub>N; (g) Ph<sub>3</sub>PMel, *n*BuLi.

### Fragment Union and End Game

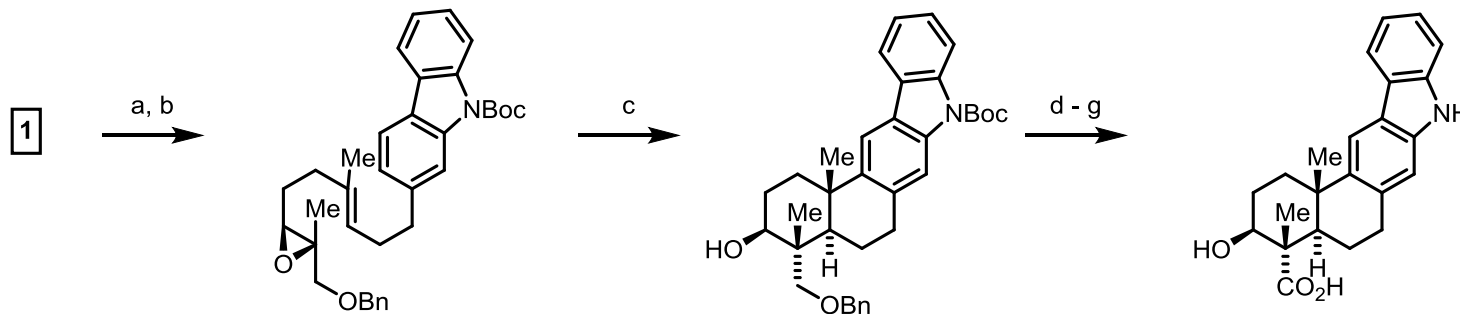

Key: (a) **1**, 9-BBN, then 2-bromo-9H-carbazole, Pd(dppf)Cl<sub>2</sub>, NaOH; (b) Boc<sub>2</sub>O, Et<sub>3</sub>N, DMAP; (c) BF<sub>3</sub>•OEt<sub>2</sub>; (d) H<sub>2</sub>, Pd(OH)<sub>2</sub>/C; (e) TEMPO, NCS, TBAI, NaHCO<sub>3</sub>/KHCO<sub>3</sub>; (f) NaClO<sub>2</sub>, NaH<sub>2</sub>PO<sub>4</sub>•H<sub>2</sub>O, 2-methyl-2-butene; (g) EtOH, H<sub>2</sub>O.



### Fragment 1

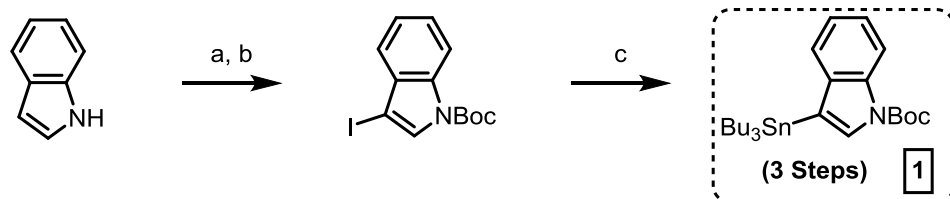

Key: (a) ICl, py; (b) Boc<sub>2</sub>O, DMAP; (c) *n*BuLi, TMEDA, then Bu<sub>3</sub>SnCl.

### Completion of Synthesis

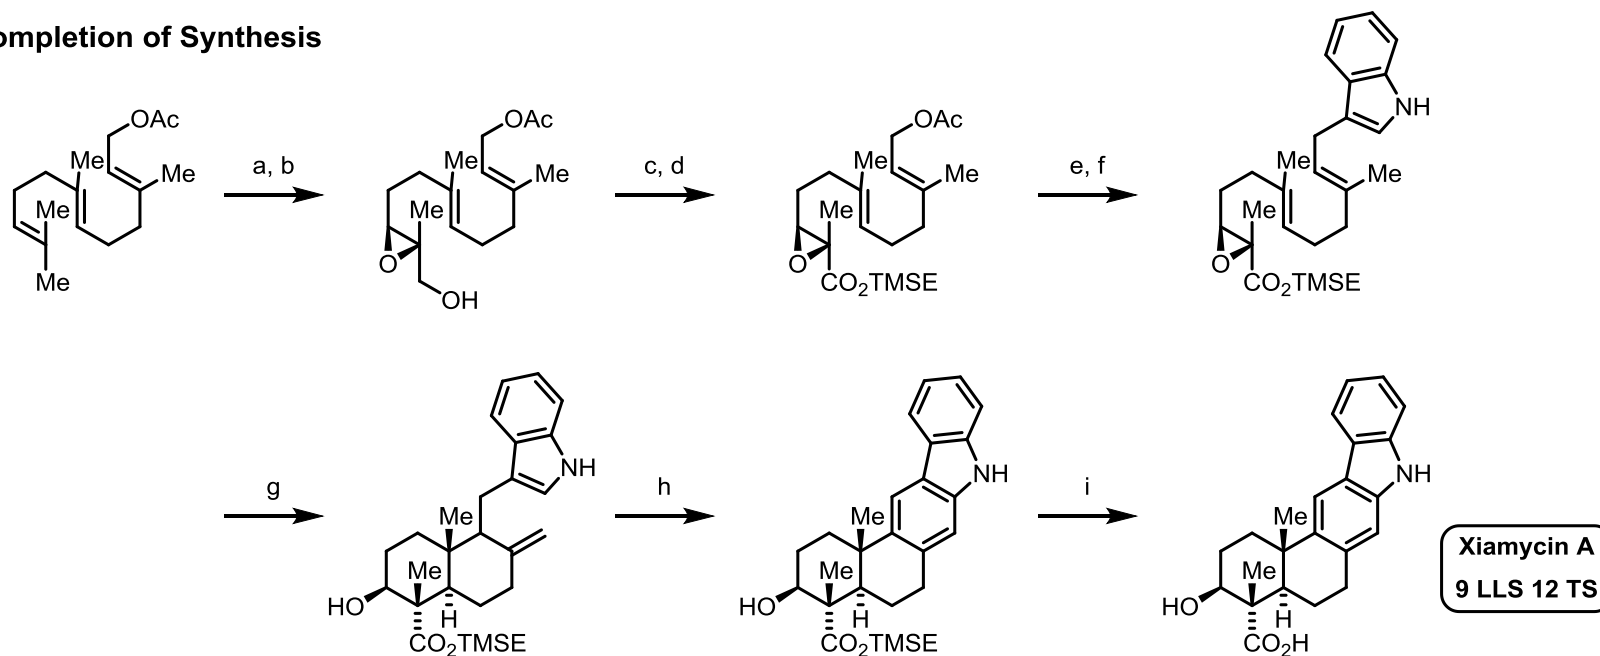

Key: (a) SeO<sub>2</sub>, TBHP; (b) (+)-DET, Ti(O*i*Pr)<sub>4</sub>, TBHP; (c) AZADO, PhI(OAc)<sub>2</sub>; (d) TMSEOH, EDC•HCl; (e) **1**, Pd<sub>2</sub>(dba)<sub>3</sub>, LiCl; (f) DMSO, 150 °C; (g) Cp<sub>2</sub>TiCl<sub>2</sub>, Mn, DIPEA, TMSCl; (h) Pd(OAc)<sub>2</sub>, 1,4-benzoquinone, AcOH; (i) TASF.



G. Shishido *et al.* *J. Chem. Soc., Chem. Commun.* **1993**, 793. (racemic)

### Completion of Synthesis

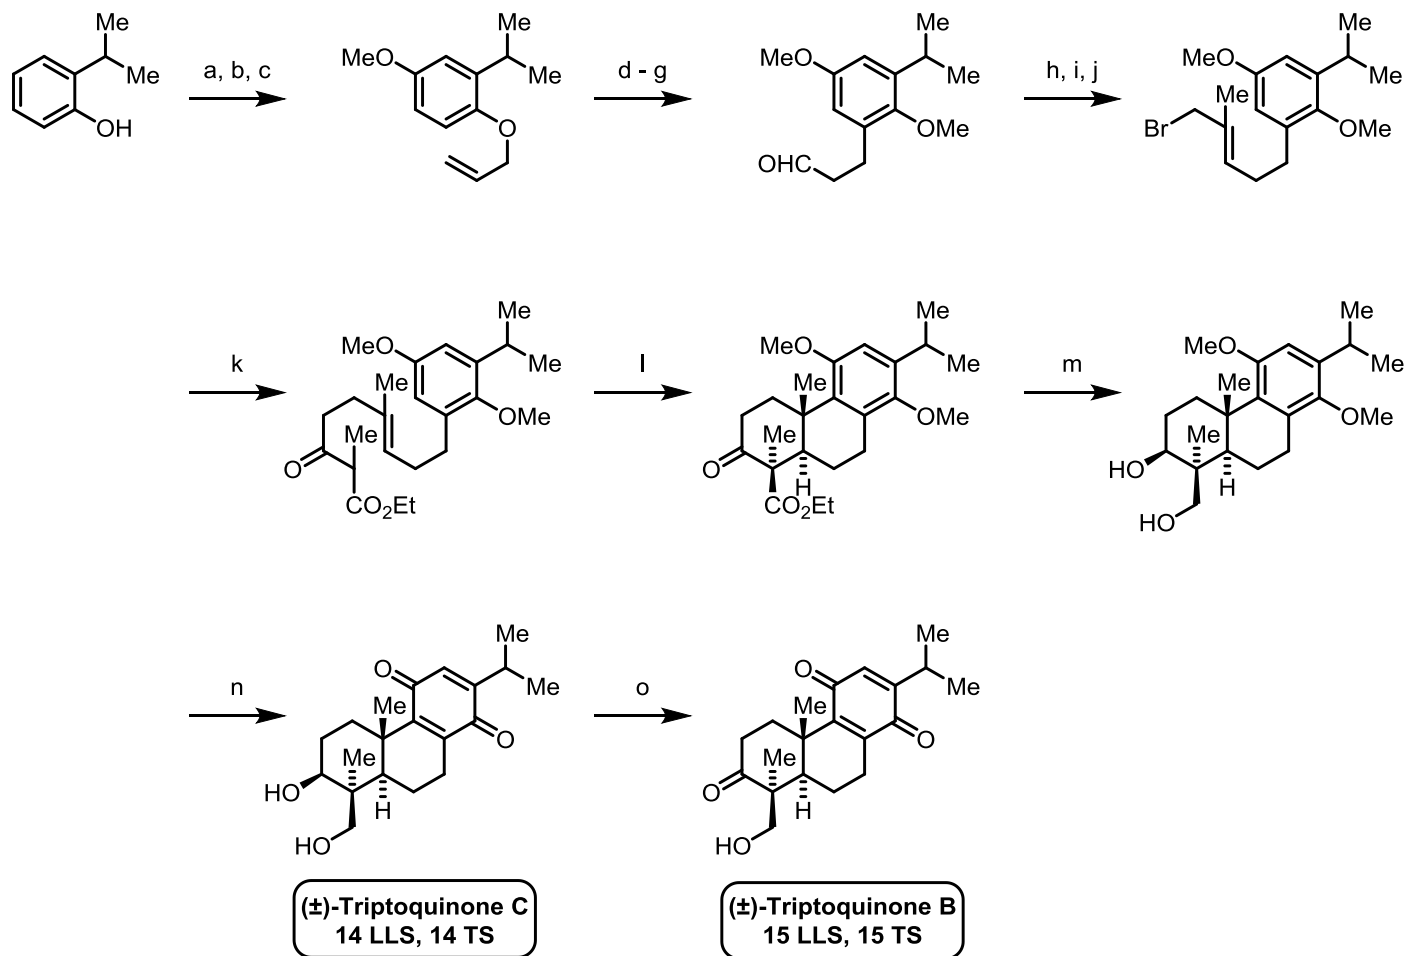

Key: (a) Br<sub>2</sub>; (b) Allyl bromide, K<sub>2</sub>CO<sub>3</sub>; (c) NaOMe, CuI, MeOH; (d) 200 °C; (e) Me<sub>2</sub>SO<sub>4</sub>, K<sub>2</sub>CO<sub>3</sub>; (f) BH<sub>3</sub>·SMe<sub>2</sub>, then H<sub>2</sub>O<sub>2</sub>, NaOH; (g) (COCl)<sub>2</sub>, DMSO, Et<sub>3</sub>N; (h) PPh<sub>3</sub>=C(Me)CO<sub>2</sub>Et; (i) DIBAL; (j) PPh<sub>3</sub>, CBr<sub>4</sub>; (k) Ethyl methylacetoacetate, NaH, *n*BuLi, HMPA; (l) Mn(OAc)<sub>3</sub>, AcOH; (m) LiAlH<sub>4</sub>; (n) (NH<sub>4</sub>)<sub>2</sub>Ce(NO<sub>3</sub>)<sub>6</sub>; (o) 7% NaClO (aq.), AcOH.

H. Shishido *et al. Tetrahedron Lett.* **1997**, *38*, 4121.

### Completion of Synthesis

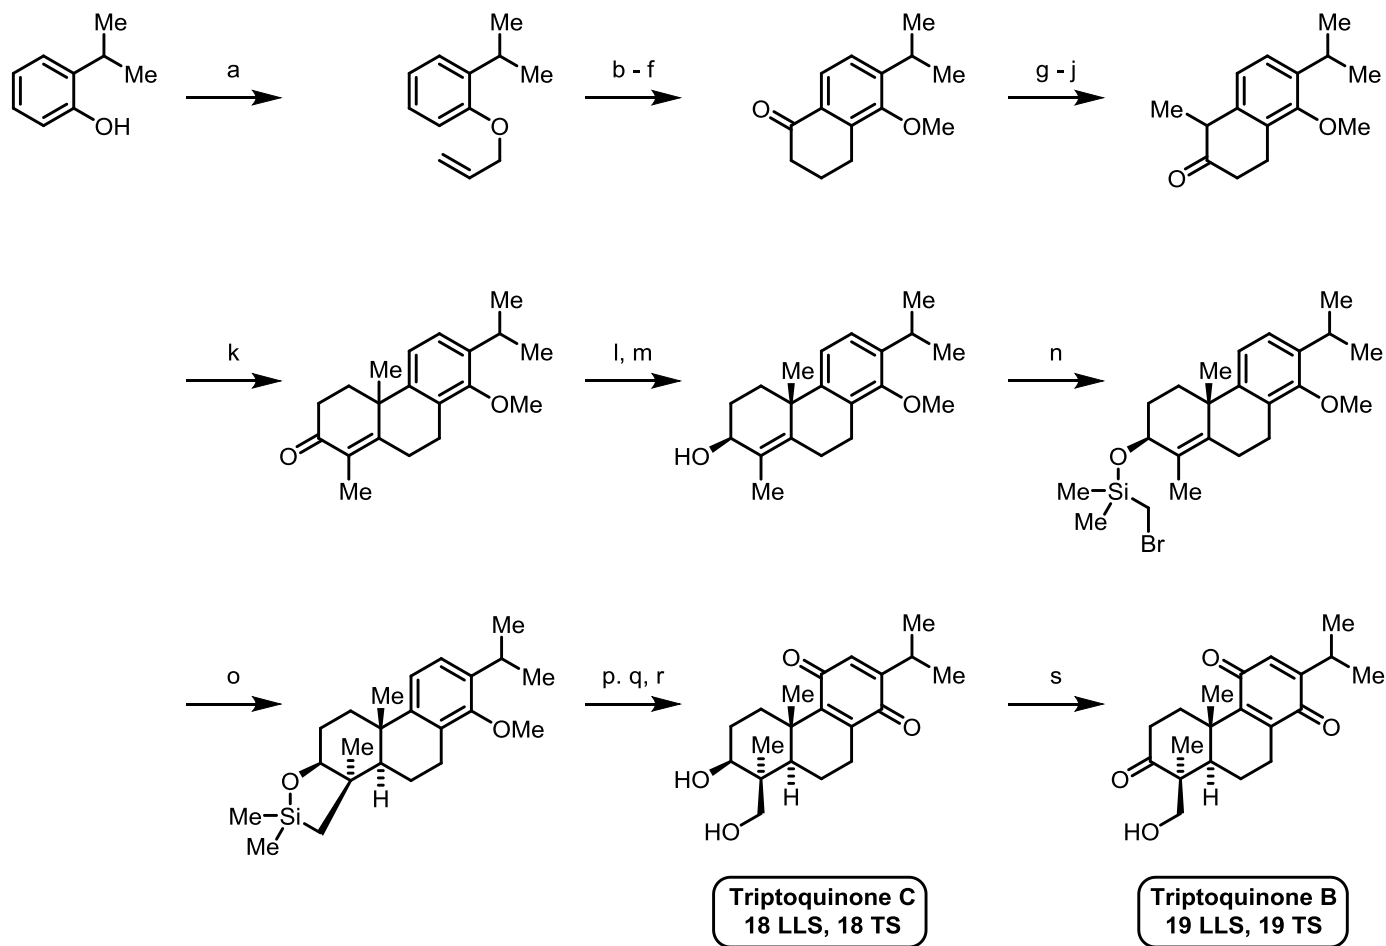

Key: (a) Allyl bromide,  $K_2CO_3$ ; (b)  $200\text{ }^\circ\text{C}$ ; (c)  $Me_2SO_4$ ,  $K_2CO_3$ ; (d) 9-BBN, CO,  $LiAlH(OtBu)_3$ , then  $H_2O_2$ ,  $NaH_2PO_4$ ,  $K_2HPO_4 \cdot 2H_2O$ ; (e)  $H_2NSO_3H$ ,  $NaClO_2$ ; (f) PPA; (g)  $MeMgI$ ; (h) *p*-TsOH; (i)  $BH_3 \cdot SMe_2$ , then  $H_2O_2$ , NaOH; (j)  $(COCl)_2$ , DMSO,  $Et_3N$ ; (k) EVK, KOH; (l)  $NaBH_4$ ,  $CeCl_3$ ; (m) NOVOZYM 435, vinyl acetate; (n)  $BrCH_2SiMe_2Cl$ ,  $Et_3N$ ; (o)  $NaBH_3CN$ ,  $Bu_3SnCl$ , AIBN; (p)  $Na_2CO_3$ ,  $H_2O_2$ ; (q) EtSH,  $AlCl_3$ ; (r)  $(KSO_3)_2NO$ ,  $KH_2PO_4$ ; (s) 7% NaClO (aq.), AcOH.

I. Pelletier *et al.* *J. Am. Chem. Soc.* **1968**, *90*, 5318.

### Completion of Synthesis

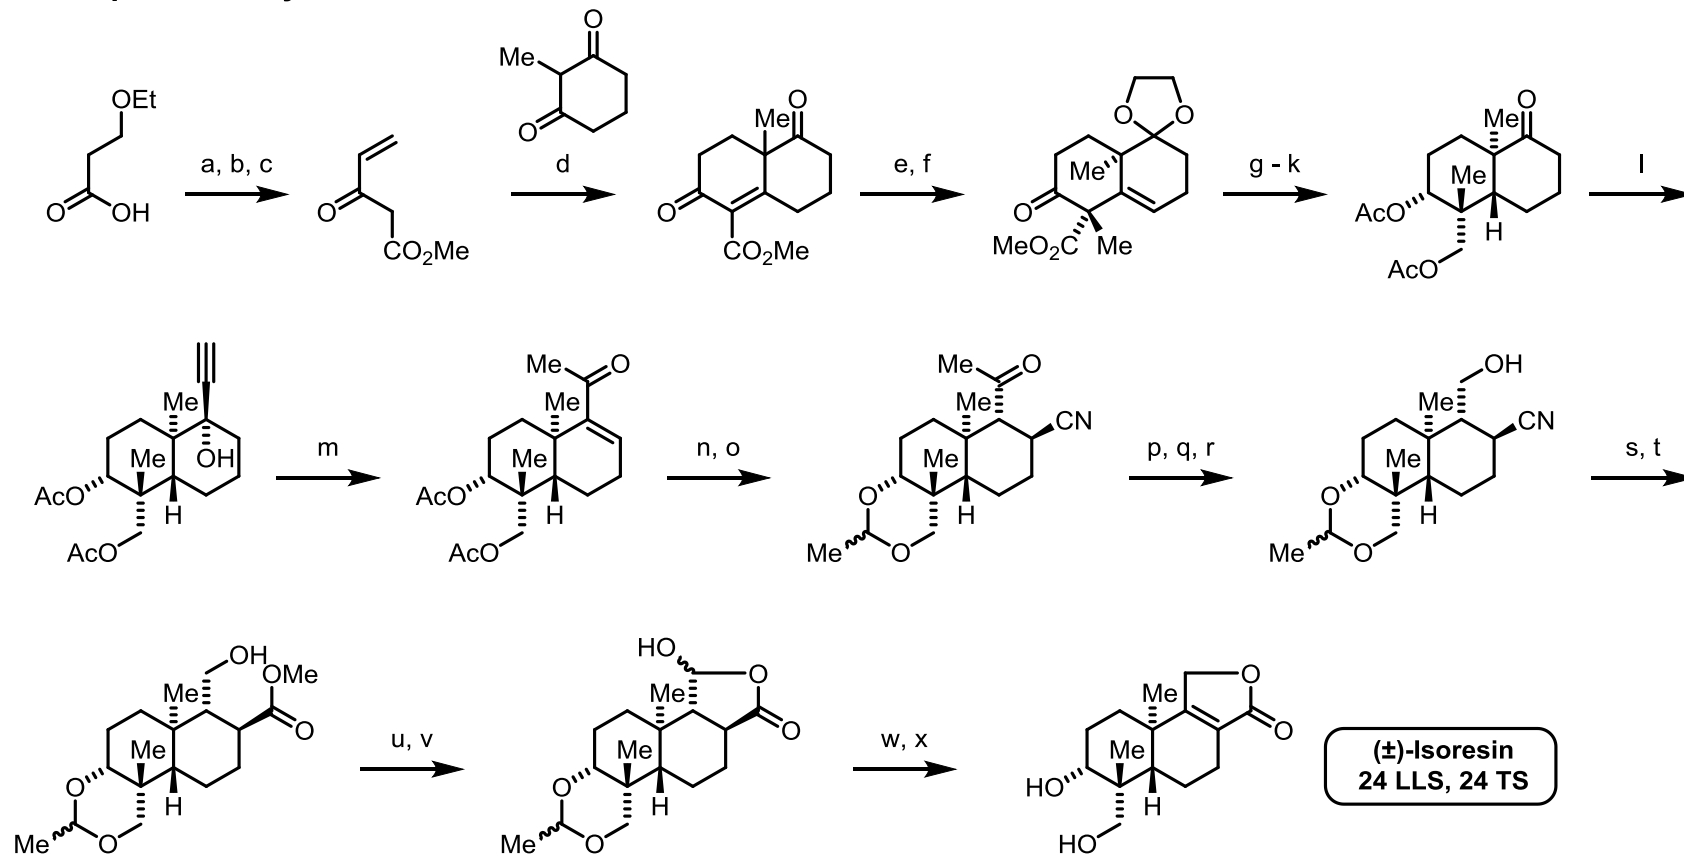

Key: (a)  $\text{SOCl}_2$ ; (b) NaH, methyl acetoacetate, then  $\text{NH}_3$  (g); (c) PTSA; (d) KF, MeOH; (e) PTSA; (f) *t*-BuOK, MeI; (g)  $\text{NaBH}_4$ ; (h)  $\text{H}_2$ , Pd/C; (i)  $\text{LiAlH}_4$ ; (j)  $\text{Ac}_2\text{O}$ , pyridine; (k) PTSA, acetone- $\text{H}_2\text{O}$ ; (l)  $\text{C}_2\text{H}_2$ ,  $\text{NaNH}_2$ ; (m)  $\text{HCO}_2\text{H}$ ; (n) NaCN, EtOH; (o)  $\text{CH}_3\text{CHO}$ ,  $\text{ZnCl}_2$ ; (p) NaBrO; (q) base,  $(\text{COCl})_2$ ; (r)  $\text{LiAl}(\text{O}t\text{-Bu})_3\text{H}$ ; (s) base,  $\text{H}_2\text{O}$ ; (t)  $\text{CH}_2\text{N}_2$ ; (u) DCC, DMSO; (v)  $\text{K}_2\text{CO}_3$ , MeOH; (w)  $\text{Al}_2\text{O}_3$ -pyridine, 235 °C; (x) acid,  $\text{H}_2\text{O}$ .

**Completion of Synthesis**

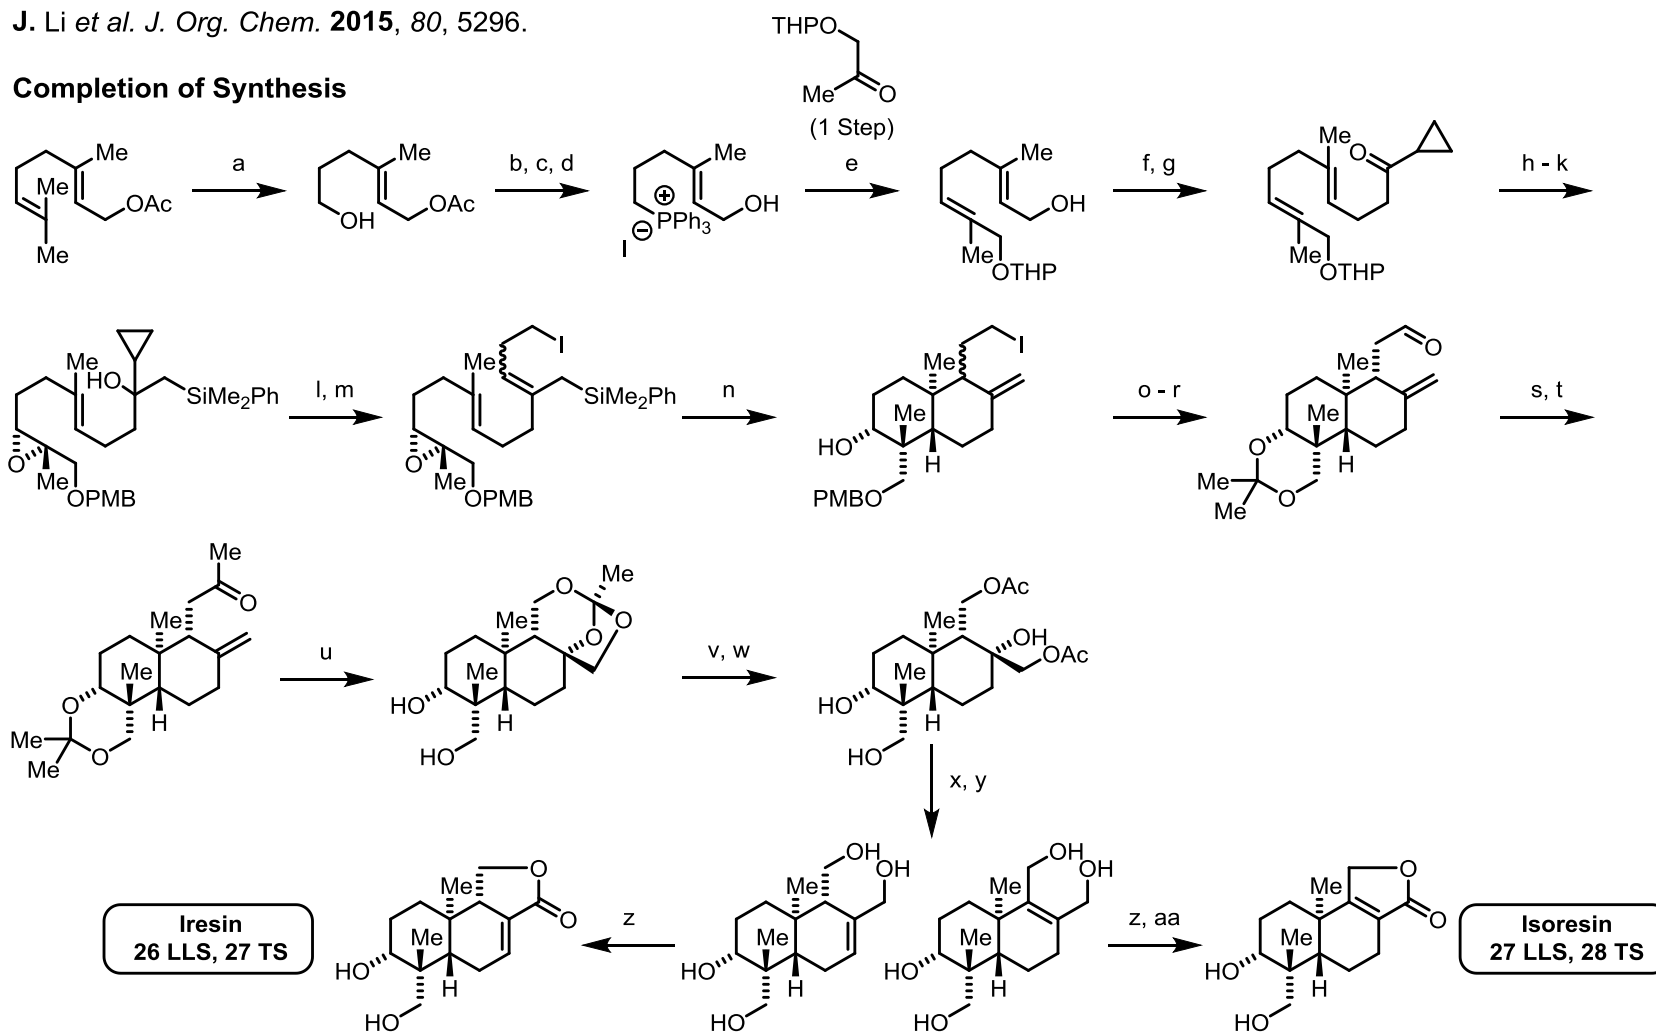

Key: (a) O<sub>3</sub>, pyridine, then NaBH<sub>4</sub>, MeOH; (b) I<sub>2</sub>, Ph<sub>3</sub>P, imid; (c) K<sub>2</sub>CO<sub>3</sub>, MeOH; (d) PPh<sub>3</sub>; (e) *n*-BuLi; (f) I<sub>2</sub>, Ph<sub>3</sub>P, imid; (g) cyclopropyl methyl ketone, LDA; (h) PTSA; (i) Ti(O-*i*-Pr)<sub>4</sub>, L-(+)-DIPT, *t*-BuOOH, CaH<sub>2</sub>, silica gel, 4A MS; (j) PMBBBr, NaH, TBAI; (k) PhMe<sub>2</sub>SiCH<sub>2</sub>MgCl, CeCl<sub>3</sub>; (l) MgI<sub>2</sub>·(OEt<sub>2</sub>)<sub>n</sub>; (m) K<sub>2</sub>CO<sub>3</sub>; (n) SnCl<sub>4</sub>; (o) DDQ; (p) K<sub>2</sub>CO<sub>3</sub>; (q) Me<sub>2</sub>C(OMe)<sub>2</sub>, PPTS; (r) DMSO, NaHCO<sub>3</sub>; (s) CH<sub>3</sub>Li; (t) (COCl)<sub>2</sub>, DMSO, Et<sub>3</sub>N; (u) TFAA, H<sub>2</sub>O<sub>2</sub> (50% aq.), NaH<sub>2</sub>PO<sub>4</sub>; (v) 6N HCl; (w) Ac<sub>2</sub>O, DMAP, pyridine; (x) Burgess reagent; (y) NaOMe, MeOH; (z) Ag<sub>2</sub>CO<sub>3</sub>/Celite; (aa) NaBH<sub>4</sub>.

## **General Information**

All reactions were performed under an atmosphere of argon, unless specifically noted in detailed procedures. Tetrahydrofuran, diethyl ether and toluene were distilled from sodium-benzophenone immediately prior to use. Dichloromethane, 1,2-dichloroethane were distilled from calcium hydride prior to use. Anhydrous solvents were transferred by oven-dried syringes and needles. Reagents purchased from commercial sources were used as received, or purified via Hickman distillation over appropriate drying agent. Analytical thin-layer chromatography (TLC) was carried out using 0.25 mm commercial silica gel plates (Dynammic Absorbents F<sub>254</sub>). Visualization was accomplished with UV light followed by dipping in appropriate stain solution then heating. Flash column chromatography was performed on Sorbent silica gel (40-63  $\mu\text{m}$ , unless indicated specifically) or Sigma-Aldrich aluminum oxide (activated, neutral, Brockmann I, ~150 mesh, 58 Å pore size).

## **Spectroscopy, Spectrometry, and Data Collection**

Infrared spectra were recorded on a Perkin-Elmer 1600 spectrometer. High-resolution mass spectra (HRMS) were obtained on an Agilent Technologies 6530 Accurate Mass Q-ToF LC/MS instrument for electrospray ionisation (ESI) or a Micromass Autospec Ultima instrument for chemical ionization (CI), and are reported as  $m/z$  (relative intensity). Accurate masses are reported for the molecular ion (M, M+H, M-H or M+Na), or a suitable fragment ion. <sup>1</sup>H Nuclear magnetic resonance spectra were recorded using an Agilent MR (400 MHz), Varian DirectDrive (400, 600 MHz), or Varian INOVA (500 MHz) spectrometer in CDCl<sub>3</sub> or CD<sub>3</sub>OD solution. Coupling constants are reported in Hertz (Hz) with one decimal place, and chemical shifts are reported as parts per million (ppm) relative to residual solvent peaks (CDCl<sub>3</sub>  $\delta_{\text{H}}$  7.26 ppm; CD<sub>3</sub>OD  $\delta_{\text{H}}$  3.31 ppm). <sup>13</sup>C Nuclear magnetic resonance spectra were recorded using an Agilent MR (400 MHz), Varian DirectDrive (400, 600 MHz), or Varian INOVA (500 MHz) spectrometer in CDCl<sub>3</sub> or CD<sub>3</sub>OD solution, and chemical shifts are reported as parts per million (ppm) relative to solvent peaks (CDCl<sub>3</sub>  $\delta_{\text{C}}$  77.0 ppm; CD<sub>3</sub>OD  $\delta_{\text{C}}$  49.0 ppm). Specific optical rotations ( $[\alpha]_{\text{D}}$ ) were obtained on an Atago AP-300 automatic polarimeter at the sodium line (589.3 nm) in CHCl<sub>3</sub> or CH<sub>3</sub>OH solution. Melting points were taken on a Stuart SMP3 melting point apparatus or SRS OptiMelt automated melting point system.

## Detailed Procedures and Spectral Data for Asymmetric Synthesis of Oridamycin A

### (5*S*,6*S*)-5-Hydroxy-6-(hydroxymethyl)-6-methyloct-7-en-2-one (2)

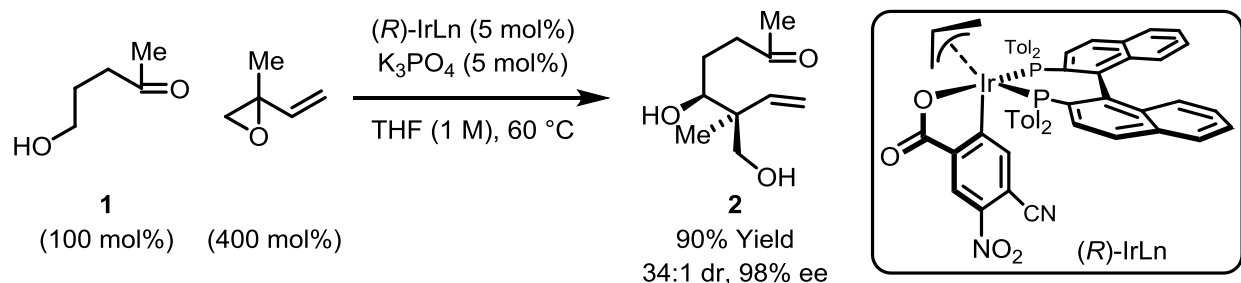

### Detailed Procedures

Catalyst (*R*)-IrLn<sup>1</sup> (0.551 g, 0.5 mmol, 5 mol%) and K<sub>3</sub>PO<sub>4</sub> (0.109 g, 0.5 mmol, 5 mol%) were added to a flame-dried seal tube and purged with argon. Anhydrous THF (10 mL) was added, followed by 5-hydroxypentan-2-one (1.02 g, 10 mmol, 100 mol%) and isoprene monoxide (3.9 mL, 40 mmol, 400 mol%) via syringe. (**Caution:** K<sub>3</sub>PO<sub>4</sub> is hygroscopic. Please make sure all the base solid is placed at the bottom of reaction vial and submerged by solvent) After sealed with cap, the resulting mixture was allowed to stir at 60 °C for 48 hours. The solution was cooled to ambient temperature and concentrated under reduced pressure. The residue was submitted to flash column chromatography on silica gel (pretreated with triethylamine, DCM/acetone = 10:1 to 5:1). *Cautions: product starts converting to ketal upon gently heating (>30 °C) under neutral or acidic condition!* The title compound was isolated as a brown oil (1.68 g, 9 mmol) in 90% yield. *Product exists as an equilibrating mixture between hydroxyl ketone and two diastereomeric lactols (equilibrated ratio 0.48:0.30:0.22).*

**<sup>1</sup>H NMR** (400 MHz, CDCl<sub>3</sub>) δ 6.07\* (dd, *J* = 17.8, 11.0 Hz, 1H (minor2)), 5.99 (dd, *J* = 17.7, 11.1 Hz, 1H, (major)), 5.93\* (dd, *J* = 17.8, 11.0 Hz, 1H, (minor1)), 5.29-5.20 (m, 1H (major, minor1, minor2)), 5.18\* (dd, *J* = 8.7, 1.5 Hz, 1H (minor1)), 5.14\* (dd, *J* = 8.8, 1.5 Hz, 1H (minor2)), 5.13 (dd, *J* = 17.7, 1.4 Hz, 1H (major)), 4.20\* (t, *J* = 7.0 Hz, 1H (minor1)), 4.00\* (dd, *J* = 9.9, 5.7 Hz, 1H (minor2)), 3.69 (d, *J* = 10.8 Hz, 1H (major)), 3.61-3.49 (m, 2H (major, minor1, minor2)), 3.26 (br, 1H (major)), 2.99\* (br, 2H (minor1, minor2)), 2.66 (td, *J* = 6.7, 4.0 Hz, 2H (major)), 2.18 (s, 3H (major)), 2.13-1.91 (m, 1H (major) + 2H (minor1, minor2)), 1.87-1.54 (m, 2H (major, minor1, minor2)), 1.52\* (s, 3H (minor1, minor2)), 1.01 (s, 3H (major)), 0.99\* (s, 3H (minor2)), 0.97\* (s, 3H (minor1)).

**<sup>13</sup>C NMR** (100 MHz, CDCl<sub>3</sub>) δ 210.5 (major), 140.0 (major), 139.5\* (minor2), 138.8\* (minor1), 116.0\* (minor1), 115.9\* (minor2), 115.8 (major), 105.6\* (minor1), 105.2\* (minor2), 86.6\* (minor2), 84.0\* (minor1), 76.9 (major), 70.0 (major, minor1, minor2), 45.6 (major), 44.7\* (minor1), 44.4\* (minor2), 40.9 (major), 38.0\* (minor2), 37.0\* (minor1), 30.1 (major), 27.2\* (minor2), 27.1\* (minor1), 26.4\* (minor2), 26.2\* (minor1), 25.7 (major), 18.2\* (minor2), 17.8 (major), 17.7\* (minor1).

**R<sub>f</sub>** 0.2 (DCM/acetone = 6:1, *p*-anisaldehyde)

**HRMS** (ESI) Calcd. for C<sub>10</sub>H<sub>18</sub>O<sub>3</sub> [M+Na]<sup>+</sup>: 209.1148, Found: 209.1149.

**FTIR** (neat): 3384, 2978, 2878, 1705, 1638, 1416, 1362, 1215, 1166, 1091, 1011, 917, 674  $\text{cm}^{-1}$ .

**Optical Rotation**  $[\alpha]_{\text{D}}^{30} = -4.5^{\circ}$  ( $c = 1.0$ ,  $\text{CHCl}_3$ )

**HPLC** Diastereomeric ratio and enantiomeric excess was determined by HPLC analysis of the dibenzoate of product (Chiralcel AD-H column, hexanes/*i*-PrOH = 97:3, 0.50 mL/min, 230 nm), *anti:syn* = 34:1, *ee* = 98%.

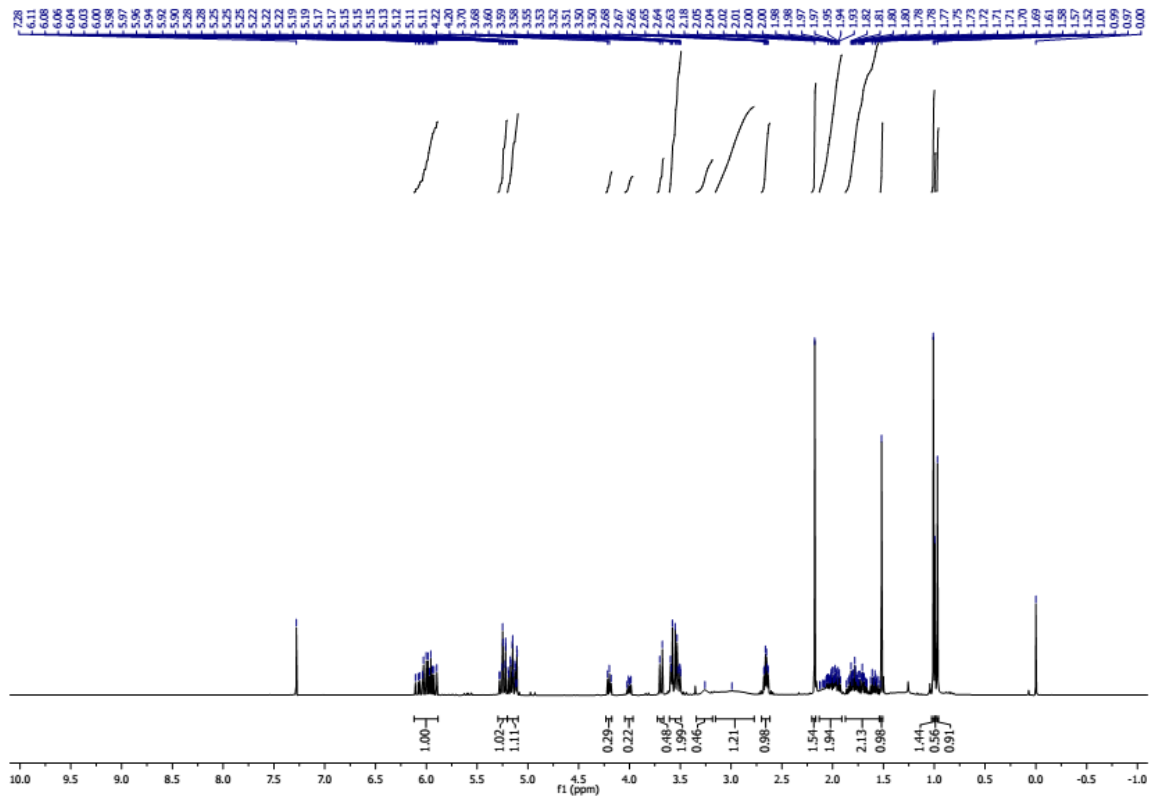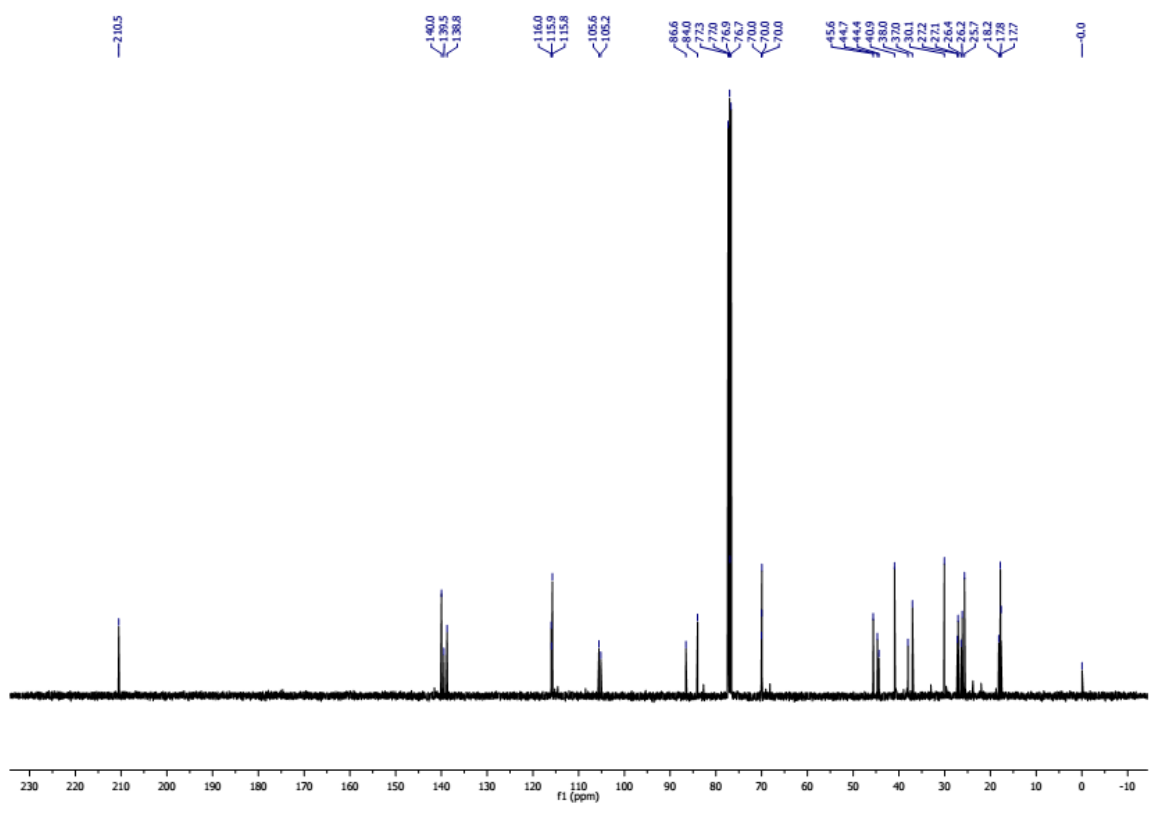



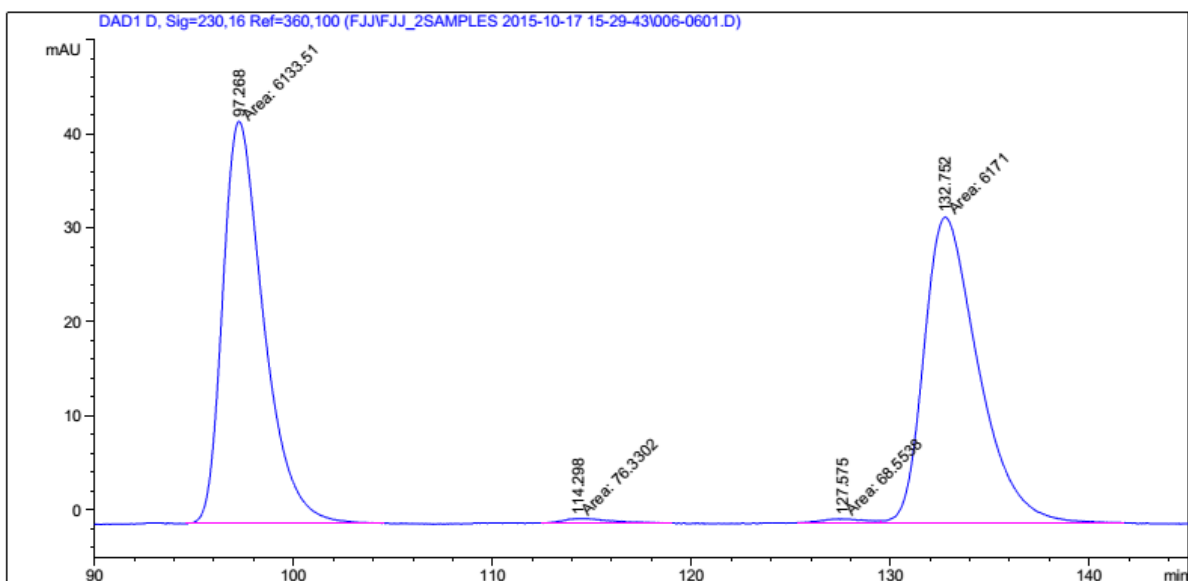

| Peak # | RetTime [min] | Type | Width [min] | Area [mAU*s] | Height [mAU] | Area %  |
|--------|---------------|------|-------------|--------------|--------------|---------|
| 1      | 97.268        | MM   | 2.3911      | 6133.50928   | 42.75188     | 49.2676 |
| 2      | 114.298       | MM   | 2.6483      | 76.33024     | 4.80368e-1   | 0.6131  |
| 3      | 127.575       | MF   | 2.6135      | 68.55382     | 4.37176e-1   | 0.5507  |
| 4      | 132.752       | FM   | 3.1614      | 6170.99561   | 32.53297     | 49.5687 |

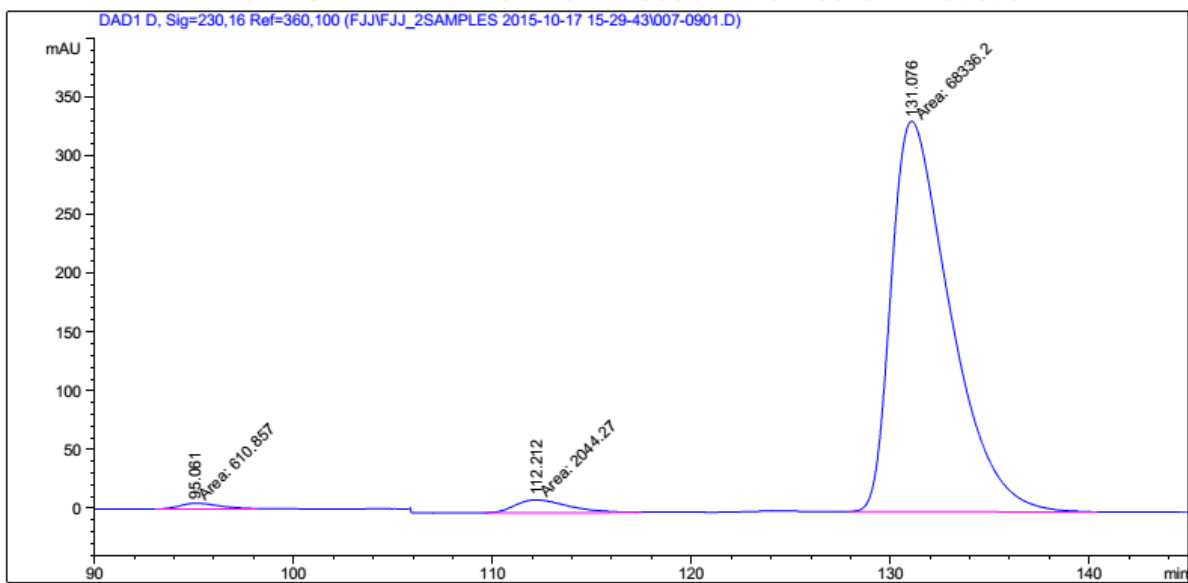

| Peak # | RetTime [min] | Type | Width [min] | Area [mAU*s] | Height [mAU] | Area %  |
|--------|---------------|------|-------------|--------------|--------------|---------|
| 1      | 95.061        | MM   | 2.2205      | 610.85699    | 4.58498      | 0.8605  |
| 2      | 112.212       | MM   | 3.1221      | 2044.26855   | 10.91295     | 2.8796  |
| 3      | 131.076       | MM   | 3.4238      | 6.83362e4    | 332.64838    | 96.2599 |

(5*S*,6*S*)-6-(((Allyldimethylsilyl)oxy)methyl)-5-hydroxy-6-methyloct-7-en-2-one (**3**)

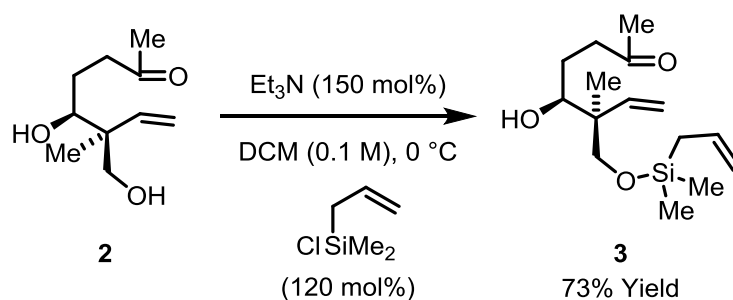

**Detailed Procedures**

To a solution of **2** (1.32 g, 7.1 mmol, 100 mol%) in anhydrous DCM (71 mL), freshly distilled triethylamine (1.07 g, 10.6 mmol, 150 mol%) was added and the resulting mixture was cooled to 0 °C. Allyl(chloro)dimethylsilane (1.15 mL, 8.5 mmol, 120 mol%) was added dropwise via syringe. The mixture was allowed to stir for 1 hour at the same temperature and quenched by addition of saturated NaHCO<sub>3</sub> aqueous solution. The two layers were separated. The organic layer was washed with brine and dried over anhydrous Na<sub>2</sub>SO<sub>4</sub>. The solvent was removed under reduced pressure, and the residue was submitted to flash column chromatography on silica gel (DCM/acetone = 100:1). The title compound was obtained as a light yellow liquid (1.48 g, 5.2 mmol) in 73% yield. *Product exists as an equilibrating mixture between hydroxyl ketone and two diastereomeric lactols (equilibrated ratio 0.70:0.18:0.12).*

**<sup>1</sup>H NMR** (400 MHz, CDCl<sub>3</sub>) δ 5.98 (dd, *J* = 17.8, 11.1 Hz, 1H (major)), 5.95\* (dd, *J* = 17.8, 11.0 Hz, 1H (minor1)), 5.88-5.76\* (m, 1H (minor2)), 5.79\* (dd, *J* = 16.9, 10.1 Hz, 1H (minor2)), 5.77 (dd, *J* = 16.9, 10.1 Hz, 1H (major)), 5.75\* (dd, *J* = 17.0, 10.1 Hz, 1H (minor1)), 5.21\* (dd, *J* = 11.0, 1.6 Hz, 1H (minor1)), 5.17 (dd, *J* = 11.1, 1.4 Hz, 1H (major)), 5.16\* (dd, *J* = 11.0, 1.6 Hz, 1H (minor2)), 5.12\* (dd, *J* = 17.8, 1.6 Hz, 1H (minor1)), 5.09\* (dd, *J* = 17.7, 1.7 Hz, 1H (minor2)), 5.07 (dd, *J* = 17.8, 1.3 Hz, 1H (major)), 4.96-4.82 (m, 2H (major, minor1, minor2)), 4.23-4.16\* (m, 1H (minor2)), 4.05-3.96\* (m, 1H (minor1)), 3.71 (d, *J* = 9.7 Hz, 1H (major)), 3.61\* (d, *J* = 9.7 Hz, 1H (minor1)), 3.60\* (d, *J* = 9.6 Hz, 1H (minor2)), 3.51 (d, *J* = 9.7 Hz, 1H (major)), 3.51-3.46 (m, 1H (major, minor2)), 3.48\* (d, *J* = 9.6 Hz, 1H (minor1)), 3.43 (dd, *J* = 4.7, 1.0 Hz, 1H (major)), 3.38\* (d, *J* = 9.6 Hz, 1H (minor2)), 2.72 (ddd, *J* = 17.7, 8.4, 5.7 Hz, 1H (major)), 2.58\* (br, 1H (minor1)), 2.53 (ddd, *J* = 17.7, 8.3, 6.6 Hz, 1H (major)), 2.15 (s, 3H (major)), 2.11\* (t, *J* = 0.9 Hz, 1H (minor2)), 2.07-1.88\* (m, 2H (minor1, minor2)), 1.85-1.73 (m, 1H (major, minor1) + 2H (minor2)), 1.73-1.66\* (m, 1H (minor1)), 1.65-1.60 (m, 2H (major, minor1, minor2)), 1.59-1.47 (m, 1H (major1)), 1.50 (s, 1H (minor2)), 1.49 (s, 1H (minor1)), 0.98 (s, 3H (major)), 0.97\* (s, 3H (minor1)), 0.93\* (s, 3H (minor2)), 0.13 (s, 6H (major)), 0.11\* (s, 6H (minor1)), 0.10\* (s, 6H (minor2)).

**<sup>13</sup>C NMR** (100 MHz, CDCl<sub>3</sub>) δ 209.6 (major), 140.2\* (minor2), 140.1 (major), 140.1\* (minor1), 134.3\* (minor1), 134.1\* (minor2), 133.4 (major), 115.5\* (minor1), 115.3\* (minor2), 114.9 (major), 114.1 (major), 113.6\* (minor2), 113.4\* (minor1), 105.2\* (minor2), 104.7\* (minor1), 83.6\* (minor2), 81.2\* (minor1), 77.2 (major), 70.8 (major), 68.2\* (minor2), 68.0\* (minor1), 45.3\* (minor2), 44.7 (major), 44.7\*

(minor1), 40.6 (major), 38.7\* (minor1), 37.4\* (minor2), 30.1 (major), 27.1\* (minor1), 26.9\* (minor2), 25.9 (major), 25.8\* (minor2), 25.7\* (minor1), 24.4\* (minor1), 24.3\* (minor2), 24.0 (major), 18.5 (major), 17.8\* (minor2), 16.95\* (minor1), -2.5\* (minor1), -2.6\* (minor2), -2.8 (major).

**R<sub>f</sub>** 0.3 (hexanes/acetone = 6:1, *p*-anisaldehyde)

**HRMS** (ESI) Calcd. for C<sub>15</sub>H<sub>28</sub>O<sub>3</sub>Si [M+Na]<sup>+</sup>: 307.1700, Found: 307.1704.

**FTIR** (neat): 3442, 2970, 1717, 1631, 1417, 1364, 1252, 1216, 1158, 1081, 893, 859, 834, 751 cm<sup>-1</sup>.

**Optical Rotation**  $[\alpha]_{\text{D}}^{30} = -8.0^{\circ}$  ( $c = 1.0$ , CHCl<sub>3</sub>)

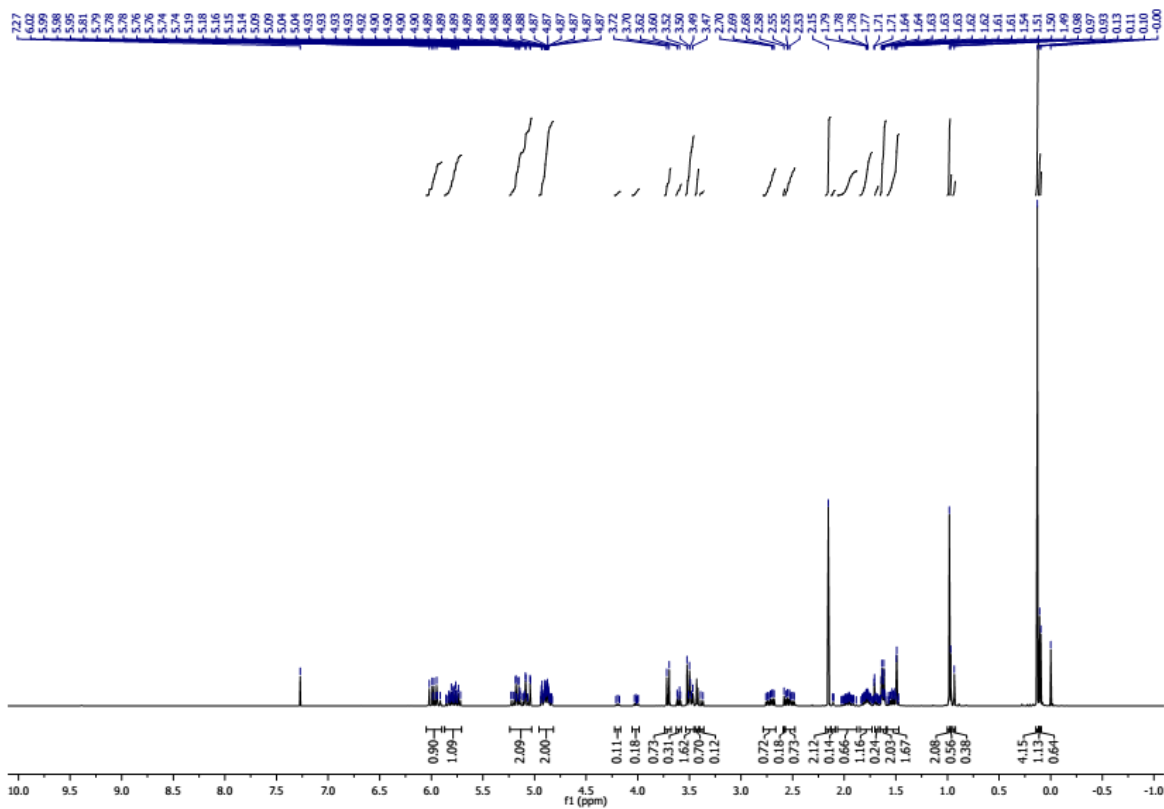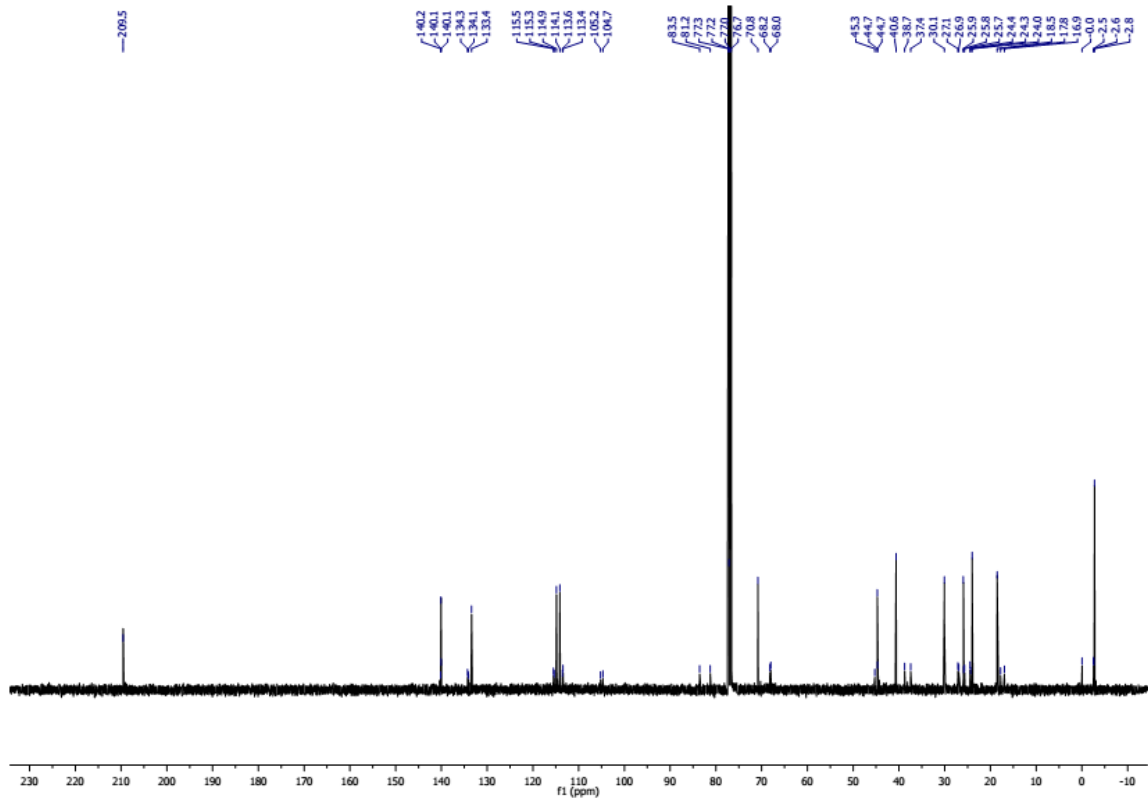

(S)-5-Hydroxy-5-((S)-2,2,6-trimethyl-2,3,6,7-tetrahydro-1,2-oxasilepin-6-yl)pentan-2-one (**4**)

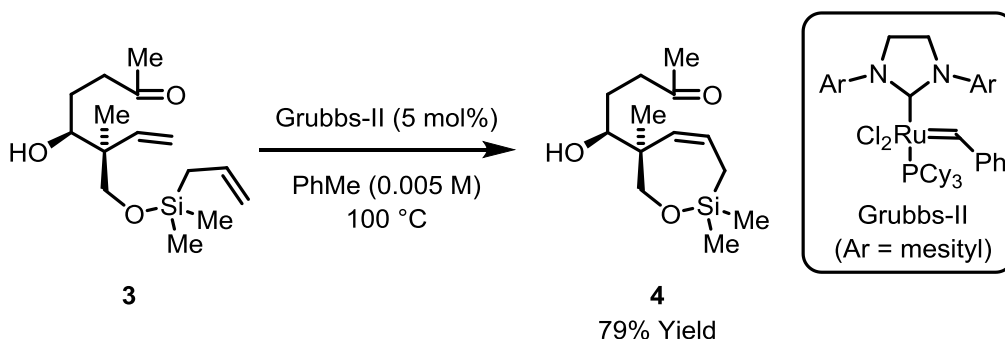

### Detailed Procedures

A solution of **3** (0.515 g, 1.8 mmol, 100 mol%) in toluene (350 mL) was degassed by freeze-pump-thaw cycle for three times. It was heated to 100 °C, and a freshly made solution of Grubbs-II catalyst (0.0768 g, 0.09 mmol, 5 mol%) in toluene (8 mL) was added via syringe pump in a period of 2 hours. The mixture was allowed to stir at the same temperature for 3 hours. It was cooled to ambient temperature and further cooled in an ice bath, when DMSO (0.32 mL, 4.5 mmol, 250 mol%) was added. After stirred for 12 hours, the solvent was removed under reduced pressure. The residue was submitted to flash column chromatography on silica gel (pretreated with triethylamine, hexanes/acetone = 15:1). The title compound was obtained as a brown oil (0.358 g, 1.4 mmol) in 79% yield, which solidified upon standing in a -20 °C freezer. *Product exists as an equilibrating mixture between hydroxyl ketone and two diastereomeric lactols (equilibrated ratio 0.66:0.18:0.16).*

**<sup>1</sup>H NMR** (400 MHz, CDCl<sub>3</sub>) δ 5.78 (dt, *J* = 11.9, 7.3 Hz, 1H (major)), 5.73\* (dt, *J* = 11.7, 7.2 Hz, 1H (minor2)), 5.66\* (ddd, *J* = 11.8, 7.8, 6.8 Hz, 1H (minor1)), 5.22 (d, *J* = 11.9 Hz, 1H (major)), 5.17\* (d, *J* = 12.0 Hz, 1H (minor2)), 5.15\* (d, *J* = 11.8 Hz, 1H (minor1)), 4.23\* (dd, *J* = 11.9, 0.8 Hz, 1H (minor1)), 4.08\* (d, *J* = 11.7 Hz, 1H (minor2)), 4.05\* (dd, *J* = 8.1, 5.6 Hz, 1H (minor1)), 4.00 (dd, *J* = 11.9, 1.0 Hz, 1H (major)), 3.89\* (dd, *J* = 10.2, 6.4 Hz, 1H (minor2)), 3.82 (d, *J* = 11.9 Hz, 1H (major)), 3.65\* (dd, *J* = 11.9, 0.7 Hz, 1H (minor1)), 3.58\* (dd, *J* = 11.7, 1.0 Hz, 1H (minor2)), 3.40 (ddd, *J* = 11.1, 4.7, 2.2 Hz, 1H (major)), 3.32\* (br, 1H (minor1)), 2.97 (dd, *J* = 4.7, 1.0 Hz, 1H (major)), 2.71 (ddd, *J* = 17.8, 7.9, 6.0 Hz, 1H (major)), 2.55 (dt, *J* = 17.9, 7.1 Hz, 1H (major)), 2.25-2.14\* (m, 1H (minor1)), 2.16 (s, 3H (major)), 2.13-2.03\* (m, 1H (minor2)), 2.01-1.74 (m, 1H (major) + 3H (minor1, minor2)), 1.70-1.56 (m, 3H (major) + 2H (minor1, minor2)), 1.54-1.44\* (m, 1H (minor2)), 1.51\* (s, 3H (minor2)), 1.50\* (s, 3H (minor1)), 1.00\* (s, 3H (minor1)), 0.99\* (s, 3H (minor2)), 0.92 (s, 3H (major)), 0.16\* (s, 3H (minor1)), 0.15 (s, 3H (major)), 0.14 (s, 3H (major)), 0.14\* (s, 3H (minor1)), 0.13\* (s, 3H (minor2)), 0.13\* (s, 3H (minor2)).

**<sup>13</sup>C NMR** (100 MHz, CDCl<sub>3</sub>) δ 209.7 (major), 133.0\* (minor1), 132.6\* (minor2), 131.6 (major), 125.3 (major), 124.1\* (minor2), 123.8\* (minor1), 105.4\* (minor1), 104.9\* (minor2), 86.0\* (minor2), 84.1\* (minor1), 79.0 (major), 70.0 (major), 67.4\* (minor1), 67.4\* (minor2), 48.0 (major), 47.0\* (minor1), 46.9\* (minor2), 40.9 (major), 38.9\* (minor1), 37.4\* (minor2), 30.1 (major), 27.1\* (minor1), 26.5\* (minor2), 26.1\* (minor1), 25.5 (major, minor2), 22.4\* (minor2), 21.1 (major), 20.9\* (minor1), 16.1\* (minor1), 16.0

(major), 16.0\* (minor2), -1.1\* (minor1), -1.2\* (minor1), -1.2\* (minor2), -1.3 (major), -1.4 (major, minor2).

**R<sub>f</sub>** 0.1 (DCM/acetone = 50:1, *p*-anisaldehyde)

**HRMS** (ESI) Calcd. for C<sub>13</sub>H<sub>24</sub>O<sub>3</sub>Si [M+Na]<sup>+</sup>: 279.1387, Found: 279.1386.

**FTIR** (neat): 3419, 2957, 2879, 1715, 1406, 1375, 1250, 1084, 859, 839, 809, 752, 730, 678 cm<sup>-1</sup>.

**MP** 55.2-55.5 °C (CH<sub>2</sub>Cl<sub>2</sub>)

**Optical Rotation** [α]<sub>D</sub><sup>30</sup> = +13.6° (*c* = 1.3, CHCl<sub>3</sub>)

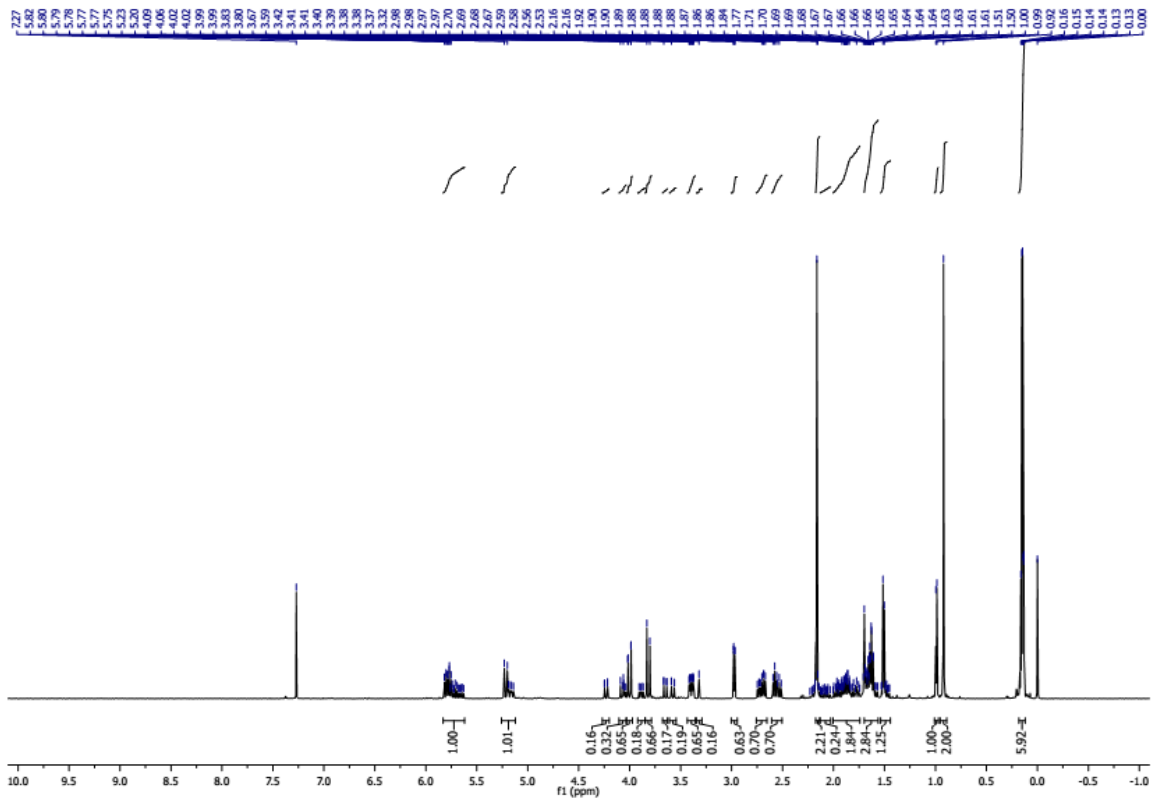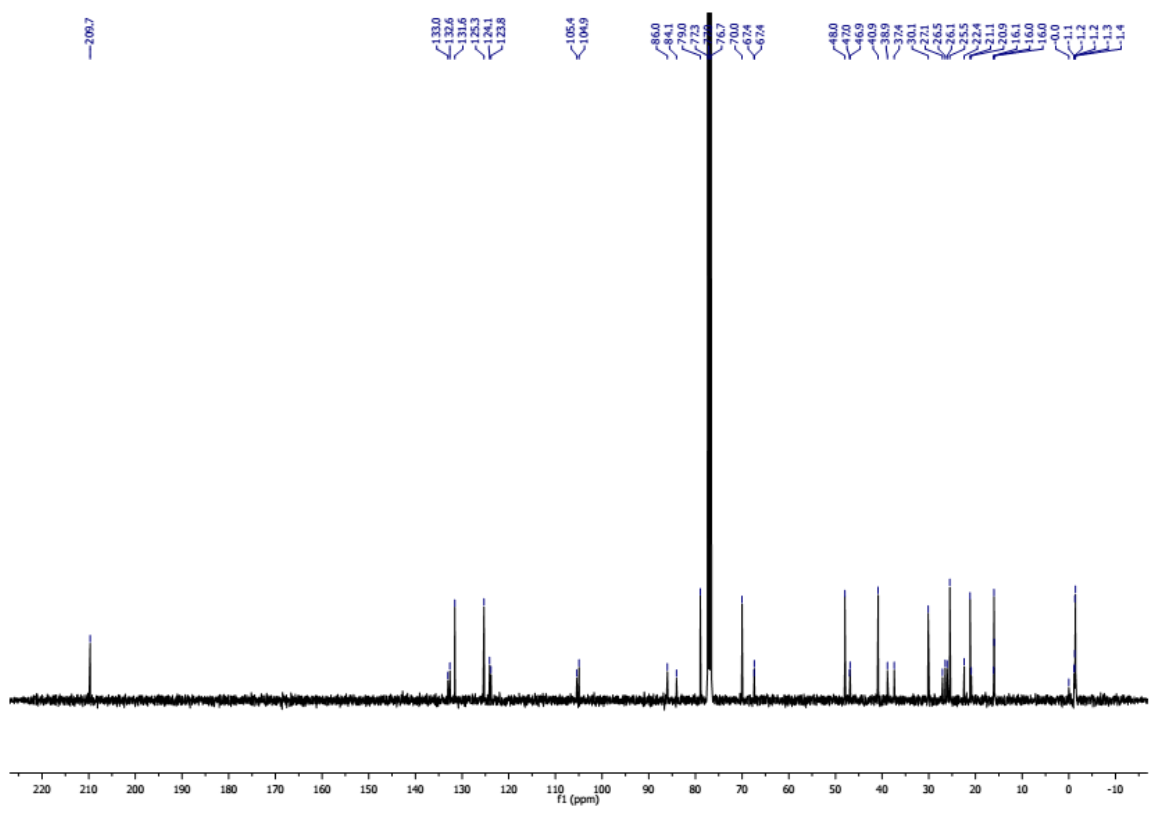

**((1*S*,2*S*,3*S*,4*R*)-2,4-Dimethyl-3-vinyl-7-oxabicyclo[2.2.1]heptan-2-yl)methanol (Fragment A)**

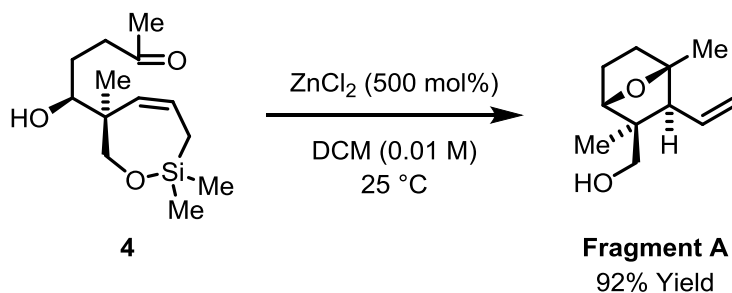

**Detailed Procedures**

To a solution of **4** (0.128 g, 0.5 mmol, 100 mol%) in DCM (50 mL) at  $-78^\circ\text{C}$ ,  $\text{ZnCl}_2$  (1M solution in  $\text{Et}_2\text{O}$ , 2.5 mL, 2.5 mmol, 500 mol%) was added. The resulting mixture was allowed to warm to ambient temperature, and stirred for 2 hours. The reaction was quenched by addition of saturated  $\text{NaHCO}_3$  (aq., 50 mL), and stirred for 10 min. The mixture was filtered through Celite, and the precipitate was washed with DCM. The filtrate was separated, and the aqueous layer was extracted with DCM (50 mL). The combined organic layers were dried over anhydrous  $\text{Na}_2\text{SO}_4$ . The solvent was removed under reduced pressure, and the residue was submitted to flash column chromatography on silica gel (hexanes/acetone = 15:1). The title compound was obtained as a light yellow oil (0.0843 g, 0.46 mmol) in 92% yield, which solidified upon standing in freezer.

**$^1\text{H NMR}$**  (400 MHz,  $\text{CDCl}_3$ )  $\delta$  5.91 (ddd,  $J = 16.9, 10.8, 10.0$  Hz, 1H), 5.11 (dd,  $J = 10.0, 2.3$  Hz, 1H), 5.02 (ddd,  $J = 16.9, 2.3, 0.6$  Hz, 1H), 4.23 (d,  $J = 5.4$  Hz, 1H), 3.54-3.42 (m, 2H), 2.75 (dd,  $J = 6.6, 3.6$  Hz, 1H), 2.02-1.92 (m, 2H), 1.80 (tt,  $J = 12.5, 5.3$  Hz, 1H), 1.66-1.50 (m, 2H), 1.28 (s, 3H), 1.04 (s, 3H).

**$^{13}\text{C NMR}$**  (100 MHz,  $\text{CDCl}_3$ )  $\delta$  136.3, 117.8, 87.0, 82.5, 68.3, 63.1, 50.8, 37.7, 26.2, 20.3, 18.7.

**$R_f$**  0.3 (hexanes/EA = 3:1, *p*-anisaldehyde)

**HRMS** (CI) Calcd. for  $\text{C}_{11}\text{H}_{18}\text{O}_2$   $[\text{M}+\text{H}]^+$ : 183.1380, Found: 183.1383.

**FTIR** (neat): 3375, 2975, 2914, 1633, 1381, 1187, 1073, 1020, 1015, 1001, 991, 914, 908, 873, 826, 804, 682  $\text{cm}^{-1}$ .

**MP** 60.9-61.5  $^\circ\text{C}$  ( $\text{CH}_2\text{Cl}_2$ )

**Optical Rotation**  $[\alpha]_D^{30} = +40.0^\circ$  ( $c = 1.0, \text{CHCl}_3$ )



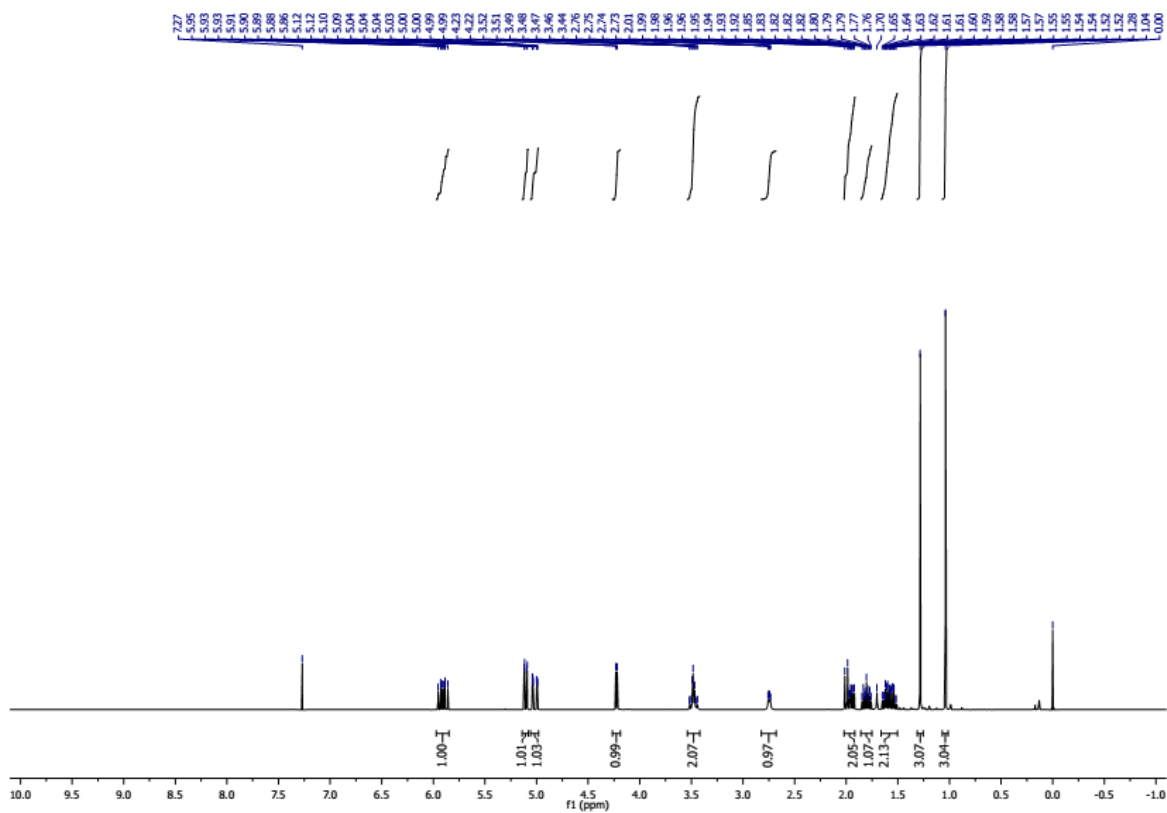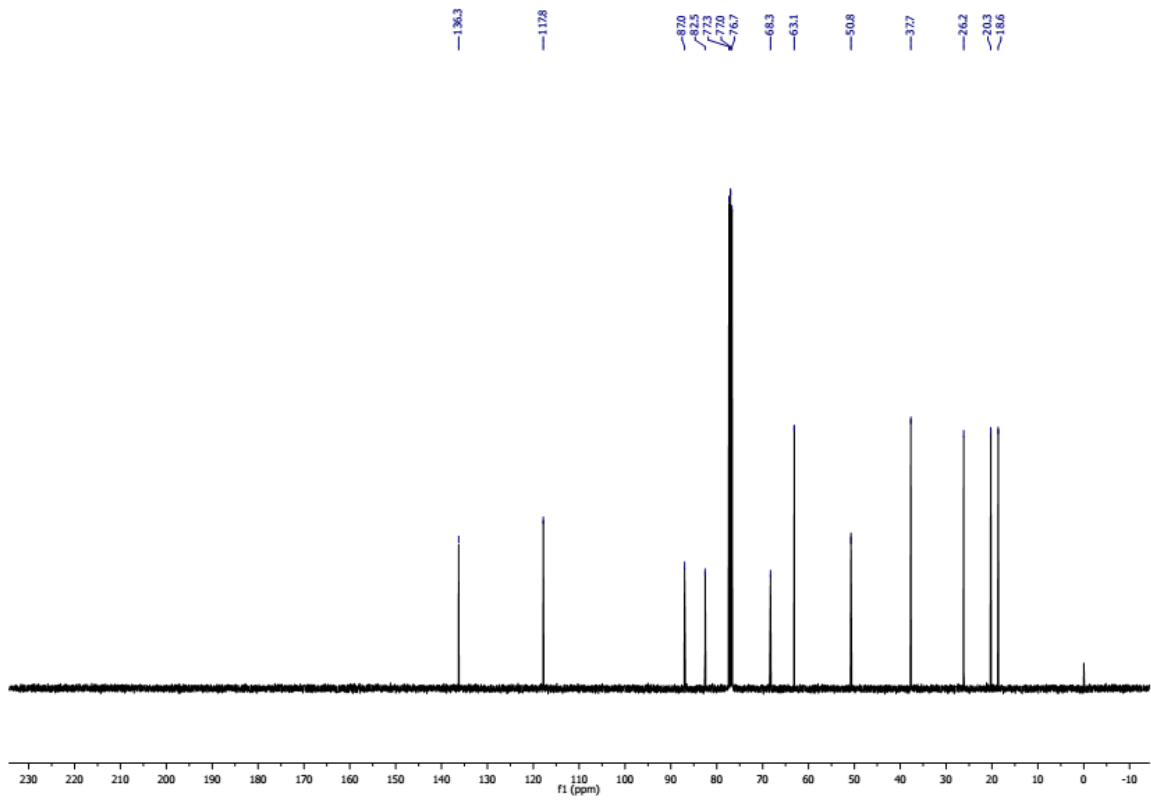

**((1*S*,2*S*,3*S*,4*R*)-3-(2-(9*H*-Carbazol-2-yl)ethyl)-2,4-dimethyl-7-oxabicyclo[2.2.1]heptan-2-yl)methanol (5)**

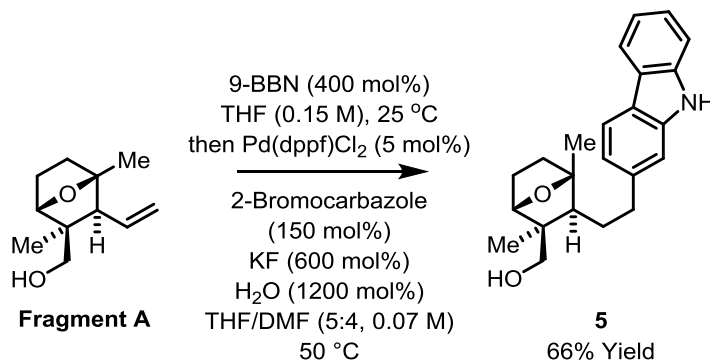

**Detailed Procedures**

To a solution of alkene (0.150 g, 0.82 mmol, 100 mol%) in THF (0.8 mL), a solution of 9-BBN (0.403 g, 3.3 mmol, 400 mol%) in THF (4.4 mL) was added slowly at ambient temperature. The mixture was stirred at the same temperature until TLC indicated all the starting alkene was consumed (about an hour). The resulting clear solution was mixed with anhydrous KF (0.286 g, 4.9 mmol, 600 mol%), Pd(dppf)Cl<sub>2</sub> (0.0300 g, 0.041 mmol, 5 mol%) and 2-bromocarbazole (0.303 g, 1.23 mmol, 150 mol%), followed by addition of DMF (4 mL) and water (0.18 mL, 9.8 mmol, 1200 mol%). The degassed heterogeneous mixture was heated to 50 °C and vigorously stirred overnight. After cooled to ambient temperature, the reaction mixture was diluted with ethyl acetate (5 mL) and water (5 mL). The separated organic layer was washed with 1 M NaOH (3 mL × 2) and brine (3 mL), and dried over anhydrous Na<sub>2</sub>SO<sub>4</sub>. The solvent was removed under reduced pressure, and the residue was submitted to flash column chromatography on silica gel (hexanes/acetone = 10:1 to 5:1). The title compound was obtained as a pale yellow solid (0.191 g, 0.55 mmol) in 66% yield.

**<sup>1</sup>H NMR** (400 MHz, CD<sub>3</sub>OD) δ 7.98 (dt, *J* = 7.8, 1.1 Hz, 1H), 7.93 (dd, *J* = 8.0, 0.7 Hz, 1H), 7.40 (dt, *J* = 8.1, 1.0 Hz, 1H), 7.31 (ddd, *J* = 8.2, 7.1, 1.2 Hz, 1H), 7.25 (dd, *J* = 1.5, 0.7 Hz, 1H), 7.11 (ddd, *J* = 8.0, 7.1, 1.1 Hz, 1H), 6.99 (dd, *J* = 8.0, 1.5 Hz, 1H), 4.26 (d, *J* = 5.4 Hz, 1H), 3.72 (d, *J* = 10.3 Hz, 1H), 3.54 (d, *J* = 10.4 Hz, 1H), 2.86-2.70 (m, 2H), 1.94 (ddd, *J* = 12.5, 9.1, 4.6 Hz, 1H), 1.79-1.58 (m, 4H), 1.55-1.45 (m, 2H), 1.39 (s, 3H), 1.16 (s, 3H).

**<sup>13</sup>C NMR** (100 MHz, CD<sub>3</sub>OD) δ 141.9, 141.6, 141.4, 126.1, 124.4, 122.5, 120.8, 120.6, 120.4, 119.6, 111.6, 111.1, 88.4, 82.1, 66.3, 56.7, 50.8, 40.1, 38.0, 29.7, 26.6, 21.5, 19.1.

**R<sub>f</sub>** 0.1 (hexanes/acetone = 5:1, UV/*p*-anisaldehyde)

**HRMS** (CI) Calcd. for C<sub>23</sub>H<sub>27</sub>NO<sub>2</sub> [M]<sup>+</sup>: 349.2042, Found: 349.2036.

**FTIR** (neat): 3462, 3416, 2955, 2872, 1608, 1460, 1438, 1380, 1327, 1241, 1040, 1007, 984, 976, 828, 744, 726 cm<sup>-1</sup>.

**MP** 215.4-217.0 °C (CHCl<sub>3</sub>)

**Optical Rotation** [α]<sub>D</sub><sup>30</sup> = +33.3° (*c* = 0.1, CH<sub>3</sub>OH)

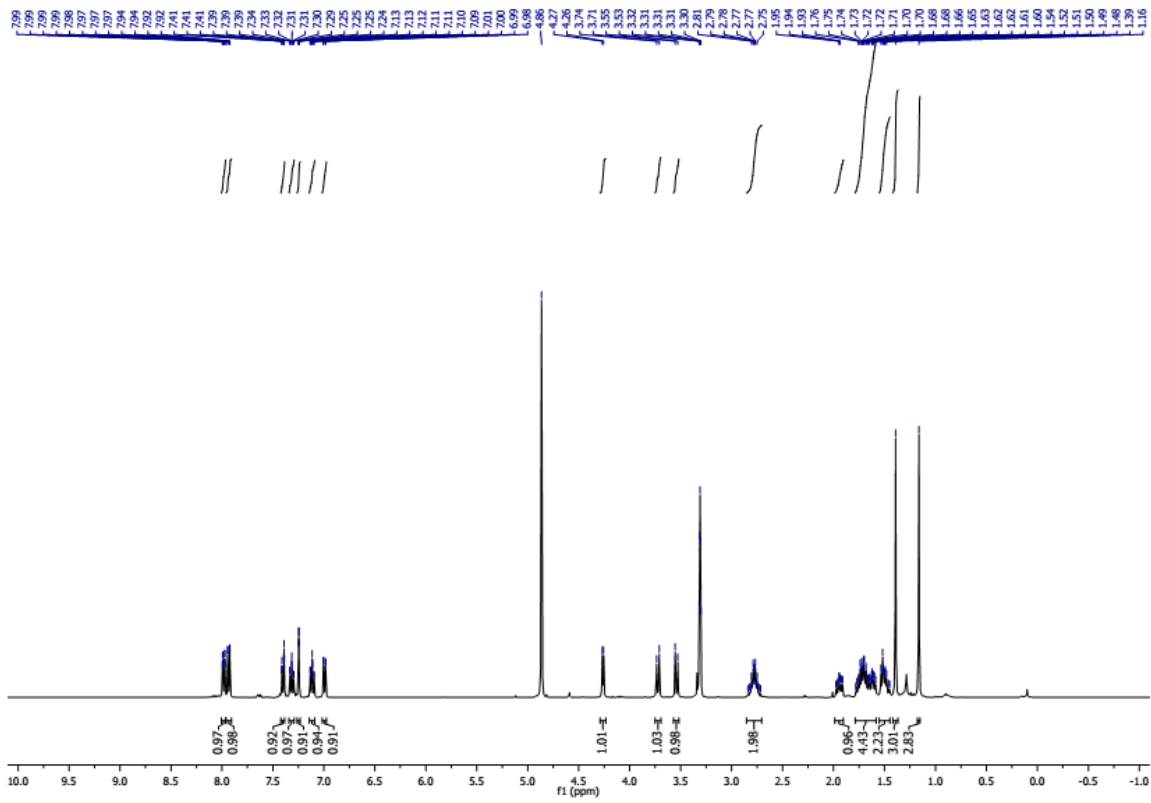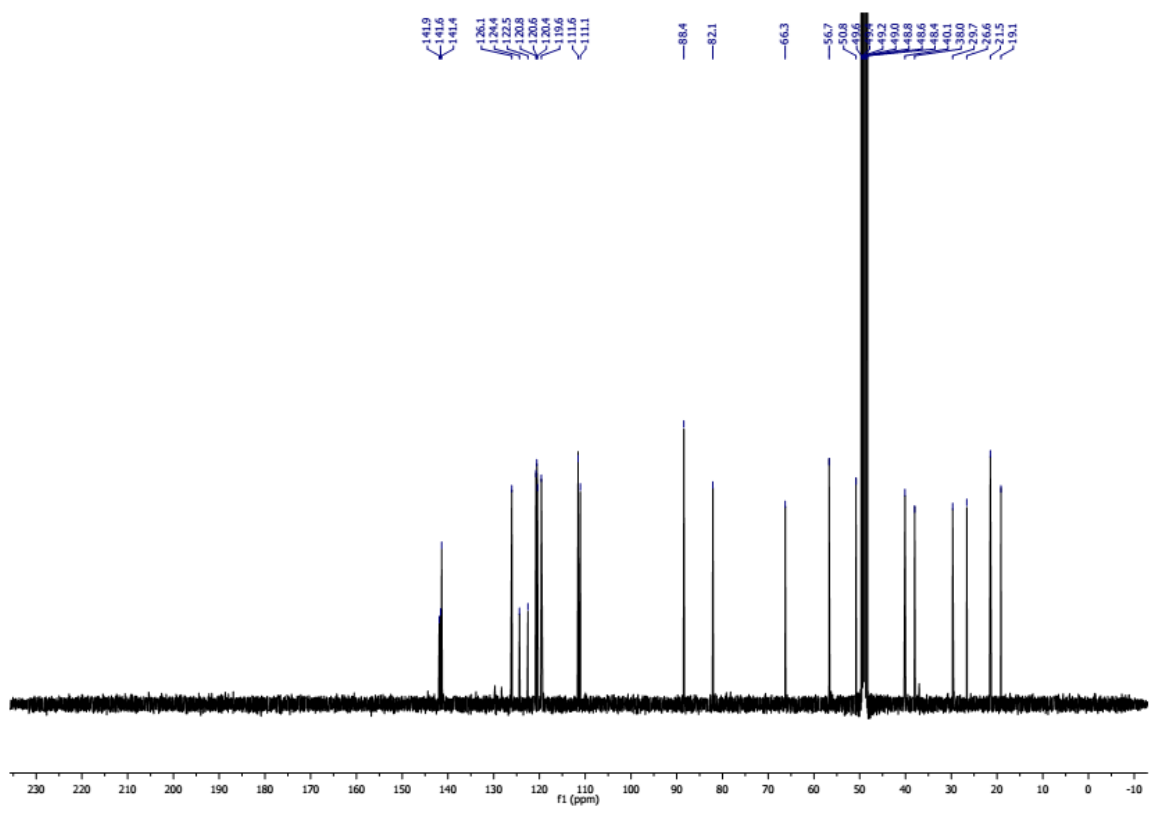

**(1*S*,2*R*,3*S*,4*R*)-3-(2-(9*H*-Carbazol-2-yl)ethyl)-2,4-dimethyl-7-oxabicyclo[2.2.1]heptane-2-carboxylic acid (6)**

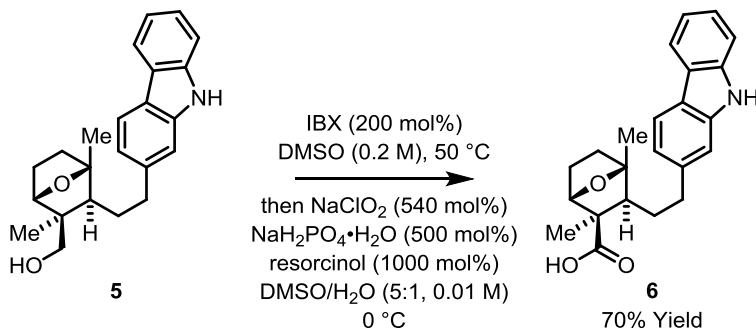

**Detailed Procedures**

A suspension of alcohol **5** (0.0175 g, 0.05 mmol, 100 mol%) and IBX (0.0280 g, 0.1 mmol, 200 mol%) in DMSO (0.25 mL) was heated to 50 °C. The mixture became homogeneous eventually and was stirred at the same temperature for 2 hours. After cooled to ambient temperature, a solution of resorcinol (0.0551 g, 0.5 mmol, 1000 mol%) in DMSO (3.5 mL) was added, followed by dropwise addition of an ice-cooled solution of NaClO<sub>2</sub> (80 wt% pure, 0.0305 g, 0.27 mmol, 540 mol%) and NaH<sub>2</sub>PO<sub>4</sub>·H<sub>2</sub>O (0.0345 g, 0.25 mmol, 500 mol%) in water (0.75 mL). The resulting mixture was allowed to stir at 0 °C for 30 min until all the aldehyde intermediate was consumed. The reaction was quenched by addition of saturated NH<sub>4</sub>Cl (aq., 5 mL), and extracted with ethyl acetate (5 mL × 2). The combined organic layers were washed with water (5 mL × 2), and dried over anhydrous MgSO<sub>4</sub>. The solvent was removed under reduced pressure, and the residue was submitted to flash column chromatography on silica gel (hexanes/acetone/AcOH = 100:20:0.05). The product-containing fractions were concentrated and repurified by column chromatography on silica gel (hexanes/EA/AcOH = 100:30:0.05). The title compound was obtained as a white solid (0.0126 g, 0.035 mmol) in 70% yield.

**<sup>1</sup>H NMR** (400 MHz, CD<sub>3</sub>OD) δ 7.97 (dt, *J* = 7.8, 1.0 Hz, 1H), 7.91 (dd, *J* = 8.0, 0.6 Hz, 1H), 7.39 (dt, *J* = 8.1, 0.9 Hz, 1H), 7.30 (ddd, *J* = 8.2, 7.1, 1.2 Hz, 1H), 7.23 (dd, *J* = 1.5, 0.7 Hz, 1H), 7.10 (ddd, *J* = 8.0, 7.1, 1.1 Hz, 1H), 6.98 (dd, *J* = 8.0, 1.5 Hz, 1H), 4.46 (d, *J* = 5.2 Hz, 1H), 2.85 (ddd, *J* = 13.5, 10.3, 5.6 Hz, 1H), 2.71 (ddd, *J* = 13.5, 10.0, 6.0 Hz, 1H), 2.00 (ddd, *J* = 12.9, 9.0, 4.0 Hz, 1H), 1.94-1.83 (m, 1H), 1.83-1.63 (m, 4H), 1.56 (td, *J* = 12.1, 4.0 Hz, 1H), 1.44 (s, 3H), 1.36 (s, 3H).

**<sup>13</sup>C NMR** (100 MHz, CD<sub>3</sub>OD) δ 177.0, 140.5, 140.1, 139.9, 124.6, 122.9, 121.0, 119.3, 119.2, 119.1, 118.1, 110.1, 109.7, 86.5, 82.6, 57.8, 56.8, 37.7, 35.1, 31.7, 26.2, 20.8, 17.6.

**R<sub>f</sub>** 0.15 (hexanes/acetone/AcOH = 100:40:0.05, UV/*p*-anisaldehyde)

**HRMS** (ESI) Calcd. for C<sub>23</sub>H<sub>25</sub>NO<sub>3</sub> [M+Na]<sup>+</sup>: 386.1727, Found: 386.1732.

**FTIR** (neat): 3357, 2933, 2871, 2496, 1731, 1607, 1460, 1441, 1401, 1383, 1326, 1240, 1109, 1001, 976, 865, 819, 769, 750, 731 cm<sup>-1</sup>.

**MP** 194.3-196.4 °C (CH<sub>3</sub>OH)

**Optical Rotation** [α]<sub>D</sub><sup>30</sup> = +5.4° (*c* = 0.6, CH<sub>3</sub>OH)



**(3*S*,4*R*,4*aR*,13*bS*)-3-Hydroxy-4,13*b*-dimethyl-2,3,4,4*a*,5,6,8,13*b*-octahydro-1*H*-naphtho[2,1-*b*]carbazole-4-carboxylic acid ((+)-Oridamycin A)**

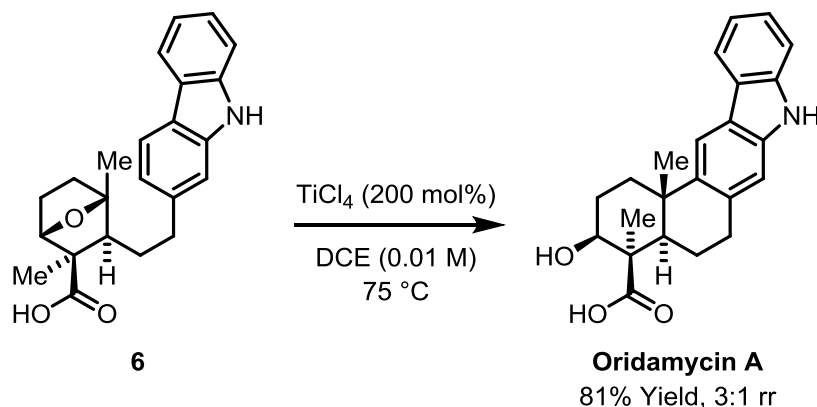

**Detailed Procedures**

To a solution of acid **6** (0.0109 g, 0.03 mmol, 100 mol%) in DCE (2.8 mL), a solution of  $\text{TiCl}_4$  in DCE (0.25 M, freshly prepared, 0.24 mL, 0.06 mmol, 200 mol%) was added dropwise. The mixture was heated to 75 °C and allowed to stir for 15 hours. After cooled to ambient temperature, the reaction was poured into saturated  $\text{NaHCO}_3$  (aq., 20 mL) and allowed to stir for 15 min. Solid  $\text{KHSO}_4$  was added until the pH was adjusted to 2. The mixture was extracted by DCM (10 mL  $\times$  2). The combined organic layers were washed with brine (10 mL), and dried over  $\text{MgSO}_4$ . The solvent was removed under reduced pressure, and the residue was submitted to flash column chromatography on silica gel (DCM/MeOH/AcOH = 100:1:0 to 100:1:0.05). The title compound was obtained as a pale yellow solid (0.0068 g, 0.019 mmol) along with its regioisomer (0.0023 g, 0.006 mmol) in 81% combined yield and 3:1 regioselectivity.

**$^1\text{H NMR}$**  (500 MHz,  $\text{CD}_3\text{OD}$ )  $\delta$  7.96 (dt,  $J = 8.1, 1.0$  Hz, 1H), 7.96 (s, 1H), 7.34 (dt,  $J = 8.1, 0.9$  Hz, 1H), 7.28 (ddd,  $J = 8.1, 7.1, 1.2$  Hz, 1H), 7.08 (ddd,  $J = 8.1, 7.1, 1.2$  Hz, 1H), 7.06 (s, 1H), 3.25 (dd,  $J = 12.2, 4.4$  Hz, 1H), 3.08 (ddd,  $J = 17.2, 5.6, 1.9$  Hz, 1H), 2.97 (dddd,  $J = 16.5, 12.7, 6.2, 1.3$  Hz, 1H), 2.60 (dt,  $J = 13.2, 3.7$  Hz, 1H), 2.32 (qd,  $J = 13.3, 3.8$  Hz, 1H), 2.28-2.19 (m, 1H), 2.20-2.07 (m, 1H), 1.93 (dq,  $J = 13.1, 3.9$  Hz, 1H), 1.61 (td,  $J = 13.5, 3.9$  Hz, 1H), 1.52 (dd,  $J = 12.2, 2.1$  Hz, 1H), 1.50 (s, 3H), 1.28 (s, 3H).

**$^{13}\text{C NMR}$**  (125 MHz,  $\text{CD}_3\text{OD}$ )  $\delta$  181.0, 142.1, 140.4, 140.1, 134.5, 126.1, 124.6, 123.3, 120.6, 119.3, 117.5, 111.4, 110.7, 79.1, 54.1, 49.8, 40.0, 39.6, 34.0, 30.3, 24.8, 24.6, 22.5.

**$R_f$**  0.25 (DCM/MeOH = 50:1 (twice), UV/*p*-anisaldehyde)

**HRMS** (ESI) Calcd. for  $\text{C}_{23}\text{H}_{25}\text{NO}_3$   $[\text{M}+\text{Na}]^+$ : 386.1727, Found: 386.1725.

**FTIR** (neat): 3406, 2918, 2851, 1702, 1612, 1466, 1439, 1319, 1240, 1186, 1088, 1071, 1025, 889, 859, 749, 736  $\text{cm}^{-1}$ .

**MP** 183 °C (decomp.)



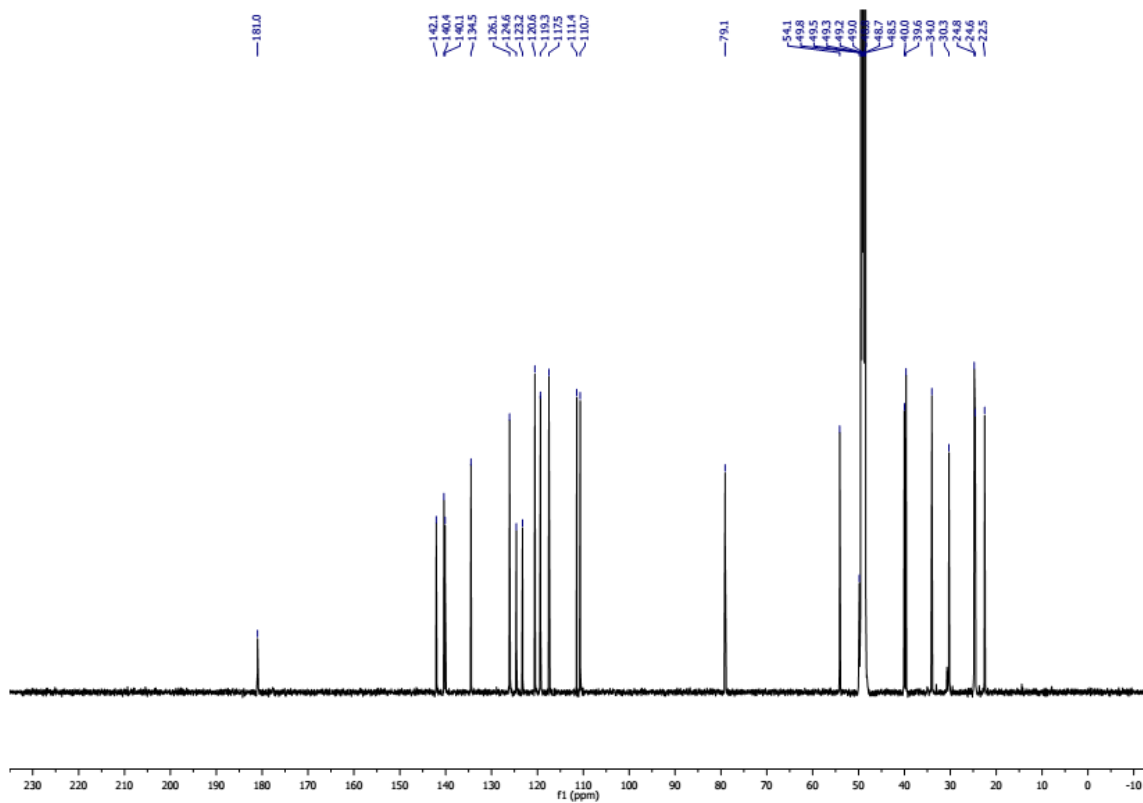



## Detailed Procedures and Spectral Data for Asymmetric Synthesis of Triptoquinone C

### 2-Bromo-6-isopropyl-4-methoxyphenol (Fragment B-II)

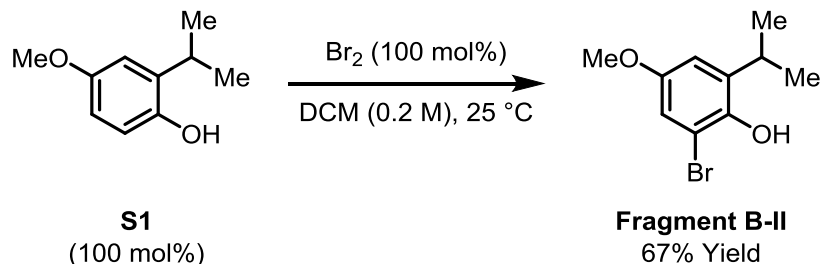

### Detailed Procedures

To a solution of phenol **S1**<sup>2</sup> (3.11 g, 18.7 mmol, 100 mol%) in DCM (73.5 mL) at 0 °C, a solution of Br<sub>2</sub> (0.96 mL, 18.7 mmol, 100 mol%) in DCM (20 mL) was added dropwise in a period of 10 min. The resulting mixture was allowed to warm to ambient temperature and stirred overnight. The reaction was quenched by addition of saturated NaHCO<sub>3</sub> (aq., 100 mL), and kept stirring until the solution turned yellow (about 10 min). The organic layer was separated, washed with brine (100 mL), and dried over anhydrous Na<sub>2</sub>SO<sub>4</sub>. The solvent was removed under reduced pressure, and the residue was submitted to flash column chromatography on silica gel (hexanes/EA = 50:1). The title compound was obtained as a yellow to red-brown oil (3.08 g, 12.6 mmol) in 67% yield.

**<sup>1</sup>H NMR** (400 MHz, CDCl<sub>3</sub>) δ 6.84 (d, *J* = 2.9 Hz, 1H), 6.74 (dt, *J* = 2.9, 0.6 Hz, 1H), 5.21 (d, *J* = 0.5 Hz, 1H), 3.75 (s, 3H), 3.29 (hept, *J* = 6.9 Hz, 1H), 1.22 (d, *J* = 6.9 Hz, 6H).

**<sup>13</sup>C NMR** (100 MHz, CDCl<sub>3</sub>) δ 153.7, 143.9, 137.1, 113.3, 113.3, 110.1, 56.0, 28.4, 22.5.

**R<sub>f</sub>** 0.6 (hexanes/EA = 10:1, UV)

**HRMS** (ESI) Calcd. for C<sub>10</sub>H<sub>13</sub>BrO<sub>2</sub> [M+Na]<sup>+</sup>: 243.0026, Found: 243.0022.

**FTIR** (neat): 3516, 2961, 1606, 1576, 1474, 1425, 1330, 1292, 1198, 1175, 1157, 1092, 1039, 938, 877, 849, 824, 764, 733 cm<sup>-1</sup>.

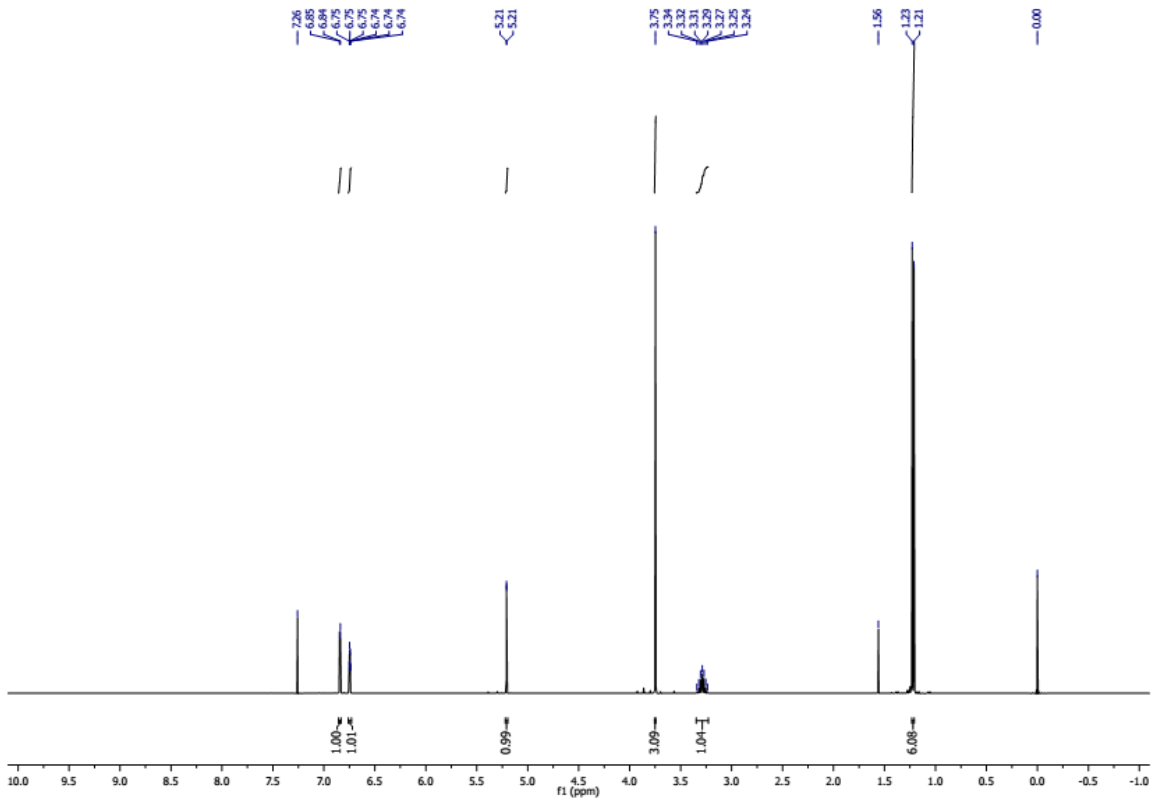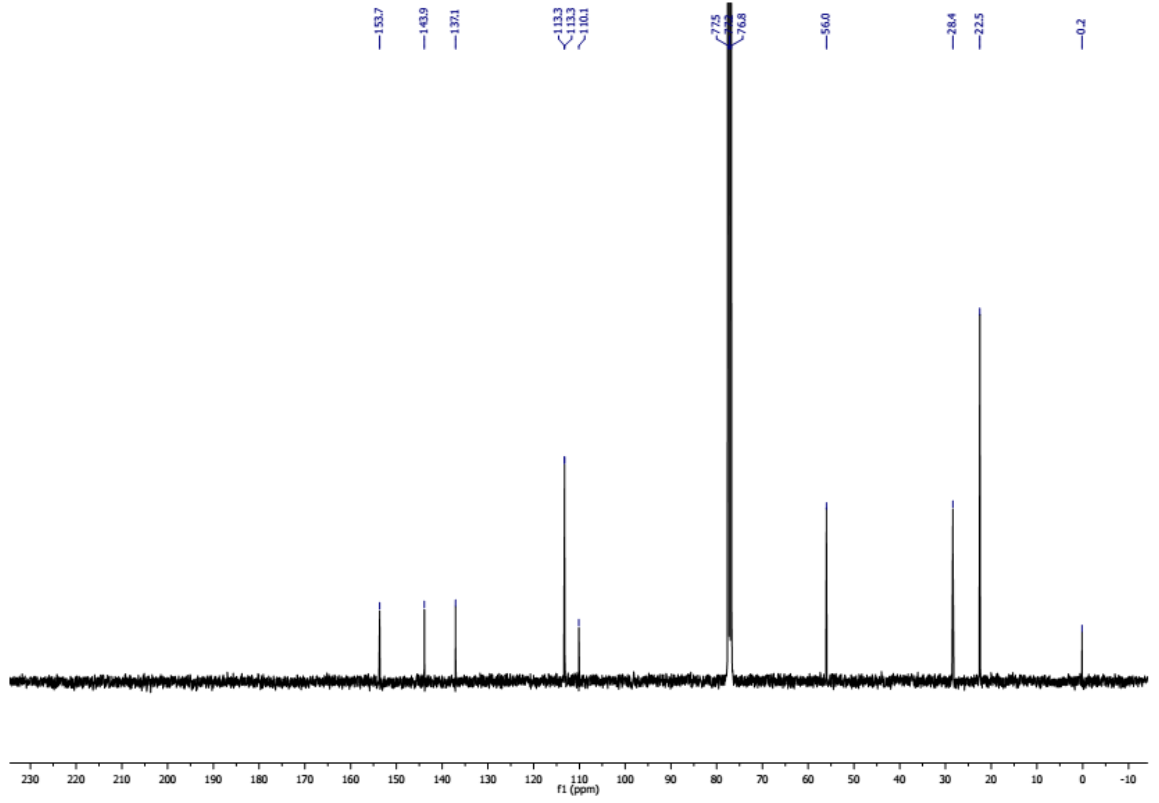

**2-(2-((1*R*,2*S*,3*S*,4*S*)-3-(Hydroxymethyl)-1,3-dimethyl-7-oxabicyclo[2.2.1]heptan-2-yl)ethyl)-6-isopropyl-4-methoxyphenol (7)**

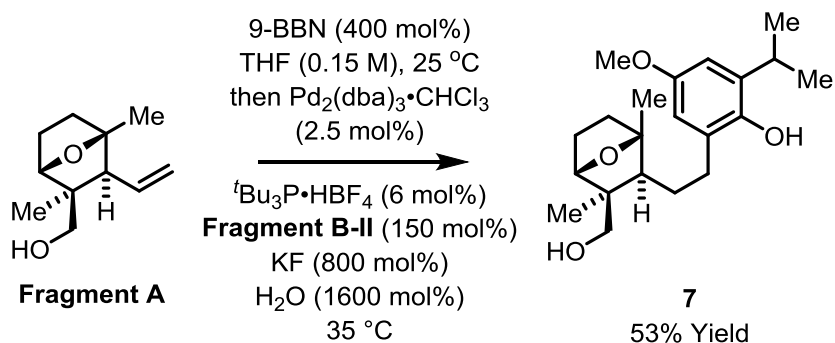

**Detailed Procedures**

To a solution of alkene (0.0547 g, 0.3 mmol, 100 mol%) in THF (0.3 mL), a solution of 9-BBN (0.146 g, 1.2 mmol, 400 mol%) in THF (1.6 mL) was added slowly at ambient temperature. The mixture was stirred at the same temperature until TLC indicated all the starting alkene was consumed (about an hour). The resulting clear solution was mixed with anhydrous KF (0.139 g, 2.4 mmol, 800 mol%), Pd<sub>2</sub>(dba)<sub>3</sub>·CHCl<sub>3</sub> (0.0078 g, 0.0075 mmol, 2.5 mol%) and <sup>t</sup>Bu<sub>3</sub>P·HBF<sub>4</sub> (0.0052 g, 0.018 mmol, 6 mol%), followed by addition of water (0.086 mL, 4.8 mmol, 1600 mol%) and the bromophenol (**Fragment B-II**, 0.110 g, 0.45 mmol, 150 mol%). The degassed heterogeneous mixture was heated to 35 °C and vigorously stirred overnight. After cooled to ambient temperature, the reaction mixture was diluted with ethyl acetate (2 mL) and water (2 mL). The separated organic layer was washed with 1 M NaOH (1 mL × 2) and brine (1 mL), and dried over anhydrous Na<sub>2</sub>SO<sub>4</sub>. The solvent was removed under reduced pressure, and the residue was submitted to flash column chromatography on silica gel (hexanes/EA = 4:1). The title compound was obtained as a colorless oil (0.0550 g, 0.16 mmol) in 53% yield.

**<sup>1</sup>H NMR** (400 MHz, CDCl<sub>3</sub>) δ 6.63 (d, *J* = 3.1 Hz, 1H), 6.50 (d, *J* = 3.1 Hz, 1H), 5.96 (br, 1H), 4.01 (d, *J* = 5.5 Hz, 1H), 3.90 (d, *J* = 11.2 Hz, 1H), 3.76 (s, 3H), 3.70 (d, *J* = 11.2 Hz, 1H), 3.20 (hept, *J* = 6.8 Hz, 1H), 3.07 (br, 1H), 2.93 (td, *J* = 12.9, 4.6 Hz, 1H), 2.37 (ddd, *J* = 13.5, 11.8, 5.5 Hz, 1H), 1.95 (ddd, *J* = 12.8, 9.0, 4.9 Hz, 1H), 1.86-1.65 (m, 3H), 1.60 (ddd, *J* = 11.5, 9.0, 4.4 Hz, 1H), 1.54-1.44 (m, 2H), 1.36 (s, 3H), 1.23 (d, *J* = 7.0 Hz, 3H), 1.21 (d, *J* = 7.0 Hz, 3H), 1.13 (s, 3H).

**<sup>13</sup>C NMR** (100 MHz, CDCl<sub>3</sub>) δ 153.3, 145.3, 136.0, 129.0, 112.4, 110.0, 87.4, 83.8, 69.1, 56.5, 55.8, 50.3, 39.4, 32.4, 28.6, 27.4, 25.8, 23.0, 22.8, 20.7, 18.9.

**R<sub>f</sub>** 0.15 (hexanes/acetone = 5:1, *p*-anisaldehyde)

**HRMS** (ESI) Calcd. for C<sub>21</sub>H<sub>32</sub>O<sub>4</sub> [M+Na]<sup>+</sup>: 371.2193, Found: 371.2195.

**FTIR** (neat): 3350, 2960, 2872, 1604, 1467, 1439, 1381, 1310, 1205, 1046, 1005, 988, 868, 828, 757 cm<sup>-1</sup>.

**Optical Rotation** [α]<sub>D</sub><sup>30</sup> = +55.7° (*c* = 0.3, CHCl<sub>3</sub>)

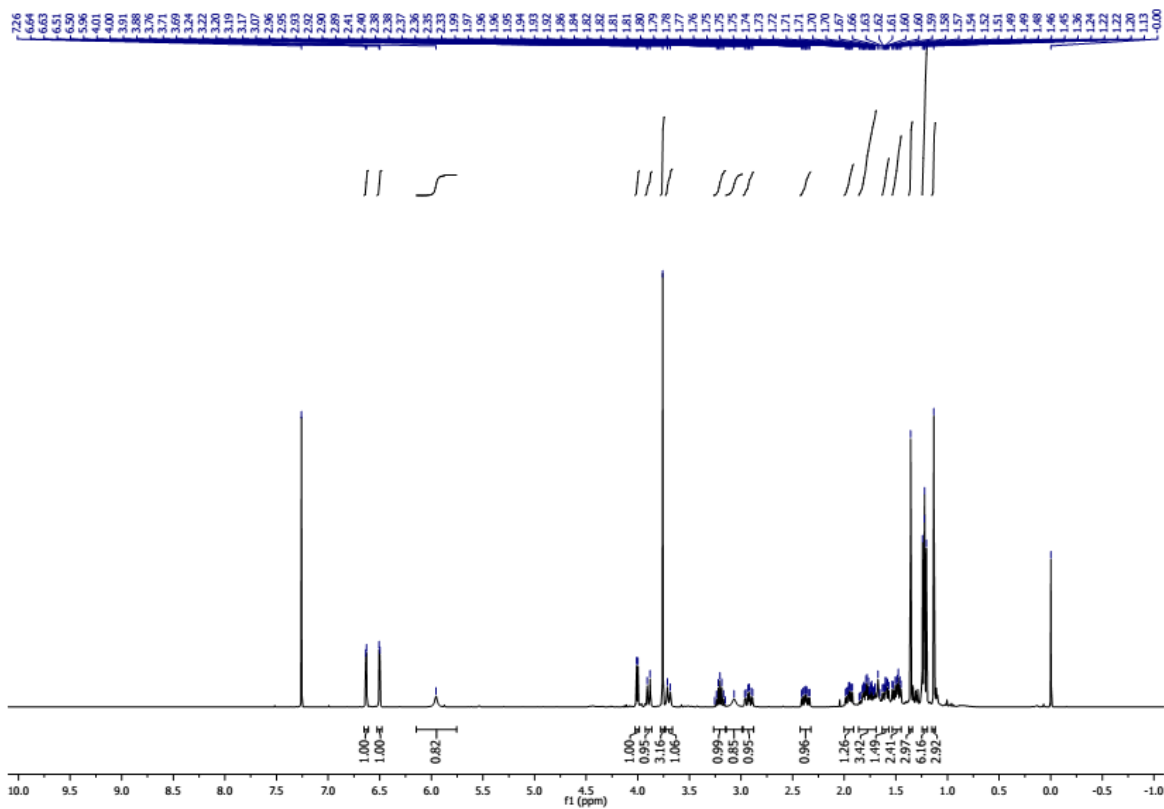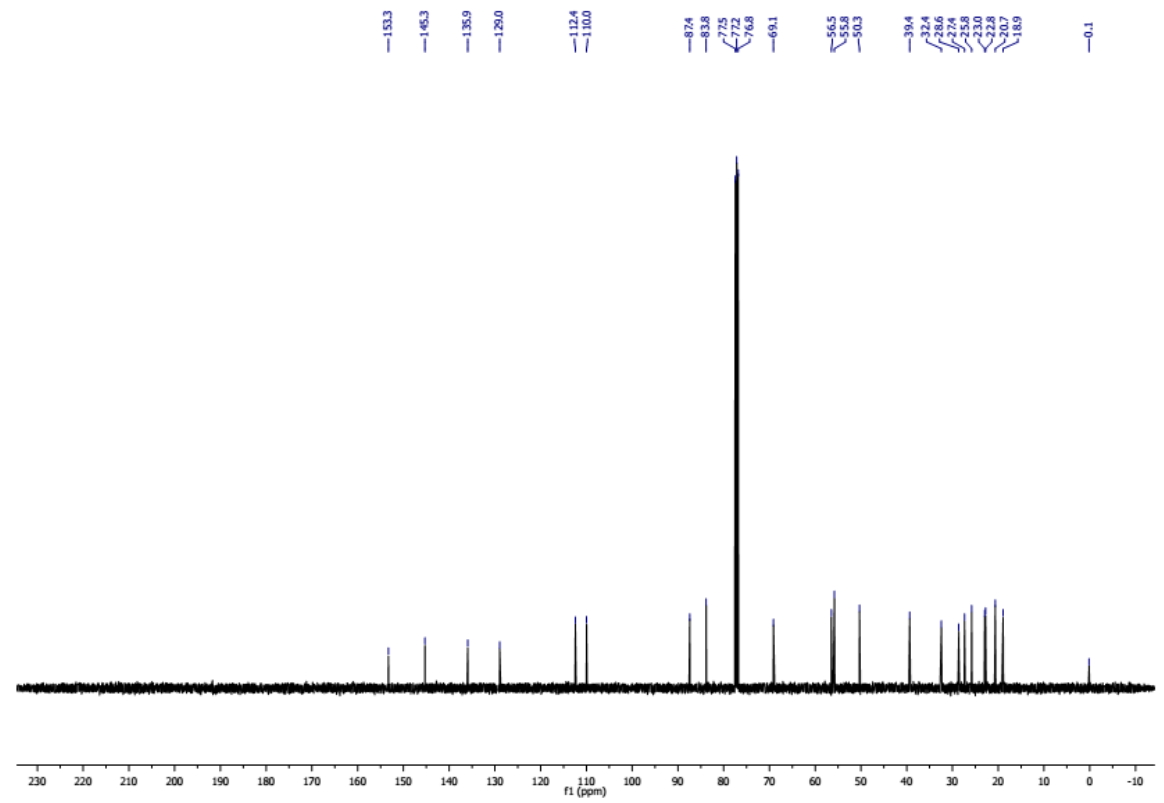

**(4*bS*,7*S*,8*S*,8*aR*)-8-(Hydroxymethyl)-2-isopropyl-4-methoxy-4*b*,8-dimethyl-4*b*,5,6,7,8,8*a*,9,10-octahydrophenanthrene-1,7-diol (8)**

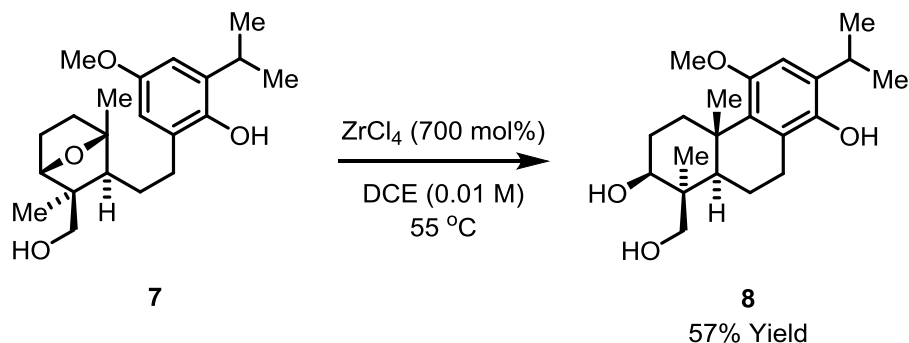

### **Detailed Procedures**

To a vigorously stirred suspension of  $\text{ZrCl}_4$  (0.197 g, 0.84 mmol, 700 mol%) in DCE (10 mL), a solution of **7** (0.0422 g, 0.12 mmol, 100 mol%) in DCE (2 mL) was added in one portion. The mixture was heated to 55 °C and allowed to stir for 11 hours. After cooled to ambient temperature, the reaction was poured into saturated  $\text{NaHCO}_3$  (aq., 20 mL) and allowed to stir for 15 min. The mixture was extracted by DCM (10 mL  $\times$  2). The combined organic layers were washed with brine (10 mL), and dried over anhydrous  $\text{Na}_2\text{SO}_4$ . The solvent was removed under reduced pressure, and the residue was submitted to flash column chromatography on silica gel (DCM/acetone = 10:1). The title compound was obtained as a white solid (0.0239 g, 0.069 mmol) in 57% yield.

**$^1\text{H NMR}$**  (500 MHz,  $\text{CDCl}_3$ )  $\delta$  6.62 (s, 1H), 4.35 (d,  $J = 11.3$  Hz, 1H), 4.29 (s, 1H), 3.78 (s, 3H), 3.54 (dd,  $J = 11.8, 4.6$  Hz, 1H), 3.41 (d,  $J = 11.3$  Hz, 1H), 3.23-3.11 (m, 2H), 2.83 (ddd,  $J = 16.6, 5.6, 1.3$  Hz, 1H), 2.56 (ddd,  $J = 16.6, 12.3, 6.9$  Hz, 1H), 2.09-1.92 (m, 2H), 1.86-1.77 (m, 1H), 1.55 (qd,  $J = 12.3, 5.5$  Hz, 1H), 1.37 (d,  $J = 12.1$  Hz, 1H), 1.34 (s, 3H), 1.34-1.28 (m, 1H), 1.28 (s, 3H), 1.27 (d,  $J = 6.9$  Hz, 3H), 1.25 (d,  $J = 6.9$  Hz, 3H).

**$^{13}\text{C NMR}$**  (125 MHz,  $\text{CDCl}_3$ )  $\delta$  152.5, 144.6, 135.0, 131.2, 123.7, 108.2, 80.7, 64.4, 55.9, 52.9, 43.6, 38.9, 34.7, 28.9, 27.5, 27.3, 23.0, 22.8, 22.6, 20.7, 18.4.

**$R_f$**  0.3 (DCM/acetone = 5:1, *p*-anisaldehyde)

**HRMS** (ESI) Calcd. for  $\text{C}_{21}\text{H}_{32}\text{O}_4$   $[\text{M}+\text{Na}]^+$ : 371.2193, Found: 371.2201.

**FTIR** (neat): 3381, 2954, 2928, 2868, 1649, 1462, 1413, 1286, 1235, 1101, 1071, 1034, 992, 976, 919, 907, 817, 755  $\text{cm}^{-1}$ .

**MP** 206.4-208.1 °C ( $\text{CHCl}_3$ )

**Optical Rotation**  $[\alpha]_{\text{D}}^{30} = +75.3^\circ$  ( $c = 0.17, \text{CHCl}_3$ )

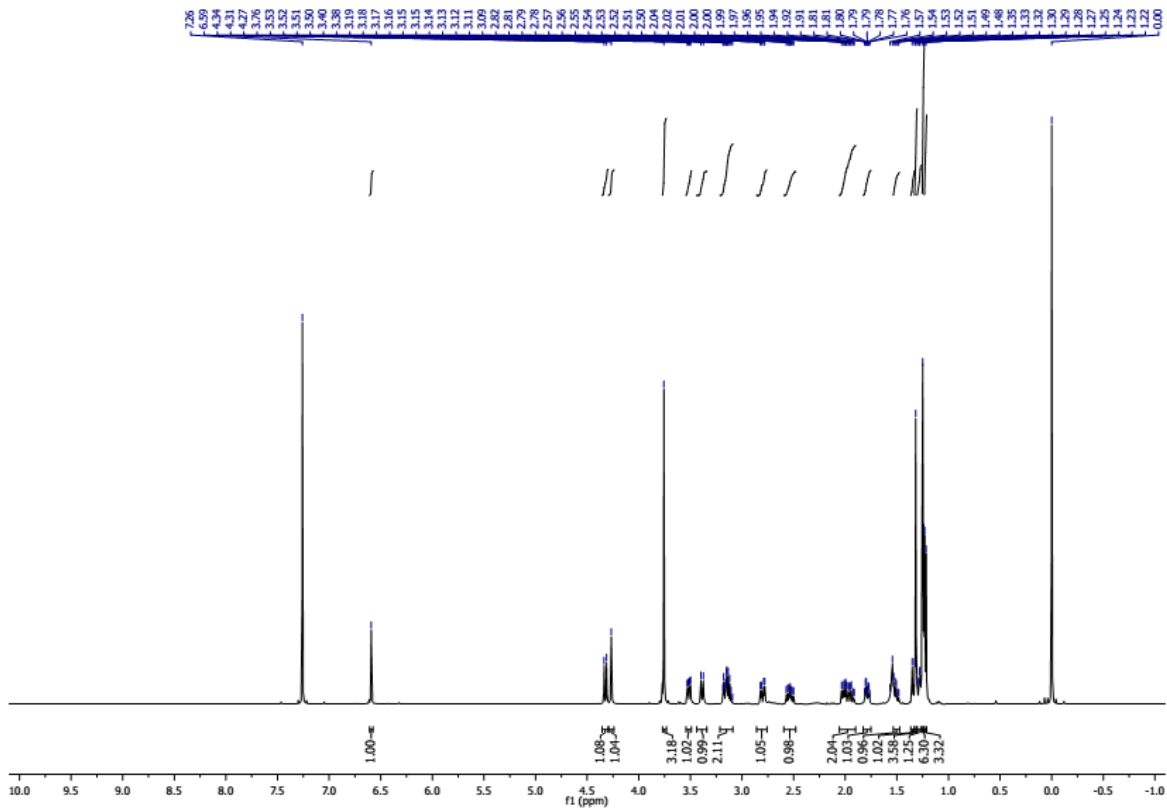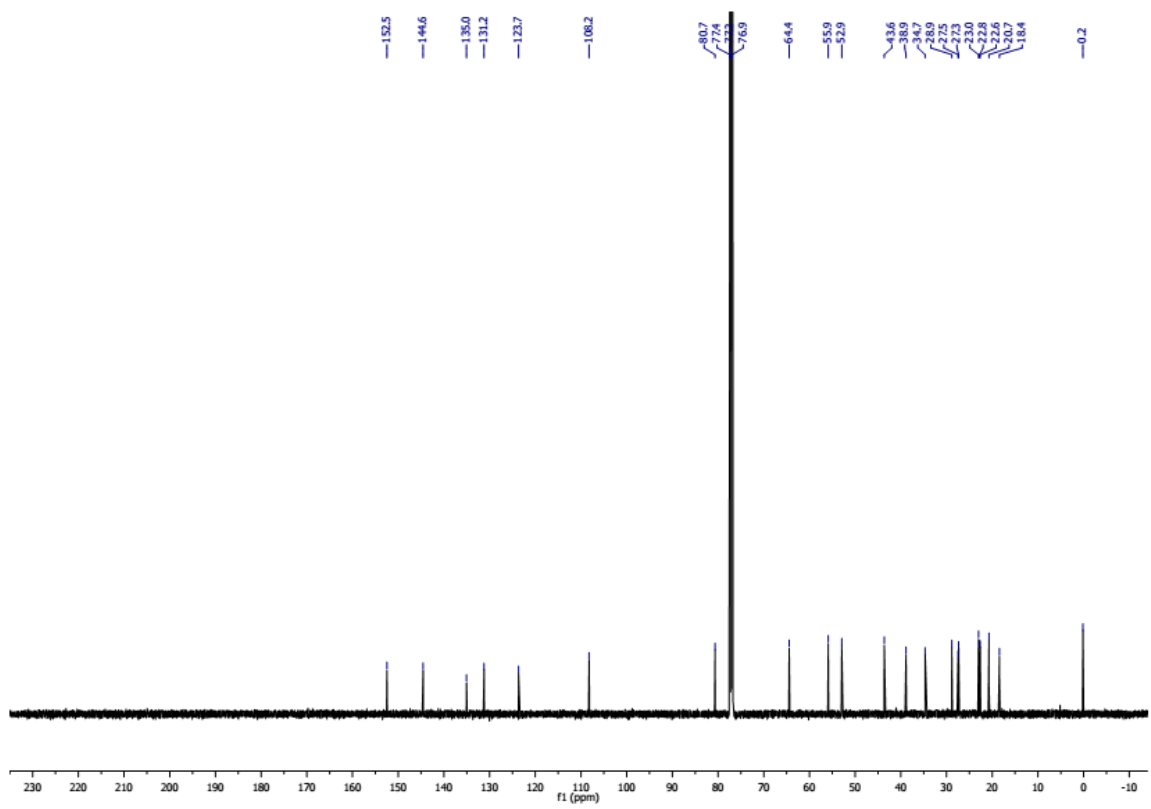

**(4*bS*,7*S*,8*S*,8*aR*)-7-Hydroxy-8-(hydroxymethyl)-2-isopropyl-4*b*,8-dimethyl-4*b*,5,6,7,8,8*a*,9,10-octahydrophenanthrene-1,4-dione ((-)-Triptoquinone C)**

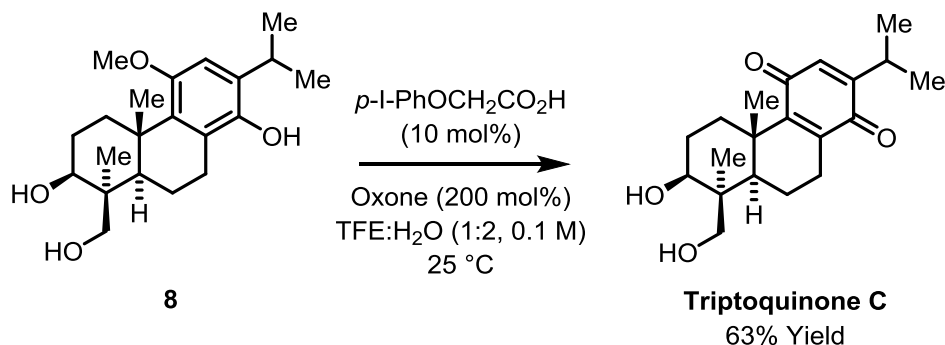

**Detailed Procedures**

To a mixture of **8** (0.0151 g, 0.043 mmol, 100 mol%) and *p*-iodo-phenoxyacetic acid<sup>3</sup> (0.0012 g, 0.0043 mmol, 10 mol%) in 2,2,2-trifluoroethanol (0.14 mL) and water (0.29 mL), Oxone<sup>®</sup> (0.0533 g, 0.087 mmol, 200 mol%) was added in one portion. The reaction turned yellow slowly, and was allowed to stir at ambient temperature for 2 hours. The mixture was diluted with ethyl acetate (2 mL), washed with water (2 mL) and saturated NaHCO<sub>3</sub> (aq., 2 mL), and dried over anhydrous Na<sub>2</sub>SO<sub>4</sub>. The solvent was removed under reduced pressure, and the residue was submitted to flash column chromatography on silica gel (hexanes/EA = 3:2). The title compound was obtained as a yellow solid (0.0091 g, 0.027 mmol) in 63% yield.

**<sup>1</sup>H NMR** (400 MHz, CDCl<sub>3</sub>) δ 6.32 (d, *J* = 1.3 Hz, 1H), 4.26 (d, *J* = 11.2 Hz, 1H), 3.49 (d, *J* = 11.8 Hz, 1H), 3.35 (t, *J* = 9.6 Hz, 1H), 2.98 (heptd, *J* = 6.9, 1.2 Hz, 1H), 2.81 (dt, *J* = 13.6, 3.6 Hz, 1H), 2.78 (br, 1H), 2.73 (ddd, *J* = 20.3, 5.7, 1.2 Hz, 1H), 2.39 (br, 1H), 2.31 (ddd, *J* = 20.3, 11.6, 7.3 Hz, 1H), 2.03-1.90 (m, 2H), 1.81 (dq, *J* = 13.5, 3.9 Hz, 1H), 1.39 (ddd, *J* = 25.0, 12.5, 5.6 Hz, 1H), 1.29 (s, 3H), 1.28-1.19 (m, 1H), 1.23 (s, 3H), 1.19 (dd, *J* = 12.5, 1.5 Hz, 1H), 1.10 (d, *J* = 6.8 Hz, 3H), 1.09 (d, *J* = 6.9 Hz, 3H).

**<sup>13</sup>C NMR** (100 MHz, CDCl<sub>3</sub>) δ 187.9, 187.8, 153.2, 149.7, 142.8, 132.1, 80.3, 64.1, 51.9, 43.3, 38.0, 34.3, 28.3, 26.6, 26.5, 22.8, 21.5, 21.5, 21.0, 17.5.

**R<sub>f</sub>** 0.2 (hexanes/EA = 3:2, UV)

**HRMS** (ESI) Calcd. for C<sub>20</sub>H<sub>28</sub>O<sub>4</sub> [M+Na]<sup>+</sup>: 355.1880, Found: 355.1880.

**FTIR** (neat): 3382, 2963, 2932, 2873, 1647, 1599, 1460, 1291, 1265, 1230, 1080, 1037, 907, 738 cm<sup>-1</sup>.

**MP** 161.0-162.0 °C (CHCl<sub>3</sub>)

**Optical Rotation** [α]<sub>D</sub><sup>30</sup> = -43.0° (*c* = 0.3, CHCl<sub>3</sub>)

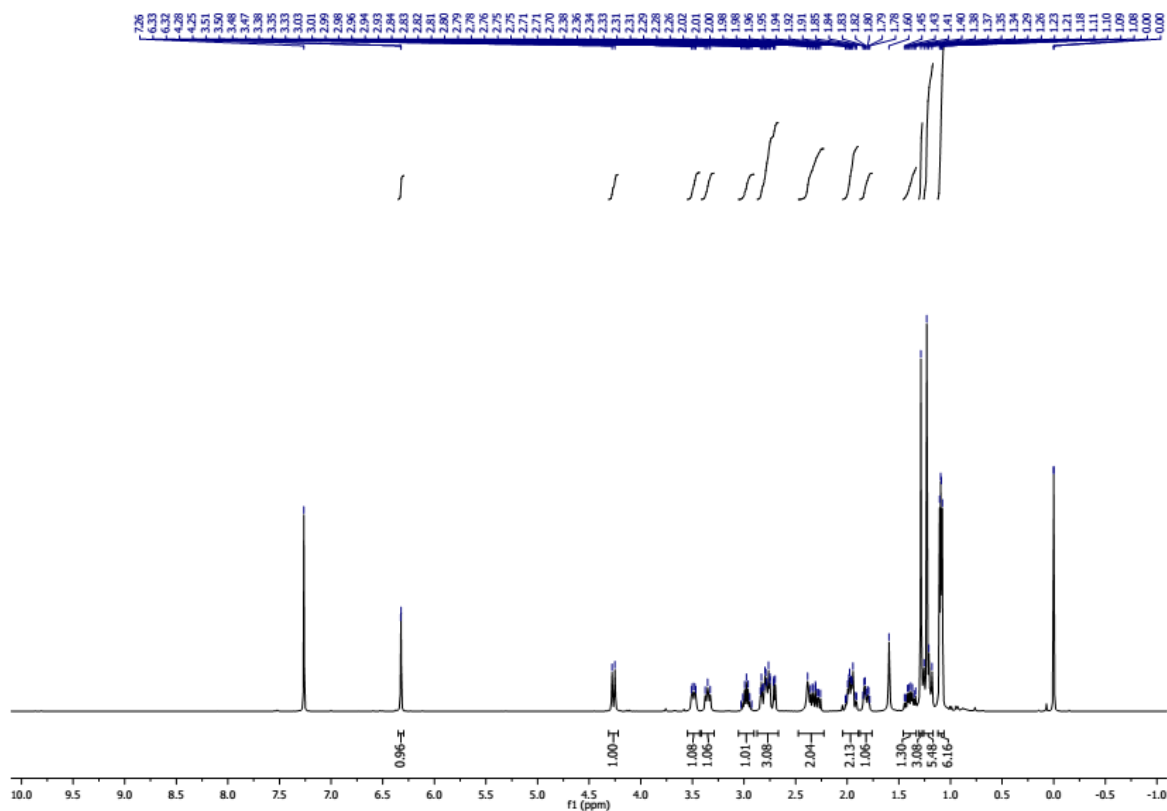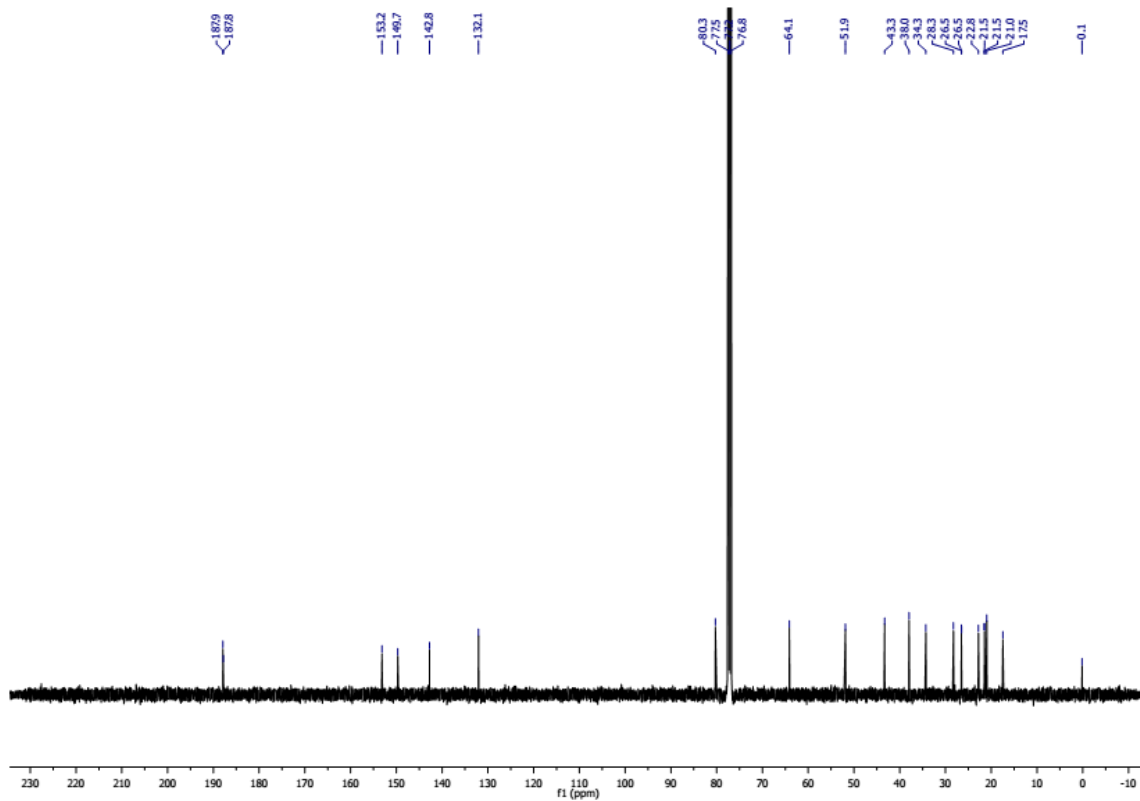



## Detailed Procedures and Spectral Data for Asymmetric Synthesis of Isoiresin

### (1*R*,2*R*)-2-(Hydroxymethyl)-2,4-dimethyl-3-vinylcyclohex-3-en-1-ol (*iso*-Fragment A)

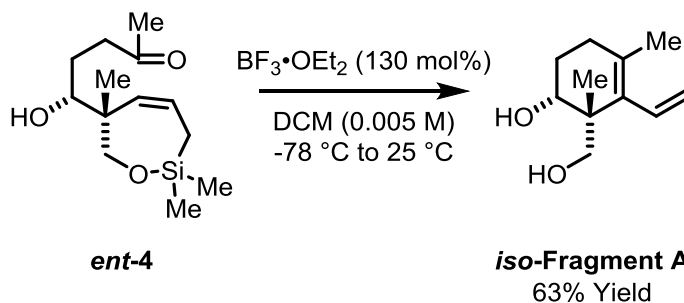

### Detailed Procedures

To a solution of *ent-4*<sup>4</sup> (0.320 g, 1.25 mmol, 100 mol%) in DCM (250 mL) at -78 °C, BF<sub>3</sub>·OEt<sub>2</sub> (0.46 mL, 3.74 mmol, 130 mol%) was added dropwise. The resulting solution was allowed to warm to ambient temperature in an hour, and stirred for 22 hours. The reaction was quenched by addition of saturated NaHCO<sub>3</sub> (aq., 250 mL) and vigorously stirred for overnight. The mixture was separated, and the aqueous layer was extracted with DCM (50 mL × 2). The combined organic layer was washed with brine (100 mL) and dried over anhydrous Na<sub>2</sub>SO<sub>4</sub>. The solvent was removed under reduced pressure (<30 °C), and the residue was submitted to flash column chromatography on a short plug of neutral alumina (Et<sub>2</sub>O/MeOH = 30:1 to 5:1). The title compound was obtained as a light brown oil (0.143 g, 0.79 mmol) in 63% yield.

**<sup>1</sup>H NMR** (400 MHz, CDCl<sub>3</sub>) δ 6.22 (ddtd, *J* = 15.3, 11.2, 2.0, 1.0 Hz, 1H), 5.32 (dd, *J* = 11.2, 2.5 Hz, 1H), 5.05 (dd, *J* = 17.7, 2.5 Hz, 1H), 3.81 (t, *J* = 4.9 Hz, 1H), 3.79 (d, *J* = 9.8 Hz, 1H), 3.59 (d, *J* = 11.5 Hz, 1H), 3.14 (br, 1H), 3.01 (br, 1H), 2.27 (dt, *J* = 16.2, 7.0 Hz, 2H), 2.02 (dt, *J* = 17.4, 5.5 Hz, 1H), 1.87 – 1.80 (m, 2H), 1.74 (d, *J* = 1.0 Hz, 3H), 1.02 (s, 3H).

**<sup>13</sup>C NMR** (100 MHz, CDCl<sub>3</sub>) δ 135.1, 132.4, 131.7, 119.5, 76.4, 68.8, 42.4, 28.5, 26.7, 22.0, 21.4.

**R<sub>f</sub>** 0.35 (hexanes/EA = 2:1 (twice), UV/*p*-anisaldehyde)

**HRMS** (ESI) Calcd. for C<sub>11</sub>H<sub>18</sub>O<sub>2</sub> [M+Na]<sup>+</sup>: 205.1199, Found: 205.1204.

**FTIR** (neat): 3348, 2969, 2931, 2875, 1431, 1375, 1250, 1231, 1217, 1200, 1093, 1044, 1019, 1003, 918, 836, 809 cm<sup>-1</sup>.

**Optical Rotation** [ $\alpha$ ]<sub>D</sub><sup>30</sup> = -8.0° (*c* = 1.0, CHCl<sub>3</sub>)



**(1*R*,2*R*)-2,4-Dimethyl-2-((pivaloyloxy)methyl)-3-vinylcyclohex-3-en-1-yl pivalate (10)**

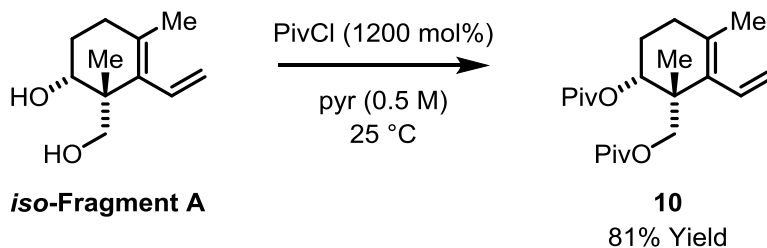

**Detailed Procedures**

To a pyridine (0.8 mL) solution of diol (0.0712 g, 0.39 mmol, 100 mol%) in an ice bath, freshly distilled pivaloyl chloride (0.58 mL, 4.7 mmol, 1200 mol%) was added slowly. White precipitate was formed immediately. The reaction mixture was allowed to warm to ambient temperature, and stirred for 18 hours. Water (1.0 mL) and DCM (1.0 mL) was added to quench the reaction. The resulting two layers were separated, and the aqueous layer was extracted with DCM (5 mL). The combined organic layers were added MeOH (3.2 mL), Et<sub>3</sub>N (0.60 mL) and DMAP (0.020 g), and stirred overnight to decompose the excess PivCl. The DCM solution was washed with 0.5 M H<sub>3</sub>PO<sub>4</sub> (5 mL) and saturated NaHCO<sub>3</sub> (aq., 5 mL × 2), and dried over anhydrous Na<sub>2</sub>SO<sub>4</sub>. The solvent was removed under reduced pressure, and the residue was submitted to flash column chromatography on silica gel (Hexanes/EA = 100:1). The title compound was obtained as a colorless oil (0.116 g, 0.33 mmol) in 81% yield, which solidified upon standing in a -20 °C freezer.

**<sup>1</sup>H NMR** (400 MHz, CDCl<sub>3</sub>) δ 6.11 (dd, *J* = 17.5, 11.2 Hz, 1H), 5.31 (dd, *J* = 11.2, 2.4 Hz, 1H), 5.01 (dd, *J* = 17.6, 2.4 Hz, 1H), 4.93 (dd, *J* = 7.1, 2.7 Hz, 1H), 4.09 (d, *J* = 10.8 Hz, 1H), 4.00 (d, *J* = 10.8 Hz, 1H), 2.20-1.90 (m, 3H), 1.81 (dddd, *J* = 13.7, 8.9, 6.7, 2.7 Hz, 1H), 1.73 (s, 3H), 1.18 (s, 9H), 1.17 (s, 9H), 1.10 (s, 3H).

**<sup>13</sup>C NMR** (100 MHz, CDCl<sub>3</sub>) δ 178.4, 177.7, 134.0, 132.2, 130.7, 120.0, 73.8, 67.4, 41.0, 39.2, 39.0, 28.5, 27.3, 27.3, 22.8, 22.3, 21.3.

**HRMS** (ESI) Calcd. for C<sub>21</sub>H<sub>34</sub>O<sub>4</sub> [M+Na]<sup>+</sup>: 373.2349, Found: 373.2350.

**FTIR** (neat): 2970, 2931, 2872, 1727, 1480, 1460, 1397, 1364, 1282, 1164, 1143, 1033, 989, 921 cm<sup>-1</sup>.

**MP** 44.4-45.3 °C (Et<sub>2</sub>O)

**Optical Rotation** [α]<sub>D</sub><sup>30</sup> = -2.2° (*c* = 0.5, CHCl<sub>3</sub>)



**Dimethyl (5*R*,6*R*,8*aR*)-5,8*a*-dimethyl-6-(pivaloyloxy)-5-((pivaloyloxy)methyl)-3,5,6,7,8,8*a*-hexahydronaphthalene-1,2-dicarboxylate (**11**)**

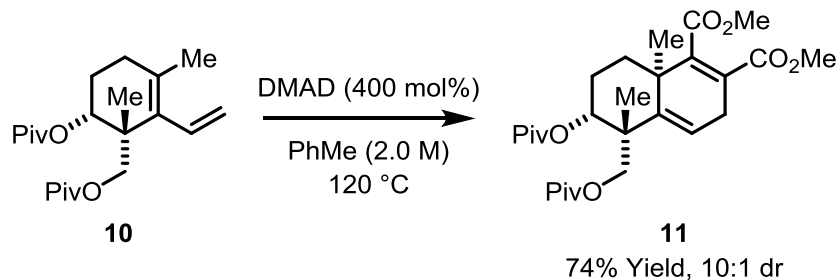

**Detailed Procedures**

To a solution of **10** (0.0905 g, 0.26 mmol, 100 mol%) in toluene (0.13 mL) was added dimethyl acetylenedicarboxylate (DMAD, 0.13 mL, 1.03 mmol, 400 mol%). The mixture was heated to 120 °C in seal tube for 24 hours. After cooled to ambient temperature, the solvent was removed under reduced pressure and the residue was submitted to flash column chromatography on silica gel (hexanes/EA = 15:1). The title compound was obtained with its inseparable diastereomer in 10:1 ratio as a white solid (0.0941 g, 0.19 mmol) in 74% yield.

**<sup>1</sup>H NMR** (400 MHz, CDCl<sub>3</sub>) δ 5.83 (dd, *J* = 5.6, 2.3 Hz, 1H (major)), 5.61\* (dd, *J* = 5.7, 2.2 Hz, 1H (minor)), 4.94-4.90\* (m, 1H (minor)), 4.63 (dd, *J* = 9.7, 5.9 Hz, 1H (major)), 4.46 (d, *J* = 11.3 Hz, 1H (major)), 4.25\* (d, *J* = 10.2 Hz, 1H (minor)), 4.05\* (d, *J* = 10.3 Hz, 1H (minor)), 4.01 (d, *J* = 11.3 Hz, 1H (major)), 3.85\* (s, 3H (minor)), 3.80 (s, 3H (major)), 3.75\* (s, 3H (minor)), 3.75 (s, 3H (major)), 3.24 (dd, *J* = 22.8, 5.5 Hz, 1H (major)), 3.21\* (dd, *J* = 22.7, 5.7 Hz, 1H (minor)), 2.86 (dd, *J* = 22.8, 2.3 Hz, 1H (major)), 2.83\* (dd, *J* = 22.6, 2.2 Hz, 1H (minor)), 2.08-1.71\* (m, 4H (minor)), 1.88-1.75 (m, 3H (major)), 1.62 (dd, *J* = 9.6, 3.4 Hz, 1H (major)), 1.47\* (s, 3H (minor)), 1.37 (s, 3H (major)), 1.32\* (s, 3H (minor)), 1.22 (s, 9H (major)), 1.20 (s, 3H (major)), 1.19\* (s, 9H (minor)), 1.17 (s, 9H (major)), 1.13\* (s, 9H (minor)).

**<sup>13</sup>C NMR** (100 MHz, CDCl<sub>3</sub>) δ 178.4, 177.7, 169.3, 166.2, 149.3, 139.3, 125.3, 123.6, 77.3, 66.6, 52.4, 52.3, 44.3, 39.2, 39.1, 38.2, 32.8, 27.4, 27.3, 27.1, 25.1, 23.3, 23.1.

**R<sub>f</sub>** 0.15 (hexanes/EA = 10:1, UV/*p*-anisaldehyde)

**HRMS** (ESI) Calcd. for C<sub>27</sub>H<sub>40</sub>O<sub>8</sub> [M+Na]<sup>+</sup>: 515.2615, Found: 515.2628.

**FTIR** (neat): 2975, 2873, 1725, 1639, 1480, 1459, 1434, 1397, 1367, 1281, 1252, 1144, 1023, 993, 768, 743 cm<sup>-1</sup>.

**MP** 63.6-65.6 °C (Et<sub>2</sub>O)

**Optical Rotation** [α]<sub>D</sub><sup>30</sup> = -18.3° (*c* = 0.4, CHCl<sub>3</sub>)

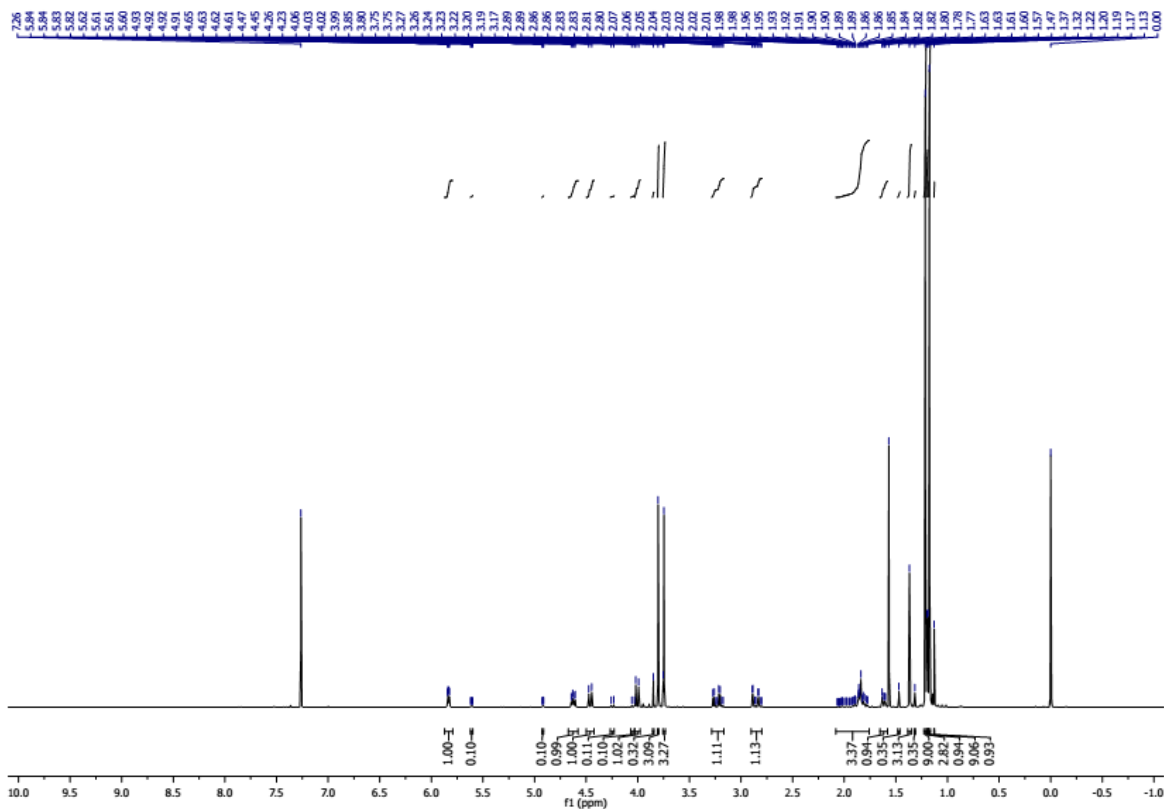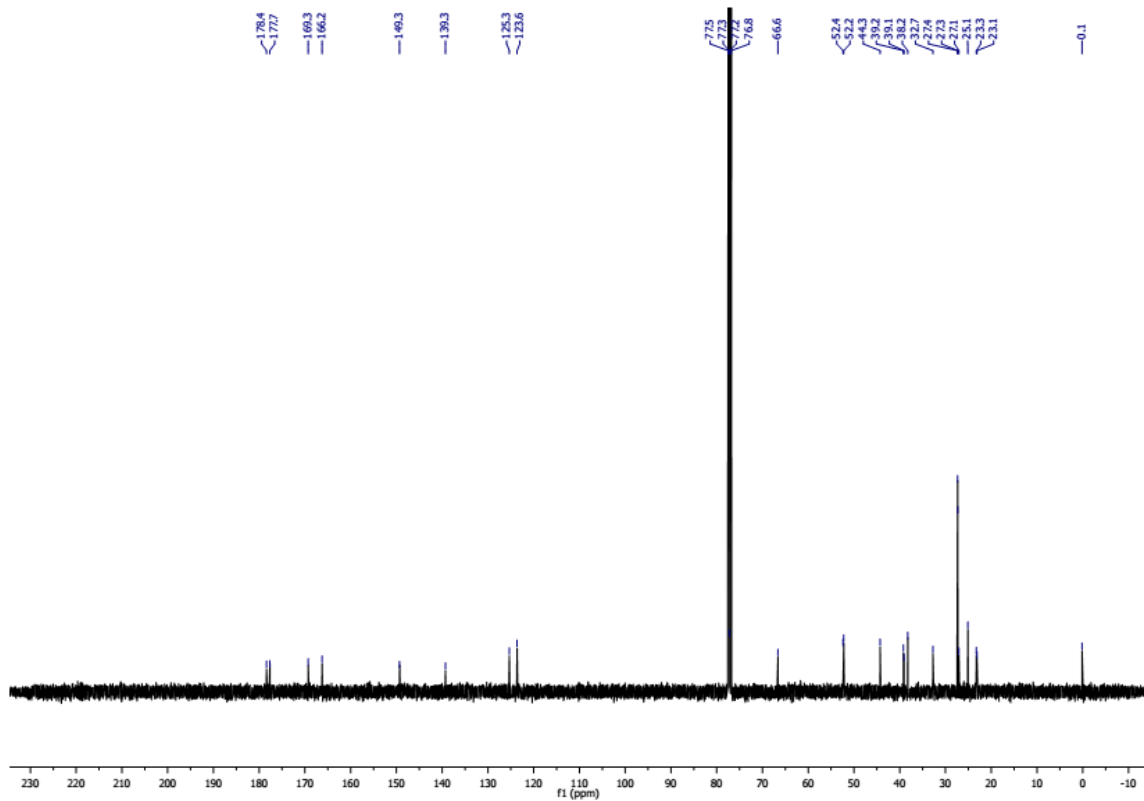

**((5*R*,6*R*,8*aR*)-6-Hydroxy-5,8*a*-dimethyl-3,5,6,7,8,8*a*-hexahydronaphthalene-1,2,5-triyl)trimethanol (**12**)**

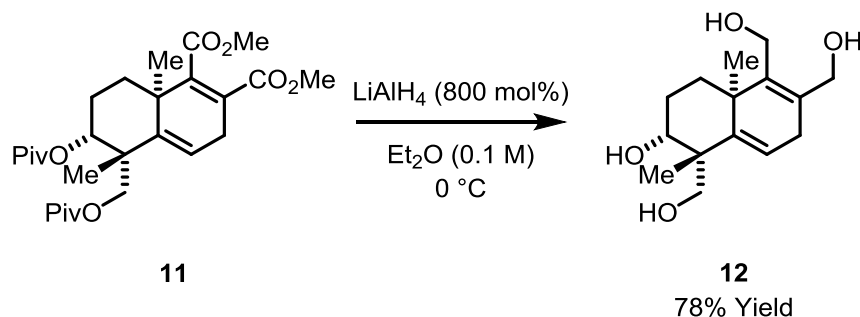

**Detailed Procedures**

To a solution of **11** (0.0507 g, 0.103 mmol, 100 mol%) in diethyl ether (1.0 mL) at 0 °C was added LiAlH<sub>4</sub> (0.0312 g, 0.823 mmol, 800 mol%). The resulting mixture was stirred vigorously at the same temperature for 2 hours. Water (0.031 mL) was slowly added to quench the reaction, followed by addition of 15% NaOH (aq., 0.031 mL) and water (0.093 mL). The mixture was allowed to stir for 10 min, and was dried over MgSO<sub>4</sub>. Silica gel was added and solvent was removed under reduced pressure. The resulting residue was directly loaded onto column and submitted to flash chromatography on silica gel (DCM/MeOH = 10:1). The title compound was obtained as a white solid (0.0216 g, 0.0805 mmol) in 78% yield.

**<sup>1</sup>H NMR** (400 MHz, CD<sub>3</sub>OD) δ 5.83 (dd, *J* = 4.9, 3.0 Hz, 1H), 4.30 (d, *J* = 12.0 Hz, 1H), 4.25 (d, *J* = 12.3 Hz, 1H), 4.14 (d, *J* = 12.0 Hz, 1H), 4.14 (d, *J* = 12.2 Hz, 1H), 3.92 (d, *J* = 11.0 Hz, 1H), 3.59 (d, *J* = 11.1 Hz, 1H), 3.37 (dd, *J* = 11.8, 4.4 Hz, 1H), 2.85 (d, *J* = 3.5 Hz, 1H), 2.84 (d, *J* = 5.3 Hz, 1H), 2.05-1.92 (m, 2H), 1.83-1.76 (m, 1H), 1.64 (td, *J* = 13.9, 3.9 Hz, 1H), 1.31 (s, 3H), 1.18 (s, 3H).

**<sup>13</sup>C NMR** (100 MHz, CD<sub>3</sub>OD) δ 144.4, 141.8, 134.6, 124.3, 78.6, 67.7, 62.8, 57.5, 47.7, 39.6, 34.8, 30.8, 28.2, 26.4, 23.2.

**R<sub>f</sub>** 0.15 (DCM/MeOH = 12.5:1, *p*-anisaldehyde)

**HRMS** (ESI) Calcd. for C<sub>15</sub>H<sub>24</sub>O<sub>4</sub> [M+Na]<sup>+</sup>: 291.1567, Found: 291.1575.

**FTIR** (neat): 3356, 2930, 2874, 1562, 1408, 1060, 1030, 1001 cm<sup>-1</sup>.

**MP** 128.0-129.0 °C (MeOH)

**Optical Rotation** [α]<sub>D</sub><sup>30</sup> = +12.2° (*c* = 0.15, CH<sub>3</sub>OH)

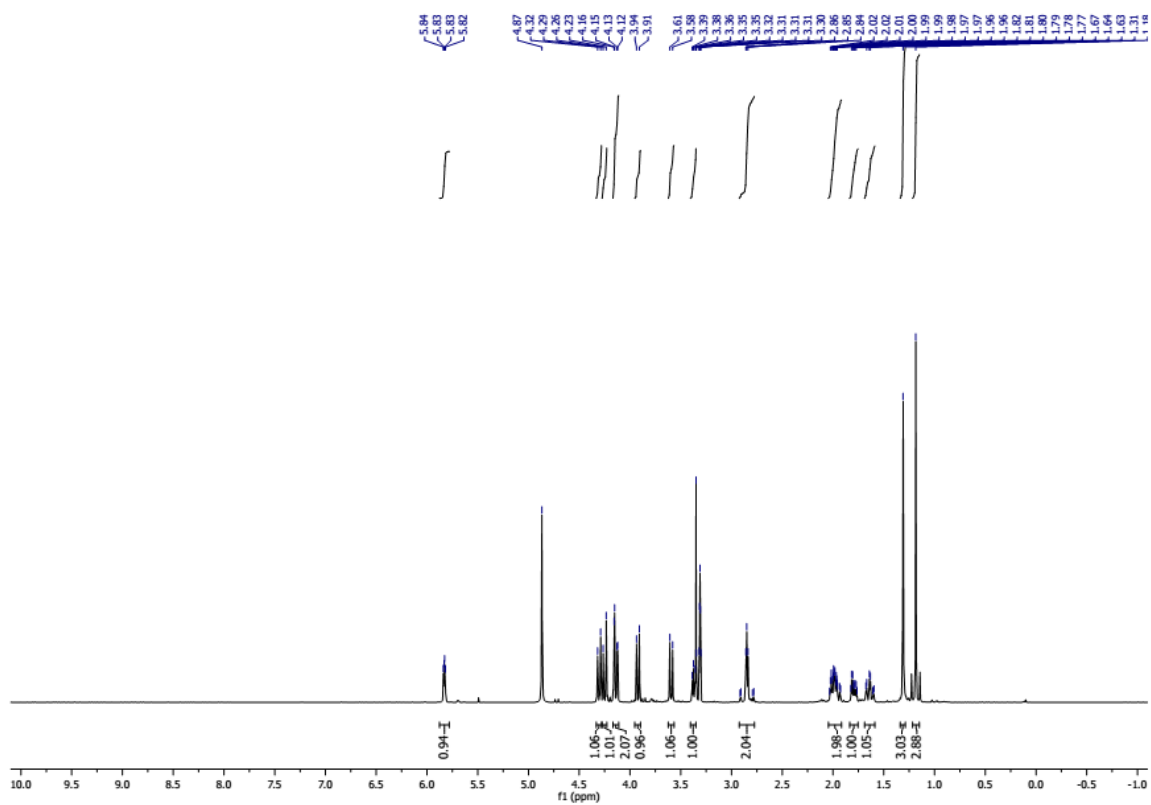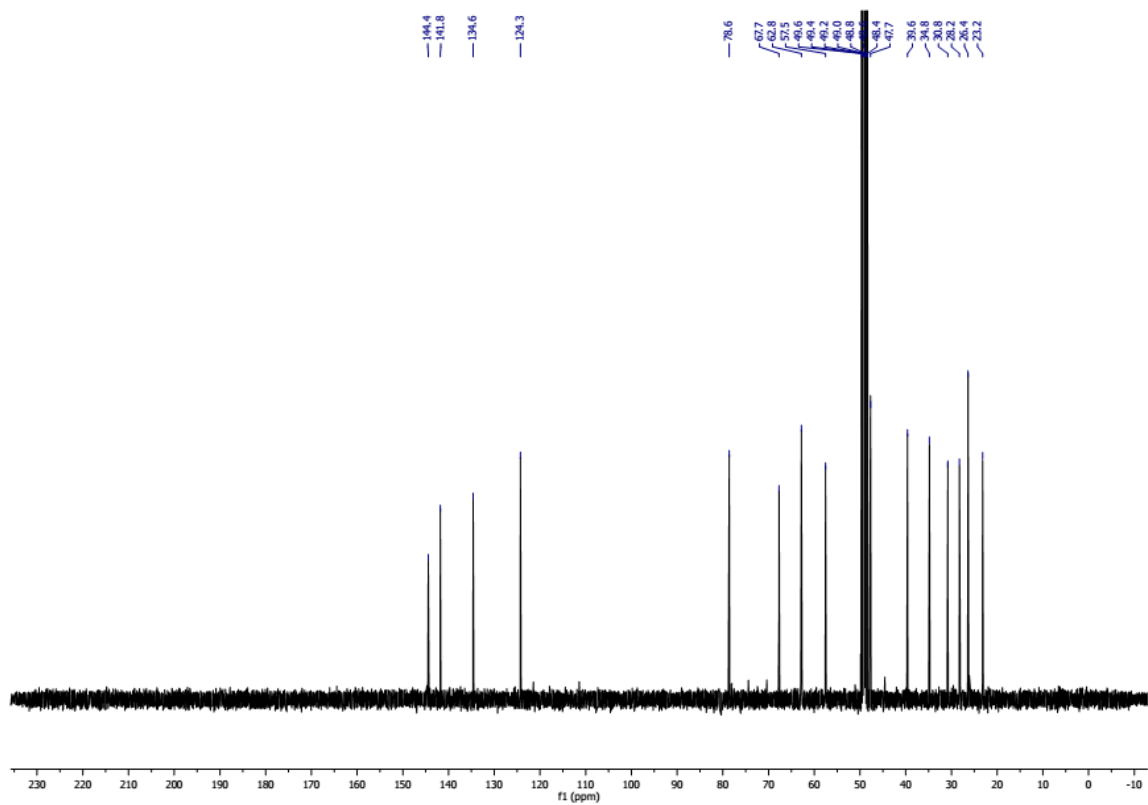



**(6*R*,7*R*,9*aR*)-7-Hydroxy-6-(hydroxymethyl)-6,9*a*-dimethyl-4,6,7,8,9,9*a*-hexahydronaphtho[1,2-*c*]furan-3(1*H*)-one (S1)**

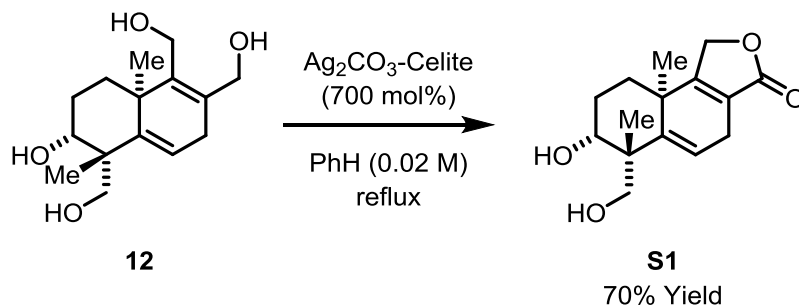

**Detailed Procedures**

A suspension of tetraol **12** (0.0300 g, 0.11 mmol, 100 mol%, dried by azeotropic distillation with benzene) and freshly made  $\text{Ag}_2\text{CO}_3\text{-Celite}^5$  (Fétizon's reagent, 0.4461g, 0.78 mmol, 700 mol%) in anhydrous benzene (5.5 mL) was heated to reflux (a portion of benzene could be removed by distillation to eliminate water in the system). The mixture was vigorously stirred until all the starting material was consumed (about 3.5 hours). The reaction was allowed to cool to ambient temperature and filter through filter paper. The precipitate was washed with MeOH (10 mL  $\times$  3), and the combined filtrate was concentrated under reduced pressure. The residue was submitted to flash column chromatography on silica gel (DCM/EA = 15:1 to DCM/MeOH = 25:1). The title compound was obtained as a colorless gel (0.0208 g, 0.079 mmol) in 70% yield.

**$^1\text{H NMR}$**  (400 MHz,  $\text{CDCl}_3$ )  $\delta$  5.97 (dd,  $J = 5.1, 2.5$  Hz, 1H), 4.87 (ddd,  $J = 16.8, 3.4, 1.4$  Hz, 1H), 4.73 (dt,  $J = 16.9, 2.6$  Hz, 1H), 4.20 (d,  $J = 11.1$  Hz, 1H), 3.54 (dd,  $J = 11.8, 3.9$  Hz, 1H), 3.51 (d,  $J = 11.9$  Hz, 1H), 3.00 (dddd,  $J = 22.4, 4.8, 2.6, 1.4$  Hz, 2H), 2.88 (dq,  $J = 22.4, 2.6$  Hz, 1H), 2.42 (br, 1H), 2.24 (br, 1H), 2.10 (tdd,  $J = 13.6, 11.8, 3.9$  Hz, 1H), 1.92 (dq,  $J = 13.5, 3.9$  Hz, 1H), 1.74 (dt,  $J = 13.1, 3.6$  Hz, 1H), 1.65 (dd,  $J = 13.4, 4.0$  Hz, 1H), 1.44 (s, 3H), 1.34 (s, 3H).

**$^{13}\text{C NMR}$**  (100 MHz,  $\text{CDCl}_3$ )  $\delta$  173.3, 167.4, 142.9, 123.3, 122.2, 77.9, 68.7, 67.9, 47.3, 37.2, 33.7, 27.2, 27.2, 22.9, 22.6.

**$R_f$**  0.20 (DCM/EA = 1:1, *p*-anisaldehyde)

**HRMS** (ESI) Calcd. for  $\text{C}_{15}\text{H}_{20}\text{O}_4$   $[\text{M}+\text{Na}]^+$ : 287.1254, Found: 287.1262.

**FTIR** (neat): 3400, 2927, 2858, 1743, 1696, 1555, 1456, 1260, 1031, 992, 799, 750, 667  $\text{cm}^{-1}$ .

**Optical Rotation**  $[\alpha]_D^{30} = +1.97^\circ$  ( $c = 0.18$ ,  $\text{CHCl}_3$ )

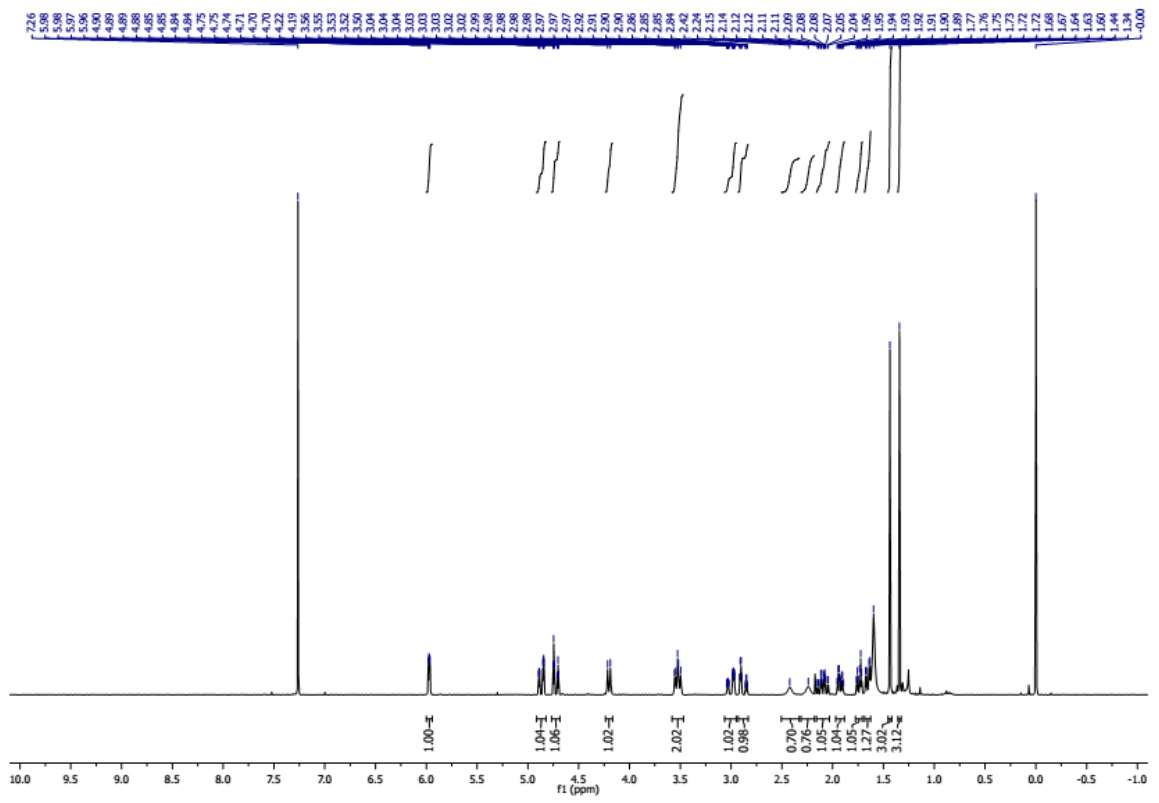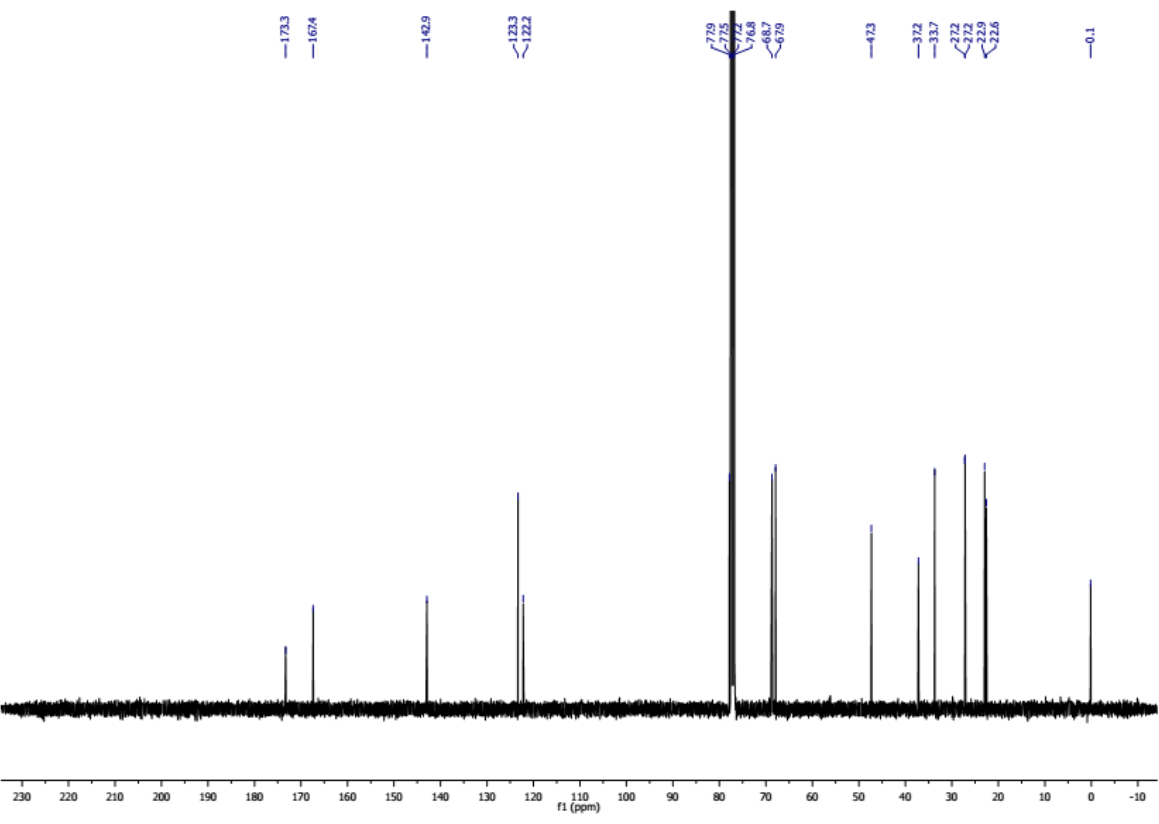

**(5a*S*,6*R*,7*R*,9a*R*)-7-Hydroxy-6-(hydroxymethyl)-6,9a-dimethyl-4,5,5a,6,7,8,9,9a-octahydronaphtho[1,2-*c*]furan-3(1*H*)-one ((-)-Isoiresin)**

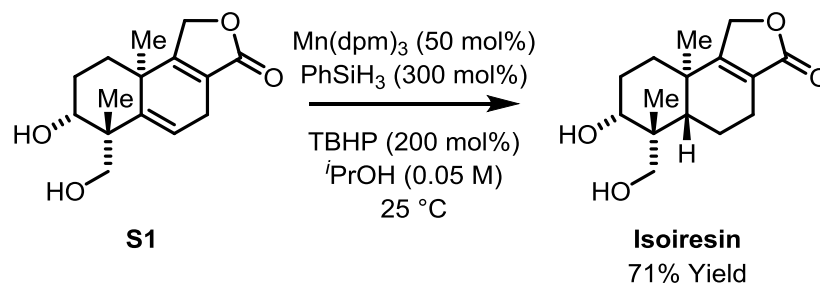

**Detailed Procedures**

To a reaction vessel containing **S1** (0.0078g, 0.030 mmol, 100 mol%) was added a degassed solution of  $\text{PhSiH}_3$  (0.011 mL, 0.089 mmol, 300 mol%) in anhydrous *iso*-propanol (0.18 mL), *tert*-butyl hydroperoxide (5.5 M in decane, 0.011 mL, 0.060 mmol, 200 mol%) and a degassed solution of  $\text{Mn(dpm)}_3^6$  (0.0089 g, 0.015 mmol, 50 mol%) in *iso*-propanol (0.59 mL). The resulting mixture was degassed by bubbling with argon for 10 seconds, and was allowed to stir at ambient temperature for 5 hours. The solvent was removed under reduced pressure and the residue was submitted to flash column chromatography on silica gel (DCM/MeOH = 50:1). The title compound was obtained as a white solid (0.0055 g, 0.021 mmol) in 71% yield.

**$^1\text{H NMR}$**  (400 MHz,  $\text{CDCl}_3$ )  $\delta$  4.73 (dt,  $J = 16.9, 2.8$  Hz, 1H), 4.64 (ddd,  $J = 16.9, 3.7, 1.6$  Hz, 1H), 4.23 (d,  $J = 11.2$  Hz, 1H), 3.52 (dd,  $J = 11.3, 4.8$  Hz, 1H), 3.41 (d,  $J = 11.2$  Hz, 1H), 2.49-2.36 (m, 1H), 2.15 (dddd,  $J = 17.8, 11.0, 6.7, 3.7, 2.8$  Hz, 1H), 2.06-1.85 (m, 3H), 1.72 (dt,  $J = 13.0, 3.5$  Hz, 1H), 1.58-1.43 (m, 2H), 1.34-1.31 (m, 1H), 1.31 (s, 3H), 1.14 (s, 3H).

**$^{13}\text{C NMR}$**  (100 MHz,  $\text{CDCl}_3$ )  $\delta$  174.0, 169.1, 123.8, 80.1, 68.1, 63.8, 51.0, 42.9, 36.0, 33.8, 27.5, 22.5, 21.7, 21.5, 18.1.

**$R_f$**  0.23 (DCM/EA = 1:1, *p*-anisaldehyde)

**HRMS** (ESI) Calcd. for  $\text{C}_{15}\text{H}_{22}\text{O}_4$   $[\text{M}+\text{Na}]^+$ : 289.1410, Found: 289.1413.

**FTIR** (neat): 3331, 2925, 2853, 1739, 1558, 1456, 1436, 1404, 1386, 1289, 1258, 1202, 1193, 1083, 1039, 1012, 991, 799, 731  $\text{cm}^{-1}$ .

**MP** 190.4-194.3  $^\circ\text{C}$  ( $\text{CHCl}_3$ )

**Optical Rotation**  $[\alpha]_D^{30} = -37.0^\circ$  ( $c = 0.18, \text{CHCl}_3$ )

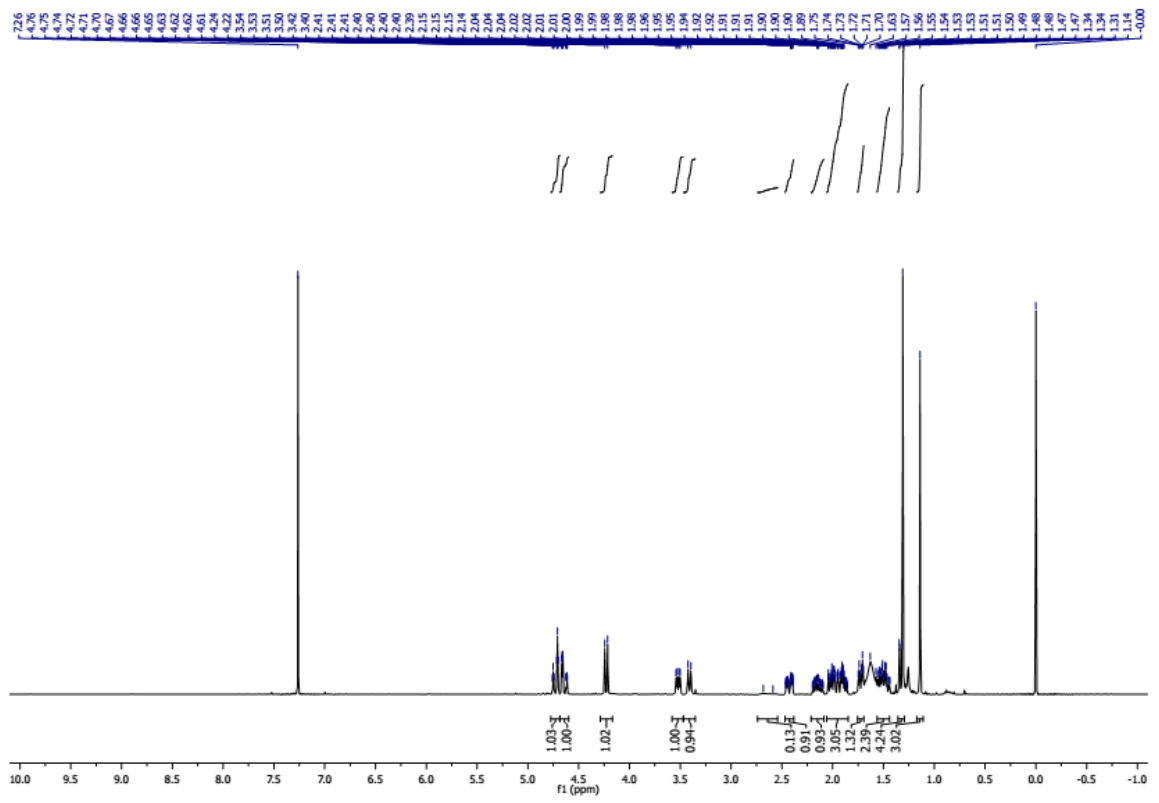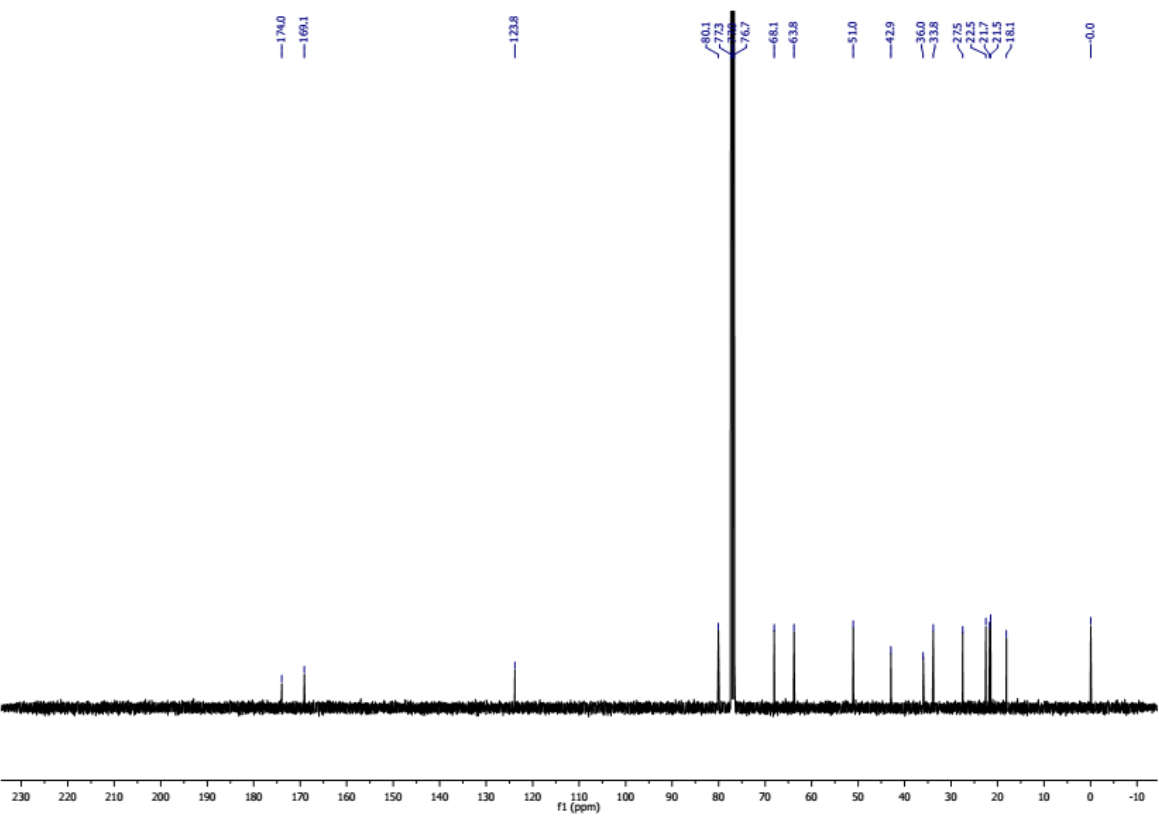

**Comparison of NMR Data between Natural and Synthetic Oridamycin A, Triptoquinone C and Isoiresin**

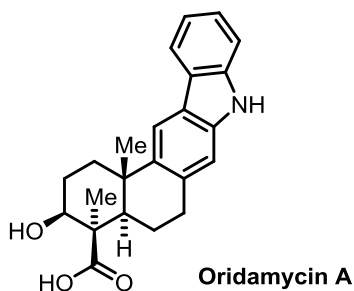

**Table S1.** <sup>1</sup>H NMR data of natural and synthetic oridamycin A

| Natural <sup>7</sup> |                                             | Synthetic 1 <sup>8</sup> |                                             | Synthetic 2 <sup>9</sup> |                                             | Synthetic (This Work) |                                             |
|----------------------|---------------------------------------------|--------------------------|---------------------------------------------|--------------------------|---------------------------------------------|-----------------------|---------------------------------------------|
| $\delta_H$<br>(ppm)  | multiplicity,<br><i>J</i> (Hz), integration | $\delta_H$<br>(ppm)      | multiplicity,<br><i>J</i> (Hz), integration | $\delta_H$<br>(ppm)      | multiplicity,<br><i>J</i> (Hz), integration | $\delta_H$<br>(ppm)   | multiplicity,<br><i>J</i> (Hz), integration |
| 7.93                 | d, 8.1, 1H                                  | 7.96                     | d, 8.0, 1 H                                 | 7.96                     | d, 8.1, 1H                                  | 7.96                  | dt, 8.1, 1.0, 1H                            |
| 7.93                 | s, 1H                                       | 7.95                     | s, 1H                                       | 7.95                     | s, 1H                                       | 7.96                  | s, 1H                                       |
| 7.32                 | d, 8.1, 1H                                  | 7.34                     | d, 8.0, 1H                                  | 7.34                     | d, 8.1, 1H                                  | 7.34                  | dt, 8.1, 0.9, 1H                            |
| 7.25                 | td, 8.1, 1.4, 1H                            | 7.28                     | t, 7.6, 1H                                  | 7.28                     | t, 7.6, 1H                                  | 7.28                  | ddd, 8.1, 7.1, 1.2, 1H                      |
| 7.05                 | td, 8.1, 1.4, 1H                            | 7.08                     | t, 7.6, 1H                                  | 7.08                     | t, 7.6, 1H                                  | 7.08                  | ddd, 8.1, 7.1, 1.2, 1H                      |
| 7.03                 | s, 1H                                       | 7.05                     | s, 1H                                       | 7.05                     | s, 1H                                       | 7.06                  | s, 1H                                       |
| 3.22                 | dd, 12.2, 4.6, 1H                           | 3.24                     | dd, 12.1, 4.3, 1H                           | 3.24                     | dd, 12.2, 4.6, 1H                           | 3.25                  | dd, 12.2, 4.4, 1H                           |
| 3.06                 | ddd, 16.3, 5.4, 2.3, 1H                     | 3.08                     | dd, 16.5, 4.0, 1H                           | 3.07                     | ddd, 16.9, 5.5, 1.9, 1H                     | 3.08                  | ddd, 17.2, 5.6, 1.9, 1H                     |
| 2.94                 | ddd, 16.7, 12.7, 2.3, 1H                    | 3.01-2.89                | m, 1H                                       | 3.00-2.92                | m, 1H                                       | 2.97                  | dddd, 16.5, 12.7, 6.2, 1.3, 1H              |
| 2.57                 | dt, 13.6, 3.6, 1H                           | 2.59                     | dd, 13.2, 2.0, 1H                           | 2.58                     | dt, 13.2, 3.6, 1H                           | 2.60                  | dt, 13.2, 3.7, 1H                           |
| 2.30                 | qd, 13.6, 3.6, 1H                           | 2.38-2.26                | m, 1H                                       | 2.32                     | dq, 13.6, 3.6, 1H                           | 2.32                  | qd, 13.3, 3.8, 1H                           |
| 2.23                 | m, 1H                                       | 2.25-2.19                | m, 1H                                       | 2.26-2.19                | m, 1H                                       | 2.28-2.19             | m, 1H                                       |
| 2.09                 | td, 12.7, 5.4, 1H                           | 2.19-2.06                | m, 1H                                       | 2.13                     | dt, 12.9, 5.4, 1H                           | 2.20-2.07             | m, 1H                                       |
| 1.90                 | dq, 13.6, 3.6, 1H                           | 1.97-1.89                | m, 1H                                       | 1.96-1.90                | m, 1H                                       | 1.93                  | dq, 13.1, 3.9, 1H                           |
| 1.58                 | td, 13.6, 4.1, 1H                           | 1.59                     | ddd, 13.6, 13.6, 3.5, 1H                    | 1.59                     | dt, 13.6, 3.9, 1H                           | 1.61                  | td, 13.5, 3.9, 1H                           |
| 1.51                 | dd, 12.2, 2.3, 1H                           | 1.51                     | d, 12.9, 1H                                 | 1.52                     | d, 12.3, 1H                                 | 1.52                  | dd, 12.2, 2.1, 1H                           |
| 1.48                 | s, 3H                                       | 1.49                     | s, 3H                                       | 1.49                     | s, 3H                                       | 1.50                  | s, 3H                                       |
| 1.26                 | s, 3H                                       | 1.27                     | s, 3H                                       | 1.27                     | s, 3H                                       | 1.28                  | s, 3H                                       |

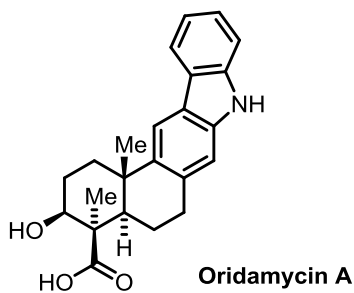

**Table S2.**  $^{13}\text{C}$  NMR data of natural and synthetic oridamycin A

| Natural <sup>7</sup>      | Synthetic 1 <sup>8</sup>  | Synthetic 2 <sup>9</sup>  | Synthetic (This Work)     |
|---------------------------|---------------------------|---------------------------|---------------------------|
| $\delta_{\text{C}}$ (ppm) | $\delta_{\text{C}}$ (ppm) | $\delta_{\text{C}}$ (ppm) | $\delta_{\text{C}}$ (ppm) |
| 181.0                     | 181.0                     | 181.0                     | 181.0                     |
| 142.0                     | 142.1                     | 142.0                     | 142.1                     |
| 140.3                     | 140.4                     | 140.3                     | 140.4                     |
| 140.1                     | 140.1                     | 140.1                     | 140.1                     |
| 134.5                     | 134.5                     | 134.5                     | 134.5                     |
| 126.1                     | 126.1                     | 126.1                     | 126.1                     |
| 124.6                     | 124.6                     | 124.6                     | 124.6                     |
| 123.2                     | 123.3                     | 123.2                     | 123.3                     |
| 120.6                     | 120.6                     | 120.6                     | 120.6                     |
| 119.3                     | 119.4                     | 119.3                     | 119.3                     |
| 117.5                     | 117.5                     | 117.5                     | 117.5                     |
| 111.4                     | 111.4                     | 111.4                     | 111.4                     |
| 110.7                     | 110.7                     | 110.7                     | 110.7                     |
| 79.1                      | 79.1                      | 79.1                      | 79.1                      |
| 54.1                      | 54.1                      | 54.1                      | 54.1                      |
| 48.7*                     | 49.8                      | 48.7                      | 49.8                      |
| 40.0                      | 40.0                      | 40.0                      | 40.0                      |
| 39.6                      | 39.6                      | 39.6                      | 39.6                      |
| 34.0                      | 34.0                      | 34.0                      | 34.0                      |
| 30.3                      | 30.3                      | 30.3                      | 30.3                      |
| 24.8                      | 24.8                      | 24.8                      | 24.8                      |
| 24.6                      | 24.6                      | 24.6                      | 24.6                      |
| 22.5                      | 22.5                      | 22.5                      | 22.5                      |

\* The peak at 48.7 ppm is buried under the solvent peaks, and there is no other evidence (such as HMBC data) to support this assignment. On the other hand, the peak at 49.8 ppm can be seen in  $^{13}\text{C}$  NMR spectra of all three synthetic oridamycin A, but the author of synthetic 2 did not assign this peak to any carbon.

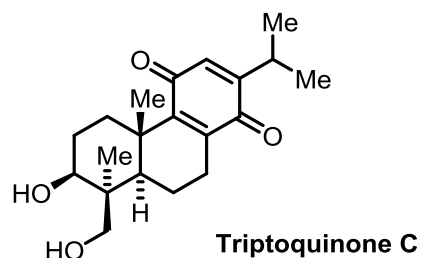

**Table S3.**  $^1\text{H}$  NMR data of natural and synthetic triptoquinone C

| <b>Natural<sup>10</sup></b> |                                     | <b>Synthetic</b>          |                                     |
|-----------------------------|-------------------------------------|---------------------------|-------------------------------------|
| $\delta_{\text{H}}$ (ppm)   | multiplicity, $J$ (Hz), integration | $\delta_{\text{H}}$ (ppm) | multiplicity, $J$ (Hz), integration |
| 6.32                        | d, 1.0, 1H                          | 6.32                      | d, 1.3, 1H                          |
| 4.26                        | ABq, 11.2, 1H                       | 4.26                      | d, 11.2, 1H                         |
| 3.48                        | dd, 11.7, 4.9, 1H                   | 3.49                      | d, 11.8, 1H                         |
| 3.35                        | ABq, 11.2, 1H                       | 3.35                      | t, 9.6, 1H                          |
| 2.98                        | heptd, 6.8, 1.0, 1H                 | 2.98                      | heptd, 6.9, 1.2, 1H                 |
| 2.81                        | ddd, 13.7, 3.9, 3.9, 1H             | 2.81                      | dt, 13.6, 3.6, 1H                   |
| 2.73                        | dd, 20.5, 4.9, 1H                   | 2.73                      | ddd, 20.3, 5.7, 1.2, 1H             |
| 2.31                        | ddd, 20.5, 11.7, 7.3, 1H            | 2.31                      | ddd, 20.3, 11.6, 7.3, 1H            |
| 2.01-1.91                   | m, 2H                               | 2.03-1.90                 | m, 2H                               |
| 1.81                        | ddd, 13.7, 8.3, 3.9, 1H             | 1.81                      | dq, 13.5, 3.9, 1H                   |
| 1.38                        | m, 1H                               | 1.39                      | ddd, 25.0, 12.5, 5.6, 1H            |
| 1.29                        | s, 3H                               | 1.29                      | s, 3H                               |
| 1.25                        | m, 1H                               | 1.28-1.19                 | m, 1H                               |
| 1.23                        | s, 3H                               | 1.23                      | s, 3H                               |
| 1.19                        | d, 11.7, 1H                         | 1.19                      | dd, 12.5, 1.5, 1H                   |
| 1.10                        | d, 6.8, 3H                          | 1.10                      | d, 6.8, 3H                          |
| 1.09                        | d, 6.8, 3H                          | 1.09                      | d, 6.9, 3H                          |

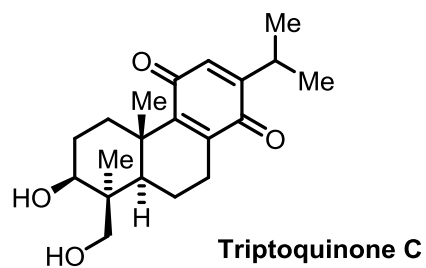

**Table S4.**  $^{13}\text{C}$  NMR data of natural and synthetic triptoquinone C

| Natural <sup>10</sup>     | Synthetic                 |
|---------------------------|---------------------------|
| $\delta_{\text{C}}$ (ppm) | $\delta_{\text{C}}$ (ppm) |
| 187.8                     | 187.9                     |
| 187.7                     | 187.8                     |
| 153.1                     | 153.2                     |
| 149.6                     | 149.7                     |
| 142.7                     | 142.8                     |
| 131.9                     | 132.1                     |
| 80.0                      | 80.3                      |
| 64.0                      | 64.1                      |
| 51.8                      | 51.9                      |
| 43.1                      | 43.3                      |
| 37.8                      | 38.0                      |
| 34.2                      | 34.3                      |
| 28.1                      | 28.3                      |
| 26.4                      | 26.6                      |
| 26.3                      | 26.5                      |
| 22.3                      | 22.8                      |
| 21.3                      | 21.5                      |
| 21.3                      | 21.5                      |
| 20.9                      | 21.0                      |
| 17.4                      | 17.5                      |



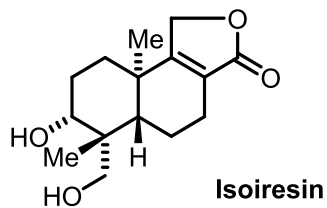

**Table S5.**  $^1\text{H}$  NMR data of synthetic isoiresin

| <b>Synthetic 1<sup>11</sup></b> |                                     | <b>Synthetic (This Work)</b> |                                     |
|---------------------------------|-------------------------------------|------------------------------|-------------------------------------|
| $\delta_{\text{H}}$ (ppm)       | multiplicity, $J$ (Hz), integration | $\delta_{\text{H}}$ (ppm)    | multiplicity, $J$ (Hz), integration |
| 4.76-4.62                       | m, 2H                               | 4.73                         | dt, 16.9, 2.8, 1H                   |
|                                 |                                     | 4.64                         | ddd, 16.9, 3.7, 1.6, 1H             |
| 4.23                            | dd, 11.2, 2.0, 1H                   | 4.23                         | d, 11.2, 1H                         |
| 3.54-3.49                       | m, 1H                               | 3.52                         | dd, 11.3, 4.8, 1H                   |
| 3.41                            | t, 9.6, 1H                          | 3.41                         | d, 11.2, 1H                         |
| 2.72*                           | dd, 8.8, 2.4, 1H                    | 2.68*                        | br                                  |
| 2.61*                           | d, 4.0, 1H                          | 2.59*                        | br                                  |
| 2.43                            | dt, 18.0, 2.8, 1H                   | 2.49-2.36                    | m, 1H                               |
| 2.17-2.10                       | m, 1H                               | 2.15                         | dddd, 17.8, 11.0, 6.7, 3.7, 2.8, 1H |
| 2.03-1.86                       | m, 3H                               | 2.06-1.85                    | m, 3H                               |
| 1.73                            | ddd, 12.8, 3.2, 3.2, 1H             | 1.72                         | dt, 13.0, 3.5, 1H                   |
| 1.53-1.45                       | m, 2H                               | 1.58-1.43                    | m, 2H                               |
|                                 |                                     | 1.34-1.31 <sup>#</sup>       | m, 1H                               |
| 1.31                            | s, 3H                               | 1.31                         | s, 3H                               |
| 1.14                            | s, 3H                               | 1.14                         | s, 3H                               |

\* Alcoholic protons

# The authors in ref. 11 only identified 21 out of 22 protons in isoiresin. They did not indicate this proton, but it was seen in the spectrum they provided.



**Table S6.**  $^{13}\text{C}$  NMR data of synthetic isoiresin

| <b>Synthetic 1<sup>11</sup></b> | <b>Synthetic (This Work)</b> |
|---------------------------------|------------------------------|
| $\delta_{\text{C}}$ (ppm)       | $\delta_{\text{C}}$ (ppm)    |
| 174.0                           | 174.0                        |
| 169.2                           | 169.1                        |
| 123.8                           | 123.8                        |
| 80.1                            | 80.1                         |
| 68.1                            | 68.1                         |
| 63.8                            | 63.8                         |
| 51.0                            | 51.0                         |
| 42.9                            | 42.9                         |
| 36.0                            | 36.0                         |
| 33.8                            | 33.8                         |
| 27.5                            | 27.5                         |
| 22.6                            | 22.5                         |
| 21.7                            | 21.7                         |
| 21.5                            | 21.5                         |
| 18.1                            | 18.1                         |

## **Crystallographic Material for 5**

### **X-ray Experimental for C<sub>17</sub>H<sub>15</sub>NO<sub>2</sub> (5)**

Crystals grew as thin, colorless plates by slow evaporation from chloroform. The data crystal was cut from a larger crystal and had approximate dimensions: 0.29 x 0.20 x 0.03 mm. The data were collected on an Agilent Technologies SuperNova Dual Source diffractometer using a  $\mu$ -focus Cu K $\alpha$  radiation source ( $\lambda = 1.5418 \text{ \AA}$ ) with collimating mirror monochromators. A total of 990 frames of data were collected using  $\omega$ -scans with a scan range of  $1^\circ$  and a counting time of 10 seconds per frame with a detector offset of  $\pm 40.6^\circ$  and 40 seconds per frame with a detector offset of  $\pm 108.3^\circ$ . The data were collected at 100 K using an Oxford Cryostream low temperature device. Details of crystal data, data collection and structure refinement are listed in Table 1. Data reduction were performed using Agilent Technologies CrysAlisPro V 1.171.37.31.<sup>12</sup> The structure was solved by direct methods using SuperFlip<sup>13</sup> and refined by full-matrix least-squares on  $F^2$  with anisotropic displacement parameters for the non-H atoms using SHELXL-2013.<sup>14</sup> Structure analysis was aided by use of the programs PLATON98<sup>15</sup> and WinGX.<sup>16</sup> The hydrogen atoms were calculated in ideal positions with isotropic displacement parameters set to  $1.2xU_{eq}$  of the attached atom ( $1.5xU_{eq}$  for methyl hydrogen atoms).

For six of the eight molecules in the unit cell, the carbazole moiety was disordered by rotation about the bond from the carbazole to a methylene carbon atom. The rings were disordered to differing degrees but were all modeled in the same fashion. The site occupancy factors for one component of the disordered carbazole were assigned to the variable  $x$ . The site occupancy factors for the alternate component were set to  $(1-x)$ . A common isotropic displacement parameter was refined for the non-H atoms of both components while refining  $x$ . The geometry of the two components were restrained to be equivalent throughout the refinement process. The non-H atoms of the two components were refined anisotropically with their displacement parameters restrained to be approximately isotropic.

The function,  $\sum w(|F_o|^2 - |F_c|^2)^2$ , was minimized, where  $w = 1/[(\sigma(F_o))^2 + (0.01064*P)^2 + (1.475*P)]$  and  $P = (|F_o|^2 + 2|F_c|^2)/3$ .  $R_w(F^2)$  refined to 0.212, with  $R(F)$  equal to 0.0786 and a goodness of fit,  $S$ , = 1.07. Definitions used for calculating  $R(F)$ ,  $R_w(F^2)$  and the goodness of fit,  $S$ , are given below.<sup>17</sup> The data were checked for secondary extinction effects but no correction was necessary. Neutral atom scattering factors and values used to calculate the linear absorption coefficient are from the International Tables for X-ray Crystallography (1992).<sup>18</sup> All figures were generated using SHELXTL/PC.<sup>19</sup> Tables of positional and thermal parameters, bond lengths and angles, torsion angles and figures are found elsewhere.

**Table S7.** Crystal data and structure refinement for **5**.

|                                   |                                                 |                 |
|-----------------------------------|-------------------------------------------------|-----------------|
| Empirical formula                 | C <sub>23</sub> H <sub>27</sub> NO <sub>2</sub> |                 |
| Formula weight                    | 349.45                                          |                 |
| Temperature                       | 100(2) K                                        |                 |
| Wavelength                        | 1.54184 Å                                       |                 |
| Crystal system                    | triclinic                                       |                 |
| Space group                       | P 1                                             |                 |
| Unit cell dimensions              | a = 11.7783(4) Å                                | α = 79.911(3)°. |
|                                   | b = 14.8717(5) Å                                | β = 84.025(3)°. |
|                                   | c = 21.5048(11) Å                               | γ = 89.908(3)°. |
| Volume                            | 3687.9(3) Å <sup>3</sup>                        |                 |
| Z                                 | 8                                               |                 |
| Density (calculated)              | 1.259 Mg/m <sup>3</sup>                         |                 |
| Absorption coefficient            | 0.622 mm <sup>-1</sup>                          |                 |
| F(000)                            | 1504                                            |                 |
| Crystal size                      | 0.29 x 0.20 x 0.03 mm                           |                 |
| Theta range for data collection   | 3.019 to 74.573°.                               |                 |
| Index ranges                      | -14<=h<=14, -18<=k<=16, -26<=l<=26              |                 |
| Reflections collected             | 22860                                           |                 |
| Independent reflections           | 22860 [R(int) = ?]                              |                 |
| Completeness to theta = 67.684°   | 99.5 %                                          |                 |
| Absorption correction             | Semi-empirical from equivalents                 |                 |
| Max. and min. transmission        | 1.00 and 0.851                                  |                 |
| Refinement method                 | Full-matrix least-squares on F <sup>2</sup>     |                 |
| Data / restraints / parameters    | 22860 / 7267 / 2566                             |                 |
| Goodness-of-fit on F <sup>2</sup> | 1.068                                           |                 |
| Final R indices [I>2sigma(I)]     | R1 = 0.0786, wR2 = 0.2037                       |                 |
| R indices (all data)              | R1 = 0.0843, wR2 = 0.2115                       |                 |
| Absolute structure parameter      | 0.10(16)                                        |                 |
| Extinction coefficient            | n/a                                             |                 |
| Largest diff. peak and hole       | 0.658 and -0.502 e.Å <sup>-3</sup>              |                 |

**Table S8.** Atomic coordinates ( $\times 10^4$ ) and equivalent isotropic displacement parameters ( $\text{\AA}^2 \times 10^3$ ) for **5**. U(eq) is defined as one third of the trace of the orthogonalized  $U^{ij}$  tensor.

|      | x        | y        | z        | U(eq) |
|------|----------|----------|----------|-------|
| O1   | -1733(6) | 9117(4)  | 8745(4)  | 45(1) |
| O2   | -390(5)  | 11392(4) | 8522(4)  | 40(1) |
| N1   | 2564(8)  | 9402(5)  | 4899(5)  | 32(2) |
| C12  | 872(13)  | 8579(6)  | 6500(18) | 35(2) |
| C13  | -12(12)  | 8243(6)  | 6245(7)  | 34(2) |
| C14  | -96(10)  | 8268(6)  | 5587(6)  | 28(2) |
| C15  | 838(10)  | 8682(5)  | 5168(7)  | 24(2) |
| C16  | 1770(11) | 9039(6)  | 5397(7)  | 27(2) |
| C17  | 1849(11) | 9011(6)  | 6068(8)  | 31(2) |
| C18  | 1031(11) | 8817(5)  | 4498(7)  | 26(2) |
| C19  | 521(10)  | 8654(6)  | 3983(8)  | 24(2) |
| C20  | 984(13)  | 8894(7)  | 3369(7)  | 28(2) |
| C21  | 2057(14) | 9342(7)  | 3234(7)  | 33(2) |
| C22  | 2625(11) | 9527(6)  | 3738(10) | 30(2) |
| C23  | 2161(14) | 9289(7)  | 4328(8)  | 31(2) |
| N1D  | 56(12)   | 8347(7)  | 4923(8)  | 29(2) |
| C12D | 849(19)  | 8480(8)  | 6500(30) | 35(2) |
| C13D | 1884(15) | 8918(8)  | 6388(12) | 32(3) |
| C14D | 2231(16) | 9141(9)  | 5732(11) | 28(3) |
| C15D | 1620(20) | 8951(10) | 5248(12) | 28(2) |
| C16D | 552(19)  | 8486(9)  | 5448(12) | 27(2) |
| C17D | 110(20)  | 8230(10) | 6060(12) | 29(3) |
| C18D | 1800(18) | 9107(9)  | 4558(12) | 28(2) |
| C19D | 2628(19) | 9503(10) | 4102(14) | 28(3) |
| C20D | 2500(20) | 9528(11) | 3458(14) | 30(3) |
| C21D | 1510(30) | 9147(13) | 3283(11) | 30(3) |
| C22D | 669(18)  | 8747(10) | 3709(15) | 26(3) |
| C23D | 785(18)  | 8717(9)  | 4348(13) | 26(2) |
| C1   | 73(7)    | 9770(6)  | 8596(4)  | 32(2) |

|     |           |          |         |       |
|-----|-----------|----------|---------|-------|
| C2  | -927(7)   | 9471(5)  | 9101(5) | 37(2) |
| C3  | -697(10)  | 8624(6)  | 9581(5) | 50(2) |
| C4  | -737(9)   | 7853(6)  | 9196(5) | 46(2) |
| C5  | -991(8)   | 8394(6)  | 8550(5) | 43(2) |
| C6  | 123(8)    | 8914(6)  | 8239(5) | 38(2) |
| C7  | 1203(10)  | 9924(9)  | 8842(6) | 54(3) |
| C8  | -258(7)   | 10652(5) | 8171(5) | 37(2) |
| C9  | -1658(12) | 7861(7)  | 8164(6) | 66(3) |
| C10 | 278(9)    | 9145(7)  | 7512(5) | 46(2) |
| C11 | 835(14)   | 8373(10) | 7198(6) | 74(3) |
| O3  | 4270(5)   | 5589(4)  | 8978(3) | 31(1) |
| O4  | 1658(5)   | 6833(4)  | 8546(4) | 41(1) |
| N2  | 4939(6)   | 8319(5)  | 5127(4) | 34(1) |
| C24 | 3637(6)   | 7066(5)  | 8771(4) | 28(1) |
| C25 | 3614(6)   | 6220(5)  | 9302(4) | 28(1) |
| C26 | 4328(7)   | 6332(6)  | 9842(4) | 37(2) |
| C27 | 5542(7)   | 6253(6)  | 9521(4) | 37(2) |
| C28 | 5334(6)   | 6144(5)  | 8839(4) | 29(1) |
| C29 | 4922(6)   | 7072(5)  | 8493(4) | 25(1) |
| C30 | 3280(7)   | 7940(5)  | 9005(4) | 37(2) |
| C31 | 2840(6)   | 6875(5)  | 8289(4) | 32(1) |
| C32 | 6216(7)   | 5617(6)  | 8500(5) | 39(2) |
| C33 | 5197(7)   | 7262(5)  | 7772(4) | 29(1) |
| C34 | 4996(8)   | 8258(5)  | 7470(4) | 33(2) |
| C35 | 5473(7)   | 8487(5)  | 6782(4) | 30(1) |
| C36 | 6560(7)   | 8904(5)  | 6615(4) | 32(2) |
| C37 | 7073(7)   | 9113(5)  | 6004(4) | 29(1) |
| C38 | 6464(6)   | 8869(5)  | 5528(4) | 28(1) |
| C39 | 5381(7)   | 8458(5)  | 5680(4) | 30(2) |
| C40 | 4882(8)   | 8241(5)  | 6314(4) | 32(2) |
| C41 | 6698(7)   | 9015(5)  | 4844(4) | 28(1) |
| C42 | 7603(7)   | 9388(5)  | 4394(4) | 31(2) |
| C43 | 7528(8)   | 9425(6)  | 3767(5) | 37(2) |
| C44 | 6553(9)   | 9083(6)  | 3550(5) | 39(2) |
| C45 | 5656(8)   | 8697(6)  | 3985(5) | 36(2) |

|      |          |          |          |       |
|------|----------|----------|----------|-------|
| C46  | 5736(6)  | 8651(5)  | 4612(4)  | 26(1) |
| O5   | 1132(6)  | 4989(4)  | 8938(3)  | 32(1) |
| O6   | 3923(5)  | 3980(4)  | 8520(4)  | 40(1) |
| N3   | 2512(7)  | 4353(5)  | 5097(5)  | 30(2) |
| C58  | 914(11)  | 3448(6)  | 6664(12) | 32(2) |
| C59  | -31(10)  | 3079(6)  | 6432(6)  | 33(2) |
| C60  | -104(9)  | 3143(5)  | 5792(6)  | 32(2) |
| C61  | 818(9)   | 3598(5)  | 5356(6)  | 27(2) |
| C62  | 1721(9)  | 3946(5)  | 5602(6)  | 28(2) |
| C63  | 1828(11) | 3893(6)  | 6259(7)  | 32(2) |
| C64  | 1013(11) | 3776(5)  | 4684(7)  | 30(2) |
| C65  | 482(10)  | 3621(6)  | 4170(8)  | 31(2) |
| C66  | 930(13)  | 3898(7)  | 3559(7)  | 32(2) |
| C67  | 1985(12) | 4368(7)  | 3406(7)  | 31(2) |
| C68  | 2566(12) | 4544(6)  | 3922(7)  | 31(2) |
| C69  | 2108(11) | 4261(6)  | 4544(6)  | 31(2) |
| N1E  | 26(14)   | 3312(8)  | 5079(10) | 31(2) |
| C12E | 1060(20) | 3478(9)  | 6610(20) | 32(2) |
| C13E | 2127(17) | 3934(9)  | 6371(13) | 29(3) |
| C14E | 2395(18) | 4141(10) | 5738(11) | 30(3) |
| C15E | 1681(19) | 3932(9)  | 5279(14) | 28(2) |
| C16E | 610(20)  | 3471(11) | 5541(14) | 29(2) |
| C17E | 280(20)  | 3227(12) | 6239(14) | 32(3) |
| C18E | 1700(20) | 4046(11) | 4606(13) | 30(2) |
| C19E | 2500(20) | 4436(13) | 4134(15) | 28(3) |
| C20E | 2280(20) | 4446(14) | 3505(16) | 29(3) |
| C21E | 1200(20) | 4044(13) | 3366(15) | 30(3) |
| C22E | 510(20)  | 3694(12) | 3848(18) | 30(3) |
| C23E | 700(20)  | 3671(10) | 4474(17) | 30(2) |
| C47  | 1870(7)  | 3630(5)  | 8701(4)  | 33(1) |
| C48  | 1685(6)  | 4174(5)  | 9243(4)  | 29(1) |
| C49  | 752(7)   | 3763(6)  | 9770(4)  | 35(2) |
| C50  | -340(7)  | 4020(6)  | 9447(4)  | 36(2) |
| C51  | 146(7)   | 4523(5)  | 8784(4)  | 31(2) |
| C52  | 692(7)   | 3791(5)  | 8410(4)  | 31(1) |

|      |           |           |          |       |
|------|-----------|-----------|----------|-------|
| C53  | 2117(8)   | 2617(6)   | 8915(5)  | 41(2) |
| C54  | 2865(6)   | 4074(5)   | 8239(4)  | 32(1) |
| C55  | -616(7)   | 5230(6)   | 8454(4)  | 37(2) |
| C56  | 714(6)    | 4018(5)   | 7696(4)  | 29(1) |
| C57  | 984(8)    | 3200(5)   | 7358(4)  | 35(2) |
| O7   | -2743(5)  | 11528(4)  | 8856(3)  | 31(1) |
| O8   | -3998(6)  | 9407(4)   | 8605(4)  | 50(2) |
| N4   | -5044(8)  | 13320(5)  | 4988(5)  | 27(2) |
| C81  | -4370(14) | 13384(7)  | 6610(15) | 34(2) |
| C82  | -3305(11) | 13827(6)  | 6453(8)  | 36(2) |
| C83  | -2824(10) | 14097(6)  | 5827(6)  | 30(2) |
| C84  | -3478(11) | 13898(5)  | 5336(7)  | 25(2) |
| C85  | -4556(11) | 13446(6)  | 5525(7)  | 24(2) |
| C86  | -5006(14) | 13189(7)  | 6151(8)  | 32(2) |
| C87  | -3316(12) | 14047(6)  | 4667(7)  | 26(2) |
| C88  | -2454(11) | 14446(6)  | 4220(9)  | 27(2) |
| C89  | -2551(12) | 14488(6)  | 3575(9)  | 33(2) |
| C90  | -3534(12) | 14122(7)  | 3376(7)  | 32(2) |
| C91  | -4397(11) | 13723(6)  | 3817(8)  | 29(2) |
| C92  | -4295(11) | 13685(5)  | 4450(7)  | 26(2) |
| N1B  | -2496(11) | 14291(6)  | 5046(7)  | 26(2) |
| C12B | -2917(15) | 14419(7)  | 3356(10) | 30(3) |
| C13B | -4026(16) | 13995(8)  | 3470(11) | 32(3) |
| C14B | -4518(17) | 13713(8)  | 4080(13) | 29(3) |
| C15B | -3988(19) | 13821(8)  | 4594(10) | 26(2) |
| C16B | -2850(20) | 14257(10) | 4478(12) | 26(2) |
| C17B | -2364(16) | 14536(8)  | 3865(14) | 28(3) |
| C18B | -4228(15) | 13624(7)  | 5253(10) | 26(2) |
| C19B | -5192(15) | 13208(9)  | 5647(9)  | 28(2) |
| C20B | -5150(20) | 13115(11) | 6298(13) | 32(3) |
| C21B | -4200(20) | 13413(12) | 6590(20) | 34(2) |
| C22B | -3243(18) | 13827(10) | 6194(12) | 30(3) |
| C23B | -3366(18) | 13889(8)  | 5552(11) | 26(2) |
| C70  | -4498(7)  | 10981(6)  | 8674(4)  | 34(2) |
| C71  | -3706(6)  | 10998(5)  | 9198(4)  | 33(1) |



|      |           |          |         |       |
|------|-----------|----------|---------|-------|
| C72  | -4135(8)  | 11591(6) | 9686(4) | 41(2) |
| C73  | -3865(8)  | 12560(6) | 9301(4) | 40(2) |
| C74  | -3375(7)  | 12347(5) | 8659(4) | 33(1) |
| C75  | -4358(7)  | 12019(6) | 8328(4) | 36(2) |
| C76  | -5748(9)  | 10712(8) | 8908(7) | 58(3) |
| C77  | -4008(8)  | 10319(6) | 8255(5) | 42(2) |
| C78  | -2551(9)  | 13085(6) | 8284(5) | 48(2) |
| C79  | -4224(9)  | 12180(6) | 7607(5) | 43(2) |
| C80  | -4555(12) | 13147(8) | 7309(5) | 68(3) |
| O9   | 6692(5)   | 8488(4)  | 1278(3) | 34(1) |
| O10  | 5335(6)   | 10634(4) | 1493(4) | 42(1) |
| C93  | 4877(7)   | 9035(5)  | 1431(4) | 32(2) |
| C94  | 5880(7)   | 9013(6)  | 913(4)  | 36(2) |
| C95  | 5620(9)   | 8391(6)  | 445(4)  | 45(2) |
| C96  | 5761(9)   | 7426(6)  | 845(4)  | 43(2) |
| C97  | 5990(7)   | 7656(5)  | 1489(4) | 33(1) |
| C98  | 4865(7)   | 8023(5)  | 1795(4) | 32(1) |
| C99  | 3734(9)   | 9331(7)  | 1191(6) | 50(2) |
| C100 | 5211(7)   | 9726(5)  | 1846(4) | 36(2) |
| C101 | 6675(8)   | 6946(6)  | 1879(5) | 45(2) |
| C102 | 4703(7)   | 7884(5)  | 2513(4) | 33(2) |
| C103 | 4276(10)  | 6911(7)  | 2827(5) | 52(2) |
| N5   | 2468(8)   | 6882(5)  | 5070(5) | 30(2) |
| C104 | 4115(12)  | 6776(6)  | 3551(9) | 29(2) |
| C105 | 5083(12)  | 6278(7)  | 3800(7) | 33(2) |
| C106 | 5104(11)  | 6028(6)  | 4437(6) | 27(2) |
| C107 | 4203(11)  | 6248(5)  | 4844(7) | 26(2) |
| C108 | 3289(11)  | 6727(6)  | 4583(7) | 28(2) |
| C109 | 3211(12)  | 6996(7)  | 3958(7) | 29(2) |
| C110 | 3895(15)  | 6108(7)  | 5541(7) | 29(2) |
| C111 | 4484(13)  | 5673(7)  | 6038(8) | 33(2) |
| C112 | 3929(13)  | 5662(8)  | 6670(9) | 35(2) |
| C113 | 2846(13)  | 6081(7)  | 6754(7) | 32(2) |
| C114 | 2308(13)  | 6495(7)  | 6260(8) | 31(2) |
| C115 | 2832(13)  | 6508(6)  | 5655(7) | 29(2) |

|      |          |          |          |       |
|------|----------|----------|----------|-------|
| N1A  | 5062(13) | 5832(7)  | 5114(8)  | 30(2) |
| C12A | 4203(18) | 6680(8)  | 3484(15) | 29(2) |
| C13A | 3107(17) | 7013(8)  | 3769(11) | 28(3) |
| C14A | 2711(17) | 6961(9)  | 4414(10) | 30(3) |
| C15A | 3450(18) | 6546(9)  | 4828(12) | 28(2) |
| C16A | 4550(20) | 6201(9)  | 4578(12) | 27(2) |
| C17A | 4870(20) | 6272(11) | 3953(12) | 28(3) |
| C18A | 3360(30) | 6365(11) | 5503(11) | 30(2) |
| C19A | 2500(20) | 6542(10) | 5993(15) | 31(3) |
| C20A | 2700(20) | 6288(12) | 6552(14) | 36(3) |
| C21A | 3680(20) | 5846(12) | 6748(14) | 36(3) |
| C22A | 4590(20) | 5646(11) | 6280(12) | 33(3) |
| C23A | 4390(20) | 5925(10) | 5645(12) | 30(2) |
| O11  | 646(5)   | 5074(4)  | 1126(3)  | 28(1) |
| O12  | 3281(5)  | 6020(4)  | 1581(3)  | 38(1) |
| N6   | 59(7)    | 5838(6)  | 5038(4)  | 40(2) |
| C116 | 1312(6)  | 6413(5)  | 1375(4)  | 30(1) |
| C117 | 1343(7)  | 5869(5)  | 823(4)   | 30(1) |
| C118 | 607(7)   | 6302(6)  | 303(4)   | 35(2) |
| C119 | -626(7)  | 6052(6)  | 613(4)   | 33(1) |
| C120 | -386(7)  | 5569(5)  | 1281(4)  | 30(1) |
| C121 | 12(6)    | 6287(5)  | 1652(4)  | 26(1) |
| C122 | 1668(8)  | 7428(6)  | 1160(5)  | 44(2) |
| C123 | 2121(6)  | 5935(5)  | 1845(4)  | 30(1) |
| C124 | -1280(7) | 4860(5)  | 1611(4)  | 33(2) |
| C125 | -269(6)  | 6077(5)  | 2371(4)  | 27(1) |
| C126 | -58(7)   | 6890(5)  | 2693(4)  | 35(2) |
| C127 | -507(7)  | 6743(5)  | 3377(4)  | 30(1) |
| C128 | -1597(8) | 7084(6)  | 3555(5)  | 38(2) |
| C129 | -2042(8) | 7001(6)  | 4163(5)  | 36(2) |
| C130 | -1483(7) | 6585(5)  | 4644(5)  | 34(2) |
| C131 | -375(8)  | 6212(5)  | 4496(5)  | 36(2) |
| C132 | 111(8)   | 6288(5)  | 3858(4)  | 34(2) |
| C133 | -1682(8) | 6396(6)  | 5330(5)  | 38(2) |
| C134 | -2581(9) | 6583(6)  | 5783(6)  | 46(2) |

|      |           |          |          |       |
|------|-----------|----------|----------|-------|
| C135 | -2479(10) | 6320(7)  | 6408(5)  | 52(2) |
| C136 | -1504(10) | 5851(8)  | 6615(5)  | 53(2) |
| C137 | -597(9)   | 5660(7)  | 6178(5)  | 46(2) |
| C138 | -712(9)   | 5954(6)  | 5555(5)  | 42(2) |
| O13  | 3832(5)   | 4395(4)  | 1124(3)  | 29(1) |
| O14  | 1027(5)   | 3239(4)  | 1558(4)  | 42(1) |
| N7   | 2458(7)   | 1851(4)  | 5026(5)  | 34(2) |
| C150 | 4027(10)  | 1727(5)  | 3448(10) | 30(1) |
| C151 | 4994(9)   | 1251(5)  | 3702(6)  | 32(2) |
| C152 | 5069(9)   | 1018(5)  | 4337(6)  | 31(2) |
| C153 | 4199(9)   | 1234(4)  | 4757(6)  | 29(2) |
| C154 | 3211(9)   | 1713(5)  | 4517(6)  | 29(2) |
| C155 | 3153(10)  | 1935(5)  | 3898(6)  | 31(2) |
| C156 | 3970(12)  | 1098(5)  | 5457(6)  | 28(2) |
| C157 | 4567(10)  | 690(5)   | 5951(6)  | 30(2) |
| C158 | 4054(11)  | 690(6)   | 6586(6)  | 34(2) |
| C159 | 3002(13)  | 1085(7)  | 6690(7)  | 37(2) |
| C160 | 2413(10)  | 1484(6)  | 6207(8)  | 34(2) |
| C161 | 2903(12)  | 1495(5)  | 5567(7)  | 31(2) |
| N1F  | 5050(20)  | 850(11)  | 4990(13) | 32(3) |
| C12F | 3890(20)  | 1684(10) | 3430(30) | 30(1) |
| C13F | 2970(20)  | 1929(10) | 3751(17) | 28(3) |
| C14F | 2430(30)  | 1956(13) | 4374(16) | 34(3) |
| C15F | 3360(30)  | 1526(13) | 4730(20) | 30(2) |
| C16F | 4440(30)  | 1208(13) | 4472(19) | 30(3) |
| C17F | 4690(30)  | 1293(15) | 3820(20) | 31(3) |
| C18F | 3420(40)  | 1321(15) | 5425(17) | 29(2) |
| C19F | 2590(30)  | 1504(14) | 5860(30) | 30(3) |
| C20F | 2680(30)  | 1302(19) | 6480(20) | 32(3) |
| C21F | 3600(40)  | 929(17)  | 6653(17) | 33(3) |
| C22F | 4610(30)  | 690(15)  | 6190(20) | 31(3) |
| C23F | 4370(30)  | 942(15)  | 5560(20) | 30(3) |
| C139 | 3078(6)   | 2925(5)  | 1394(4)  | 30(1) |
| C140 | 3267(7)   | 3748(5)  | 833(4)   | 31(1) |
| C141 | 4171(7)   | 3562(6)  | 314(4)   | 37(2) |

|      |           |          |          |       |
|------|-----------|----------|----------|-------|
| C142 | 5276(7)   | 3643(6)  | 624(4)   | 35(2) |
| C143 | 4813(7)   | 3834(5)  | 1286(4)  | 30(1) |
| C144 | 4265(6)   | 2935(5)  | 1681(4)  | 28(1) |
| C145 | 2809(7)   | 2028(6)  | 1191(5)  | 42(2) |
| C146 | 2080(7)   | 3177(6)  | 1842(4)  | 36(2) |
| C147 | 5609(7)   | 4367(6)  | 1591(5)  | 38(2) |
| C148 | 4241(7)   | 2814(5)  | 2396(4)  | 32(1) |
| C149 | 3944(8)   | 1822(6)  | 2746(5)  | 40(2) |
| O15  | -2333(5)  | 859(4)   | 1120(3)  | 34(1) |
| O16  | -977(6)   | -1378(4) | 1319(4)  | 54(2) |
| N8   | 44(8)     | 864(7)   | 4930(5)  | 29(2) |
| C173 | -584(15)  | 1618(17) | 3261(11) | 28(2) |
| C174 | -1676(10) | 1996(8)  | 3421(7)  | 30(2) |
| C175 | -2077(11) | 1977(8)  | 4029(7)  | 30(2) |
| C176 | -1505(12) | 1577(9)  | 4536(7)  | 28(2) |
| C177 | -386(12)  | 1199(8)  | 4360(7)  | 27(2) |
| C178 | 20(14)    | 1195(11) | 3758(7)  | 29(2) |
| C179 | -1675(11) | 1426(8)  | 5190(7)  | 26(2) |
| C180 | -2620(11) | 1615(8)  | 5624(6)  | 29(2) |
| C181 | -2505(12) | 1377(10) | 6271(7)  | 32(2) |
| C182 | -1562(13) | 953(10)  | 6493(6)  | 34(2) |
| C183 | -618(13)  | 743(9)   | 6085(8)  | 34(2) |
| C184 | -711(12)  | 1005(10) | 5436(7)  | 31(2) |
| N1C  | -2480(16) | 1831(12) | 4839(9)  | 32(2) |
| C12C | -760(30)  | 1660(40) | 3310(20) | 28(2) |
| C13C | 200(30)   | 1260(20) | 3618(14) | 29(3) |
| C14C | 210(20)   | 1059(14) | 4218(11) | 27(3) |
| C15C | -700(20)  | 1295(16) | 4594(13) | 30(2) |
| C16C | -1690(20) | 1746(18) | 4364(14) | 28(2) |
| C17C | -1720(20) | 1902(16) | 3723(16) | 28(3) |
| C18C | -970(30)  | 1163(18) | 5308(13) | 29(2) |
| C19C | -370(20)  | 833(16)  | 5821(15) | 31(3) |
| C20C | -870(20)  | 849(17)  | 6444(13) | 36(3) |
| C21C | -1950(30) | 1224(19) | 6523(13) | 34(3) |
| C22C | -2560(20) | 1545(18) | 6042(16) | 31(3) |

|      |           |          |          |       |
|------|-----------|----------|----------|-------|
| C23C | -2070(30) | 1514(16) | 5392(14) | 29(2) |
| C162 | -536(7)   | 255(6)   | 1225(4)  | 36(2) |
| C163 | -1384(7)  | 529(5)   | 742(4)   | 36(2) |
| C164 | -1024(8)  | 1379(6)  | 249(4)   | 43(2) |
| C165 | -1291(9)  | 2147(6)  | 641(4)   | 46(2) |
| C166 | -1683(8)  | 1590(5)  | 1294(4)  | 39(2) |
| C167 | -642(7)   | 1090(5)  | 1582(4)  | 37(2) |
| C168 | 668(9)    | 118(9)   | 955(7)   | 61(3) |
| C169 | -950(8)   | -639(6)  | 1667(5)  | 48(2) |
| C170 | -2506(10) | 2114(7)  | 1703(5)  | 55(2) |
| C171 | -723(8)   | 888(6)   | 2305(4)  | 41(2) |
| C172 | -260(10)  | 1656(7)  | 2589(5)  | 57(2) |

---

**Table S9.** Bond lengths [ $\text{\AA}$ ] and angles [ $^\circ$ ] for **5**.

---

|          |           |           |           |
|----------|-----------|-----------|-----------|
| O1-C2    | 1.435(9)  | C12D-C13D | 1.36(3)   |
| O1-C5    | 1.475(11) | C12D-C17D | 1.44(6)   |
| O2-C8    | 1.439(9)  | C12D-C11  | 1.48(7)   |
| O2-H2O   | 0.84      | C13D-C14D | 1.41(3)   |
| N1-C16   | 1.379(18) | C13D-H13D | 0.95      |
| N1-C23   | 1.399(17) | C14D-C15D | 1.39(3)   |
| N1-H1    | 0.88      | C14D-H14D | 0.95      |
| C12-C13  | 1.36(3)   | C15D-C16D | 1.43(4)   |
| C12-C17  | 1.47(3)   | C15D-C18D | 1.45(4)   |
| C12-C11  | 1.47(4)   | C16D-C17D | 1.35(4)   |
| C13-C14  | 1.422(19) | C17D-H17D | 0.95      |
| C13-H13  | 0.95      | C18D-C19D | 1.36(3)   |
| C14-C15  | 1.415(17) | C18D-C23D | 1.48(3)   |
| C14-H14  | 0.95      | C19D-C20D | 1.40(3)   |
| C15-C16  | 1.391(17) | C19D-H19D | 0.95      |
| C15-C18  | 1.41(2)   | C20D-C21D | 1.40(4)   |
| C16-C17  | 1.45(2)   | C20D-H20D | 0.95      |
| C17-H17  | 0.95      | C21D-C22D | 1.34(4)   |
| C18-C19  | 1.371(19) | C21D-H21D | 0.95      |
| C18-C23  | 1.49(2)   | C22D-C23D | 1.39(4)   |
| C19-C20  | 1.362(19) | C22D-H22D | 0.95      |
| C19-H19  | 0.95      | C1-C7     | 1.515(12) |
| C20-C21  | 1.408(19) | C1-C2     | 1.527(11) |
| C20-H20  | 0.95      | C1-C8     | 1.537(11) |
| C21-C22  | 1.40(2)   | C1-C6     | 1.596(11) |
| C21-H21  | 0.95      | C2-C3     | 1.526(12) |
| C22-C23  | 1.32(2)   | C2-H2     | 1.00      |
| C22-H22  | 0.95      | C3-C4     | 1.532(12) |
| N1D-C16D | 1.37(3)   | C3-H3A    | 0.99      |
| N1D-C23D | 1.45(3)   | C3-H3B    | 0.99      |
| N1D-H1D  | 0.88      | C4-C5     | 1.537(12) |

|          |           |          |           |
|----------|-----------|----------|-----------|
| C4-H4A   | 0.99      | C27-C28  | 1.547(11) |
| C4-H4B   | 0.99      | C27-H27A | 0.99      |
| C5-C9    | 1.518(12) | C27-H27B | 0.99      |
| C5-C6    | 1.552(12) | C28-C32  | 1.505(11) |
| C6-C10   | 1.532(13) | C28-C29  | 1.551(10) |
| C6-H6    | 1.00      | C29-C33  | 1.527(10) |
| C7-H7A   | 0.98      | C29-H29  | 1.00      |
| C7-H7B   | 0.98      | C30-H30A | 0.98      |
| C7-H7C   | 0.98      | C30-H30B | 0.98      |
| C8-H8A   | 0.99      | C30-H30C | 0.98      |
| C8-H8B   | 0.99      | C31-H31A | 0.99      |
| C9-H9A   | 0.98      | C31-H31B | 0.99      |
| C9-H9B   | 0.98      | C32-H32A | 0.98      |
| C9-H9C   | 0.98      | C32-H32B | 0.98      |
| C10-C11  | 1.545(14) | C32-H32C | 0.98      |
| C10-H10F | 0.99      | C33-C34  | 1.539(10) |
| C10-H10G | 0.99      | C33-H33A | 0.99      |
| C11-H11E | 0.99      | C33-H33B | 0.99      |
| C11-H11F | 0.99      | C34-C35  | 1.507(11) |
| O3-C25   | 1.441(9)  | C34-H34A | 0.99      |
| O3-C28   | 1.476(8)  | C34-H34B | 0.99      |
| O4-C31   | 1.441(8)  | C35-C40  | 1.381(11) |
| O4-H4O   | 0.84      | C35-C36  | 1.408(11) |
| N2-C39   | 1.393(10) | C36-C37  | 1.370(11) |
| N2-C46   | 1.395(10) | C36-H36  | 0.95      |
| N2-H2N   | 0.88      | C37-C38  | 1.407(10) |
| C24-C30  | 1.519(10) | C37-H37  | 0.95      |
| C24-C31  | 1.531(9)  | C38-C39  | 1.397(9)  |
| C24-C25  | 1.542(10) | C38-C41  | 1.446(11) |
| C24-C29  | 1.567(9)  | C39-C40  | 1.410(12) |
| C25-C26  | 1.534(10) | C40-H40  | 0.95      |
| C25-H25  | 1.00      | C41-C42  | 1.408(11) |
| C26-C27  | 1.535(11) | C41-C46  | 1.428(10) |
| C26-H26A | 0.99      | C42-C43  | 1.351(12) |
| C26-H26B | 0.99      | C42-H42  | 0.95      |

|          |           |           |           |
|----------|-----------|-----------|-----------|
| C43-C44  | 1.410(12) | N1E-C23E  | 1.46(4)   |
| C43-H43  | 0.95      | N1E-H1EN  | 0.88      |
| C44-C45  | 1.389(13) | C12E-C17E | 1.38(5)   |
| C44-H44  | 0.95      | C12E-C13E | 1.43(3)   |
| C45-C46  | 1.352(12) | C12E-C57  | 1.58(5)   |
| C45-H45  | 0.95      | C13E-C14E | 1.35(4)   |
| O5-C51   | 1.450(9)  | C13E-H13E | 0.95      |
| O5-C48   | 1.459(9)  | C14E-C15E | 1.43(3)   |
| O6-C54   | 1.436(9)  | C14E-H14E | 0.95      |
| O6-H6O   | 0.84      | C15E-C18E | 1.43(4)   |
| N3-C69   | 1.355(15) | C15E-C16E | 1.45(4)   |
| N3-C62   | 1.405(14) | C16E-C17E | 1.49(4)   |
| N3-H3N   | 0.88      | C17E-H17E | 0.95      |
| C58-C63  | 1.40(2)   | C18E-C19E | 1.36(4)   |
| C58-C59  | 1.42(2)   | C18E-C23E | 1.39(4)   |
| C58-C57  | 1.48(3)   | C19E-C20E | 1.40(4)   |
| C59-C60  | 1.375(18) | C19E-H19E | 0.95      |
| C59-H59  | 0.95      | C20E-C21E | 1.48(4)   |
| C60-C61  | 1.444(16) | C20E-H20E | 0.95      |
| C60-H60  | 0.95      | C21E-C22E | 1.29(4)   |
| C61-C62  | 1.376(17) | C21E-H21E | 0.95      |
| C61-C64  | 1.417(18) | C22E-C23E | 1.38(4)   |
| C62-C63  | 1.419(19) | C22E-H22E | 0.95      |
| C63-H63  | 0.95      | C47-C54   | 1.526(9)  |
| C64-C65  | 1.378(17) | C47-C48   | 1.528(10) |
| C64-C69  | 1.457(18) | C47-C53   | 1.533(11) |
| C65-C66  | 1.36(2)   | C47-C52   | 1.582(10) |
| C65-H65  | 0.95      | C48-C49   | 1.538(9)  |
| C66-C67  | 1.41(2)   | C48-H48   | 1.00      |
| C66-H66  | 0.95      | C49-C50   | 1.541(11) |
| C67-C68  | 1.423(17) | C49-H49A  | 0.99      |
| C67-H67  | 0.95      | C49-H49B  | 0.99      |
| C68-C69  | 1.382(18) | C50-C51   | 1.541(11) |
| C68-H68  | 0.95      | C50-H50A  | 0.99      |
| N1E-C16E | 1.32(3)   | C50-H50B  | 0.99      |



|          |           |           |           |
|----------|-----------|-----------|-----------|
| C51-C55  | 1.511(11) | C87-C88   | 1.381(18) |
| C51-C52  | 1.564(10) | C87-C92   | 1.428(19) |
| C52-C56  | 1.510(11) | C88-C89   | 1.39(2)   |
| C52-H52  | 1.00      | C88-H88   | 0.95      |
| C53-H53A | 0.98      | C89-C90   | 1.42(2)   |
| C53-H53B | 0.98      | C89-H89   | 0.95      |
| C53-H53C | 0.98      | C90-C91   | 1.375(19) |
| C54-H54A | 0.99      | C90-H90   | 0.95      |
| C54-H54B | 0.99      | C91-C92   | 1.37(2)   |
| C55-H55A | 0.98      | C91-H91   | 0.95      |
| C55-H55B | 0.98      | N1B-C16B  | 1.34(2)   |
| C55-H55C | 0.98      | N1B-C23B  | 1.46(3)   |
| C56-C57  | 1.540(10) | N1B-H1BN  | 0.88      |
| C56-H56A | 0.99      | C12B-C17B | 1.37(3)   |
| C56-H56B | 0.99      | C12B-C13B | 1.43(2)   |
| C57-H57A | 0.99      | C12B-H12B | 0.95      |
| C57-H57B | 0.99      | C13B-C14B | 1.37(3)   |
| O7-C71   | 1.441(8)  | C13B-H13B | 0.95      |
| O7-C74   | 1.449(9)  | C14B-C15B | 1.36(3)   |
| O8-C77   | 1.432(11) | C14B-H14B | 0.95      |
| O8-H8O   | 0.84      | C15B-C18B | 1.40(3)   |
| N4-C85   | 1.384(16) | C15B-C16B | 1.47(3)   |
| N4-C92   | 1.407(16) | C16B-C17B | 1.37(3)   |
| N4-H4N   | 0.88      | C17B-H17B | 0.95      |
| C81-C86  | 1.37(3)   | C18B-C23B | 1.35(3)   |
| C81-C82  | 1.40(2)   | C18B-C19B | 1.42(3)   |
| C81-C80  | 1.48(3)   | C19B-C20B | 1.39(3)   |
| C82-C83  | 1.39(2)   | C19B-H19B | 0.95      |
| C82-H82  | 0.95      | C20B-C21B | 1.45(5)   |
| C83-C84  | 1.441(18) | C20B-H20B | 0.95      |
| C83-H83  | 0.95      | C21B-C22B | 1.41(4)   |
| C84-C87  | 1.410(19) | C21B-C80  | 1.53(5)   |
| C84-C85  | 1.425(19) | C22B-C23B | 1.39(3)   |
| C85-C86  | 1.38(2)   | C22B-H22B | 0.95      |
| C86-H86  | 0.95      | C70-C77   | 1.522(11) |

|          |           |           |           |
|----------|-----------|-----------|-----------|
| C70-C76  | 1.535(12) | C93-C98   | 1.569(10) |
| C70-C71  | 1.540(10) | C94-C95   | 1.536(11) |
| C70-C75  | 1.591(11) | C94-H94   | 1.00      |
| C71-C72  | 1.532(11) | C95-C96   | 1.556(12) |
| C71-H71  | 1.00      | C95-H95A  | 0.99      |
| C72-C73  | 1.546(12) | C95-H95B  | 0.99      |
| C72-H72A | 0.99      | C96-C97   | 1.534(11) |
| C72-H72B | 0.99      | C96-H96A  | 0.99      |
| C73-C74  | 1.527(10) | C96-H96B  | 0.99      |
| C73-H73A | 0.99      | C97-C101  | 1.515(11) |
| C73-H73B | 0.99      | C97-C98   | 1.559(11) |
| C74-C78  | 1.525(11) | C98-C102  | 1.513(11) |
| C74-C75  | 1.543(10) | C98-H98   | 1.00      |
| C75-C79  | 1.519(11) | C99-H99A  | 0.98      |
| C75-H75  | 1.00      | C99-H99B  | 0.98      |
| C76-H76A | 0.98      | C99-H99C  | 0.98      |
| C76-H76B | 0.98      | C100-H10A | 0.99      |
| C76-H76C | 0.98      | C100-H10B | 0.99      |
| C77-H77A | 0.99      | C101-H10C | 0.98      |
| C77-H77B | 0.99      | C101-H10D | 0.98      |
| C78-H78A | 0.98      | C101-H10E | 0.98      |
| C78-H78B | 0.98      | C102-C103 | 1.547(11) |
| C78-H78C | 0.98      | C102-H10H | 0.99      |
| C79-C80  | 1.536(13) | C102-H10I | 0.99      |
| C79-H79A | 0.99      | C103-C12A | 1.39(3)   |
| C79-H79B | 0.99      | C103-C104 | 1.53(2)   |
| C80-H80A | 0.99      | C103-H10J | 0.99      |
| C80-H80B | 0.99      | C103-H10K | 0.99      |
| O9-C94   | 1.442(10) | N5-C108   | 1.398(16) |
| O9-C97   | 1.466(8)  | N5-C115   | 1.394(17) |
| O10-C100 | 1.429(10) | N5-H5N    | 0.88      |
| O10-H100 | 0.84      | C104-C109 | 1.38(2)   |
| C93-C99  | 1.528(13) | C104-C105 | 1.46(2)   |
| C93-C94  | 1.541(11) | C105-C106 | 1.36(2)   |
| C93-C100 | 1.551(10) | C105-H105 | 0.95      |

|           |           |           |           |
|-----------|-----------|-----------|-----------|
| C106-C107 | 1.381(17) | C21A-C22A | 1.45(3)   |
| C106-H106 | 0.95      | C21A-H21A | 0.95      |
| C107-C108 | 1.40(2)   | C22A-C23A | 1.40(3)   |
| C107-C110 | 1.48(2)   | C22A-H22A | 0.95      |
| C108-C109 | 1.35(2)   | O11-C117  | 1.455(9)  |
| C109-H109 | 0.95      | O11-C120  | 1.460(10) |
| C110-C111 | 1.40(2)   | O12-C123  | 1.421(8)  |
| C110-C115 | 1.40(2)   | O12-H12O  | 0.84      |
| C111-C112 | 1.44(2)   | N6-C131   | 1.352(12) |
| C111-H111 | 0.95      | N6-C138   | 1.397(12) |
| C112-C113 | 1.43(2)   | N6-H6N    | 0.88      |
| C112-H112 | 0.95      | C116-C123 | 1.543(10) |
| C113-C114 | 1.349(19) | C116-C122 | 1.545(10) |
| C113-H113 | 0.95      | C116-C117 | 1.546(10) |
| C114-C115 | 1.38(2)   | C116-C121 | 1.582(9)  |
| C114-H114 | 0.95      | C117-C118 | 1.538(10) |
| N1A-C23A  | 1.35(3)   | C117-H117 | 1.00      |
| N1A-C16A  | 1.38(3)   | C118-C119 | 1.551(10) |
| N1A-H1AN  | 0.88      | C118-H11A | 0.99      |
| C12A-C17A | 1.40(4)   | C118-H11B | 0.99      |
| C12A-C13A | 1.49(3)   | C119-C120 | 1.543(11) |
| C13A-C14A | 1.41(3)   | C119-H11C | 0.99      |
| C13A-H13A | 0.95      | C119-H11D | 0.99      |
| C14A-C15A | 1.38(3)   | C120-C124 | 1.519(9)  |
| C14A-H14A | 0.95      | C120-C121 | 1.541(9)  |
| C15A-C18A | 1.42(3)   | C121-C125 | 1.525(10) |
| C15A-C16A | 1.47(3)   | C121-H121 | 1.00      |
| C16A-C17A | 1.35(4)   | C122-H12Q | 0.98      |
| C17A-H17A | 0.95      | C122-H12R | 0.98      |
| C18A-C23A | 1.41(3)   | C122-H12S | 0.98      |
| C18A-C19A | 1.44(4)   | C123-H12D | 0.99      |
| C19A-C20A | 1.24(4)   | C123-H12E | 0.99      |
| C19A-H19A | 0.95      | C124-H12F | 0.98      |
| C20A-C21A | 1.40(4)   | C124-H12G | 0.98      |
| C20A-H20A | 0.95      | C124-H12H | 0.98      |

|           |           |           |           |
|-----------|-----------|-----------|-----------|
| C125-C126 | 1.529(9)  | C150-C149 | 1.51(2)   |
| C125-H12I | 0.99      | C151-C152 | 1.360(17) |
| C125-H12J | 0.99      | C151-H151 | 0.95      |
| C126-C127 | 1.488(11) | C152-C153 | 1.370(16) |
| C126-H12K | 0.99      | C152-H152 | 0.95      |
| C126-H12L | 0.99      | C153-C154 | 1.457(15) |
| C127-C132 | 1.402(11) | C153-C156 | 1.478(17) |
| C127-C128 | 1.420(12) | C154-C155 | 1.324(17) |
| C128-C129 | 1.343(13) | C155-H155 | 0.95      |
| C128-H128 | 0.95      | C156-C157 | 1.386(16) |
| C129-C130 | 1.343(13) | C156-C161 | 1.403(17) |
| C129-H129 | 0.95      | C157-C158 | 1.435(17) |
| C130-C131 | 1.443(13) | C157-H157 | 0.95      |
| C130-C133 | 1.448(13) | C158-C159 | 1.385(18) |
| C131-C132 | 1.417(13) | C158-H158 | 0.95      |
| C132-H132 | 0.95      | C159-C160 | 1.357(17) |
| C133-C138 | 1.404(14) | C159-H159 | 0.95      |
| C133-C134 | 1.423(14) | C160-C161 | 1.434(18) |
| C134-C135 | 1.350(15) | C160-H160 | 0.95      |
| C134-H134 | 0.95      | N1F-C16F  | 1.41(4)   |
| C135-C136 | 1.414(17) | N1F-C23F  | 1.43(5)   |
| C135-H135 | 0.95      | N1F-H1FN  | 0.88      |
| C136-C137 | 1.411(16) | C12F-C13F | 1.31(5)   |
| C136-H136 | 0.95      | C12F-C17F | 1.38(6)   |
| C137-C138 | 1.356(15) | C12F-C149 | 1.44(6)   |
| C137-H137 | 0.95      | C13F-C14F | 1.43(5)   |
| O13-C140  | 1.436(8)  | C13F-H13F | 0.95      |
| O13-C143  | 1.460(10) | C14F-C15F | 1.49(5)   |
| O14-C146  | 1.434(9)  | C14F-H14F | 0.95      |
| O14-H14O  | 0.84      | C15F-C16F | 1.45(6)   |
| N7-C161   | 1.349(14) | C15F-C18F | 1.47(5)   |
| N7-C154   | 1.379(14) | C16F-C17F | 1.39(6)   |
| N7-H7N    | 0.88      | C17F-H17F | 0.95      |
| C150-C155 | 1.41(2)   | C18F-C23F | 1.29(5)   |
| C150-C151 | 1.445(17) | C18F-C19F | 1.34(6)   |

|           |           |           |           |
|-----------|-----------|-----------|-----------|
| C19F-C20F | 1.35(6)   | C149-H201 | 0.99      |
| C19F-H19F | 0.95      | C149-H202 | 0.99      |
| C20F-C21F | 1.27(6)   | O15-C163  | 1.450(10) |
| C20F-H20F | 0.95      | O15-C166  | 1.454(9)  |
| C21F-C22F | 1.56(6)   | O16-C169  | 1.434(12) |
| C21F-H21F | 0.95      | O16-H16O  | 0.84      |
| C22F-C23F | 1.38(5)   | N8-C184   | 1.377(18) |
| C22F-H22F | 0.95      | N8-C177   | 1.387(16) |
| C139-C145 | 1.518(10) | N8-H8N    | 0.88      |
| C139-C146 | 1.529(11) | C173-C178 | 1.40(3)   |
| C139-C140 | 1.560(10) | C173-C174 | 1.44(2)   |
| C139-C144 | 1.586(9)  | C173-C172 | 1.45(2)   |
| C140-C141 | 1.521(11) | C174-C175 | 1.338(17) |
| C140-H140 | 1.00      | C174-H174 | 0.95      |
| C141-C142 | 1.537(10) | C175-C176 | 1.385(17) |
| C141-H14T | 0.99      | C175-H175 | 0.95      |
| C141-H14X | 0.99      | C176-C179 | 1.378(19) |
| C142-C143 | 1.545(11) | C176-C177 | 1.47(2)   |
| C142-H14Y | 0.99      | C177-C178 | 1.33(2)   |
| C142-H14Z | 0.99      | C178-H178 | 0.95      |
| C143-C147 | 1.500(9)  | C179-C184 | 1.402(18) |
| C143-C144 | 1.554(9)  | C179-C180 | 1.436(16) |
| C144-C148 | 1.515(11) | C180-C181 | 1.395(18) |
| C144-H144 | 1.00      | C180-H180 | 0.95      |
| C145-H14Q | 0.98      | C181-C182 | 1.36(2)   |
| C145-H14R | 0.98      | C181-H181 | 0.95      |
| C145-H14S | 0.98      | C182-C183 | 1.41(2)   |
| C146-H14H | 0.99      | C182-H182 | 0.95      |
| C146-H14I | 0.99      | C183-C184 | 1.40(2)   |
| C147-H14J | 0.98      | C183-H183 | 0.95      |
| C147-H14K | 0.98      | N1C-C16C  | 1.33(3)   |
| C147-H14L | 0.98      | N1C-C23C  | 1.34(3)   |
| C148-C149 | 1.557(10) | N1C-H1CN  | 0.88      |
| C148-H14M | 0.99      | C12C-C13C | 1.45(6)   |
| C148-H14N | 0.99      | C12C-C17C | 1.45(5)   |

|             |           |             |           |
|-------------|-----------|-------------|-----------|
| C12C-C172   | 1.60(5)   | C163-H163   | 1.00      |
| C13C-C14C   | 1.27(4)   | C164-C165   | 1.548(12) |
| C13C-H13C   | 0.95      | C164-H16A   | 0.99      |
| C14C-C15C   | 1.36(3)   | C164-H16B   | 0.99      |
| C14C-H203   | 0.95      | C165-C166   | 1.527(11) |
| C15C-C16C   | 1.43(4)   | C165-H16C   | 0.99      |
| C15C-C18C   | 1.51(4)   | C165-H16D   | 0.99      |
| C16C-C17C   | 1.36(4)   | C166-C170   | 1.542(14) |
| C17C-H17C   | 0.95      | C166-C167   | 1.559(12) |
| C18C-C19C   | 1.38(4)   | C167-C171   | 1.524(11) |
| C18C-C23C   | 1.41(4)   | C167-H167   | 1.00      |
| C19C-C20C   | 1.41(4)   | C168-H16E   | 0.98      |
| C19C-H19C   | 0.95      | C168-H16F   | 0.98      |
| C20C-C21C   | 1.40(4)   | C168-H16G   | 0.98      |
| C20C-H20C   | 0.95      | C169-H16H   | 0.99      |
| C21C-C22C   | 1.34(4)   | C169-H16I   | 0.99      |
| C21C-H21C   | 0.95      | C170-H17X   | 0.98      |
| C22C-C23C   | 1.46(4)   | C170-H17Y   | 0.98      |
| C22C-H22C   | 0.95      | C170-H17Z   | 0.98      |
| C162-C168   | 1.504(14) | C171-C172   | 1.514(11) |
| C162-C163   | 1.519(11) | C171-H17G   | 0.99      |
| C162-C169   | 1.540(11) | C171-H17H   | 0.99      |
| C162-C167   | 1.569(11) | C172-H17I   | 0.99      |
| C163-C164   | 1.530(11) | C172-H17J   | 0.99      |
| C2-O1-C5    | 95.8(6)   | C14-C13-H13 | 116.9     |
| C8-O2-H2O   | 109.5     | C15-C14-C13 | 115.8(12) |
| C16-N1-C23  | 109.0(12) | C15-C14-H14 | 122.1     |
| C16-N1-H1   | 125.5     | C13-C14-H14 | 122.1     |
| C23-N1-H1   | 125.5     | C16-C15-C18 | 108.4(12) |
| C13-C12-C17 | 118(3)    | C16-C15-C14 | 121.1(13) |
| C13-C12-C11 | 116.3(17) | C18-C15-C14 | 130.5(11) |
| C17-C12-C11 | 125(2)    | N1-C16-C15  | 110.2(12) |
| C12-C13-C14 | 126.1(19) | N1-C16-C17  | 127.1(12) |
| C12-C13-H13 | 116.9     | C15-C16-C17 | 122.7(13) |

|                |           |                |          |
|----------------|-----------|----------------|----------|
| C16-C17-C12    | 115.8(17) | C16D-C15D-C18D | 109(2)   |
| C16-C17-H17    | 122.1     | C17D-C16D-N1D  | 126(2)   |
| C12-C17-H17    | 122.1     | C17D-C16D-C15D | 125(2)   |
| C19-C18-C15    | 140.5(13) | N1D-C16D-C15D  | 109(2)   |
| C19-C18-C23    | 113.6(12) | C16D-C17D-C12D | 112(3)   |
| C15-C18-C23    | 105.8(12) | C16D-C17D-H17D | 124.0    |
| C20-C19-C18    | 124.4(12) | C12D-C17D-H17D | 124.0    |
| C20-C19-H19    | 117.8     | C19D-C18D-C15D | 136(2)   |
| C18-C19-H19    | 117.8     | C19D-C18D-C23D | 118(2)   |
| C19-C20-C21    | 119.7(12) | C15D-C18D-C23D | 106(2)   |
| C19-C20-H20    | 120.2     | C18D-C19D-C20D | 120(2)   |
| C21-C20-H20    | 120.2     | C18D-C19D-H19D | 120.0    |
| C22-C21-C20    | 118.9(13) | C20D-C19D-H19D | 120.0    |
| C22-C21-H21    | 120.6     | C19D-C20D-C21D | 120(2)   |
| C20-C21-H21    | 120.6     | C19D-C20D-H20D | 120.0    |
| C23-C22-C21    | 120.4(13) | C21D-C20D-H20D | 120.0    |
| C23-C22-H22    | 119.8     | C22D-C21D-C20D | 123(2)   |
| C21-C22-H22    | 119.8     | C22D-C21D-H21D | 118.6    |
| C22-C23-N1     | 130.5(16) | C20D-C21D-H21D | 118.5    |
| C22-C23-C18    | 123.0(13) | C21D-C22D-C23D | 118(2)   |
| N1-C23-C18     | 106.6(14) | C21D-C22D-H22D | 121.1    |
| C16D-N1D-C23D  | 110.3(18) | C23D-C22D-H22D | 121.1    |
| C16D-N1D-H1D   | 124.8     | C22D-C23D-N1D  | 132(2)   |
| C23D-N1D-H1D   | 124.8     | C22D-C23D-C18D | 122(2)   |
| C13D-C12D-C17D | 130(5)    | N1D-C23D-C18D  | 106(2)   |
| C13D-C12D-C11  | 93(3)     | C7-C1-C2       | 115.9(8) |
| C17D-C12D-C11  | 136(3)    | C7-C1-C8       | 109.1(7) |
| C12D-C13D-C14D | 111(3)    | C2-C1-C8       | 108.1(6) |
| C12D-C13D-H13D | 124.5     | C7-C1-C6       | 111.2(7) |
| C14D-C13D-H13D | 124.6     | C2-C1-C6       | 99.9(6)  |
| C15D-C14D-C13D | 126(2)    | C8-C1-C6       | 112.5(6) |
| C15D-C14D-H14D | 117.0     | O1-C2-C3       | 101.4(6) |
| C13D-C14D-H14D | 117.0     | O1-C2-C1       | 102.4(7) |
| C14D-C15D-C16D | 116(2)    | C3-C2-C1       | 114.0(7) |
| C14D-C15D-C18D | 136(2)    | O1-C2-H2       | 112.7    |

|            |          |               |           |
|------------|----------|---------------|-----------|
| C3-C2-H2   | 112.7    | O2-C8-H8B     | 109.4     |
| C1-C2-H2   | 112.7    | C1-C8-H8B     | 109.4     |
| C2-C3-C4   | 102.9(7) | H8A-C8-H8B    | 108.0     |
| C2-C3-H3A  | 111.2    | C5-C9-H9A     | 109.5     |
| C4-C3-H3A  | 111.2    | C5-C9-H9B     | 109.5     |
| C2-C3-H3B  | 111.2    | H9A-C9-H9B    | 109.5     |
| C4-C3-H3B  | 111.2    | C5-C9-H9C     | 109.5     |
| H3A-C3-H3B | 109.1    | H9A-C9-H9C    | 109.5     |
| C3-C4-C5   | 100.7(7) | H9B-C9-H9C    | 109.5     |
| C3-C4-H4A  | 111.6    | C6-C10-C11    | 113.3(8)  |
| C5-C4-H4A  | 111.6    | C6-C10-H10F   | 108.9     |
| C3-C4-H4B  | 111.6    | C11-C10-H10F  | 108.9     |
| C5-C4-H4B  | 111.6    | C6-C10-H10G   | 108.9     |
| H4A-C4-H4B | 109.4    | C11-C10-H10G  | 108.9     |
| O1-C5-C9   | 107.9(8) | H10F-C10-H10G | 107.7     |
| O1-C5-C4   | 101.5(7) | C12-C11-C10   | 111.9(9)  |
| C9-C5-C4   | 114.4(7) | C12D-C11-C10  | 116.6(10) |
| O1-C5-C6   | 103.8(6) | C12-C11-H11E  | 109.2     |
| C9-C5-C6   | 119.8(9) | C10-C11-H11E  | 109.2     |
| C4-C5-C6   | 107.3(7) | C12-C11-H11F  | 109.2     |
| C10-C6-C5  | 116.8(7) | C10-C11-H11F  | 109.2     |
| C10-C6-C1  | 115.5(7) | H11E-C11-H11F | 107.9     |
| C5-C6-C1   | 100.7(6) | C25-O3-C28    | 96.3(5)   |
| C10-C6-H6  | 107.8    | C31-O4-H4O    | 109.5     |
| C5-C6-H6   | 107.8    | C39-N2-C46    | 108.1(6)  |
| C1-C6-H6   | 107.8    | C39-N2-H2N    | 125.9     |
| C1-C7-H7A  | 109.5    | C46-N2-H2N    | 125.9     |
| C1-C7-H7B  | 109.5    | C30-C24-C31   | 109.2(6)  |
| H7A-C7-H7B | 109.5    | C30-C24-C25   | 114.0(6)  |
| C1-C7-H7C  | 109.5    | C31-C24-C25   | 108.2(5)  |
| H7A-C7-H7C | 109.5    | C30-C24-C29   | 113.6(5)  |
| H7B-C7-H7C | 109.5    | C31-C24-C29   | 111.6(6)  |
| O2-C8-C1   | 111.1(7) | C25-C24-C29   | 100.1(5)  |
| O2-C8-H8A  | 109.4    | O3-C25-C26    | 103.0(6)  |
| C1-C8-H8A  | 109.4    | O3-C25-C24    | 101.0(5)  |



|               |          |               |          |
|---------------|----------|---------------|----------|
| C26-C25-C24   | 114.1(5) | O4-C31-H31A   | 109.2    |
| O3-C25-H25    | 112.6    | C24-C31-H31A  | 109.2    |
| C26-C25-H25   | 112.6    | O4-C31-H31B   | 109.2    |
| C24-C25-H25   | 112.6    | C24-C31-H31B  | 109.2    |
| C25-C26-C27   | 101.0(6) | H31A-C31-H31B | 107.9    |
| C25-C26-H26A  | 111.6    | C28-C32-H32A  | 109.5    |
| C27-C26-H26A  | 111.6    | C28-C32-H32B  | 109.5    |
| C25-C26-H26B  | 111.6    | H32A-C32-H32B | 109.5    |
| C27-C26-H26B  | 111.6    | C28-C32-H32C  | 109.5    |
| H26A-C26-H26B | 109.4    | H32A-C32-H32C | 109.5    |
| C26-C27-C28   | 102.8(6) | H32B-C32-H32C | 109.5    |
| C26-C27-H27A  | 111.2    | C29-C33-C34   | 113.3(6) |
| C28-C27-H27A  | 111.2    | C29-C33-H33A  | 108.9    |
| C26-C27-H27B  | 111.2    | C34-C33-H33A  | 108.9    |
| C28-C27-H27B  | 111.2    | C29-C33-H33B  | 108.9    |
| H27A-C27-H27B | 109.1    | C34-C33-H33B  | 108.9    |
| O3-C28-C32    | 107.8(6) | H33A-C33-H33B | 107.7    |
| O3-C28-C27    | 99.9(6)  | C35-C34-C33   | 113.1(6) |
| C32-C28-C27   | 116.0(7) | C35-C34-H34A  | 109.0    |
| O3-C28-C29    | 102.5(5) | C33-C34-H34A  | 109.0    |
| C32-C28-C29   | 119.8(7) | C35-C34-H34B  | 109.0    |
| C27-C28-C29   | 108.1(6) | C33-C34-H34B  | 109.0    |
| C33-C29-C28   | 115.7(6) | H34A-C34-H34B | 107.8    |
| C33-C29-C24   | 118.0(6) | C40-C35-C36   | 119.3(7) |
| C28-C29-C24   | 102.0(5) | C40-C35-C34   | 120.5(7) |
| C33-C29-H29   | 106.8    | C36-C35-C34   | 120.1(7) |
| C28-C29-H29   | 106.8    | C37-C36-C35   | 124.1(7) |
| C24-C29-H29   | 106.8    | C37-C36-H36   | 118.0    |
| C24-C30-H30A  | 109.5    | C35-C36-H36   | 118.0    |
| C24-C30-H30B  | 109.5    | C36-C37-C38   | 116.4(7) |
| H30A-C30-H30B | 109.5    | C36-C37-H37   | 121.8    |
| C24-C30-H30C  | 109.5    | C38-C37-H37   | 121.8    |
| H30A-C30-H30C | 109.5    | C39-C38-C37   | 120.8(7) |
| H30B-C30-H30C | 109.5    | C39-C38-C41   | 107.0(6) |
| O4-C31-C24    | 112.2(6) | C37-C38-C41   | 132.1(6) |

|             |           |                |           |
|-------------|-----------|----------------|-----------|
| N2-C39-C38  | 109.8(7)  | C59-C60-C61    | 118.1(11) |
| N2-C39-C40  | 128.7(7)  | C59-C60-H60    | 120.9     |
| C38-C39-C40 | 121.4(7)  | C61-C60-H60    | 120.9     |
| C35-C40-C39 | 117.9(7)  | C62-C61-C64    | 109.1(11) |
| C35-C40-H40 | 121.0     | C62-C61-C60    | 118.4(11) |
| C39-C40-H40 | 121.0     | C64-C61-C60    | 132.5(12) |
| C42-C41-C46 | 117.4(7)  | C61-C62-N3     | 108.7(11) |
| C42-C41-C38 | 136.2(7)  | C61-C62-C63    | 125.2(11) |
| C46-C41-C38 | 106.4(6)  | N3-C62-C63     | 126.1(11) |
| C43-C42-C41 | 120.3(7)  | C58-C63-C62    | 114.5(14) |
| C43-C42-H42 | 119.8     | C58-C63-H63    | 122.7     |
| C41-C42-H42 | 119.8     | C62-C63-H63    | 122.7     |
| C42-C43-C44 | 121.0(8)  | C65-C64-C61    | 138.7(13) |
| C42-C43-H43 | 119.5     | C65-C64-C69    | 116.6(11) |
| C44-C43-H43 | 119.5     | C61-C64-C69    | 104.8(12) |
| C45-C44-C43 | 119.9(8)  | C66-C65-C64    | 123.2(12) |
| C45-C44-H44 | 120.1     | C66-C65-H65    | 118.4     |
| C43-C44-H44 | 120.1     | C64-C65-H65    | 118.4     |
| C46-C45-C44 | 119.1(8)  | C65-C66-C67    | 121.7(13) |
| C46-C45-H45 | 120.5     | C65-C66-H66    | 119.1     |
| C44-C45-H45 | 120.5     | C67-C66-H66    | 119.1     |
| C45-C46-N2  | 129.0(7)  | C66-C67-C68    | 117.1(14) |
| C45-C46-C41 | 122.2(7)  | C66-C67-H67    | 121.5     |
| N2-C46-C41  | 108.6(7)  | C68-C67-H67    | 121.5     |
| C51-O5-C48  | 96.6(5)   | C69-C68-C67    | 121.1(14) |
| C54-O6-H60  | 109.5     | C69-C68-H68    | 119.5     |
| C69-N3-C62  | 108.5(10) | C67-C68-H68    | 119.5     |
| C69-N3-H3N  | 125.8     | N3-C69-C68     | 130.7(13) |
| C62-N3-H3N  | 125.8     | N3-C69-C64     | 109.0(11) |
| C63-C58-C59 | 122.2(19) | C68-C69-C64    | 120.3(12) |
| C63-C58-C57 | 120.9(14) | C16E-N1E-C23E  | 108(2)    |
| C59-C58-C57 | 116.0(11) | C16E-N1E-H1EN  | 126.1     |
| C60-C59-C58 | 121.5(13) | C23E-N1E-H1EN  | 126.1     |
| C60-C59-H59 | 119.2     | C17E-C12E-C13E | 124(4)    |
| C58-C59-H59 | 119.2     | C17E-C12E-C57  | 125(2)    |

|                |          |               |          |
|----------------|----------|---------------|----------|
| C13E-C12E-C57  | 110(3)   | C54-C47-C53   | 109.3(7) |
| C14E-C13E-C12E | 119(3)   | C48-C47-C53   | 114.3(7) |
| C14E-C13E-H13E | 120.6    | C54-C47-C52   | 111.7(6) |
| C12E-C13E-H13E | 120.6    | C48-C47-C52   | 100.2(6) |
| C13E-C14E-C15E | 124(2)   | C53-C47-C52   | 113.0(6) |
| C13E-C14E-H14E | 117.8    | O5-C48-C47    | 101.6(6) |
| C15E-C14E-H14E | 117.9    | O5-C48-C49    | 101.9(6) |
| C18E-C15E-C14E | 138(2)   | C47-C48-C49   | 113.6(6) |
| C18E-C15E-C16E | 106(2)   | O5-C48-H48    | 112.9    |
| C14E-C15E-C16E | 115(2)   | C47-C48-H48   | 112.9    |
| N1E-C16E-C15E  | 110(2)   | C49-C48-H48   | 112.9    |
| N1E-C16E-C17E  | 127(3)   | C48-C49-C50   | 101.4(6) |
| C15E-C16E-C17E | 122(3)   | C48-C49-H49A  | 111.5    |
| C12E-C17E-C16E | 115(3)   | C50-C49-H49A  | 111.5    |
| C12E-C17E-H17E | 122.7    | C48-C49-H49B  | 111.5    |
| C16E-C17E-H17E | 122.7    | C50-C49-H49B  | 111.5    |
| C19E-C18E-C23E | 121(3)   | H49A-C49-H49B | 109.3    |
| C19E-C18E-C15E | 131(3)   | C51-C50-C49   | 102.2(6) |
| C23E-C18E-C15E | 108(3)   | C51-C50-H50A  | 111.3    |
| C18E-C19E-C20E | 118(3)   | C49-C50-H50A  | 111.3    |
| C18E-C19E-H19E | 121.1    | C51-C50-H50B  | 111.3    |
| C20E-C19E-H19E | 121.2    | C49-C50-H50B  | 111.3    |
| C19E-C20E-C21E | 121(3)   | H50A-C50-H50B | 109.2    |
| C19E-C20E-H20E | 119.7    | O5-C51-C55    | 108.3(6) |
| C21E-C20E-H20E | 119.7    | O5-C51-C50    | 101.1(6) |
| C22E-C21E-C20E | 116(3)   | C55-C51-C50   | 115.9(7) |
| C22E-C21E-H21E | 121.8    | O5-C51-C52    | 103.0(6) |
| C20E-C21E-H21E | 121.8    | C55-C51-C52   | 118.7(7) |
| C21E-C22E-C23E | 125(3)   | C50-C51-C52   | 107.5(6) |
| C21E-C22E-H22E | 117.7    | C56-C52-C51   | 115.7(6) |
| C23E-C22E-H22E | 117.7    | C56-C52-C47   | 118.1(6) |
| C18E-C23E-C22E | 119(3)   | C51-C52-C47   | 101.3(6) |
| C18E-C23E-N1E  | 108(3)   | C56-C52-H52   | 107.0    |
| C22E-C23E-N1E  | 133(3)   | C51-C52-H52   | 107.0    |
| C54-C47-C48    | 108.0(6) | C47-C52-H52   | 107.0    |

|               |           |             |           |
|---------------|-----------|-------------|-----------|
| C47-C53-H53A  | 109.5     | C92-N4-H4N  | 125.8     |
| C47-C53-H53B  | 109.5     | C86-C81-C82 | 121(2)    |
| H53A-C53-H53B | 109.5     | C86-C81-C80 | 131.1(17) |
| C47-C53-H53C  | 109.5     | C82-C81-C80 | 107(2)    |
| H53A-C53-H53C | 109.5     | C83-C82-C81 | 122.8(19) |
| H53B-C53-H53C | 109.5     | C83-C82-H82 | 118.6     |
| O6-C54-C47    | 111.6(6)  | C81-C82-H82 | 118.6     |
| O6-C54-H54A   | 109.3     | C82-C83-C84 | 116.9(12) |
| C47-C54-H54A  | 109.3     | C82-C83-H83 | 121.6     |
| O6-C54-H54B   | 109.3     | C84-C83-H83 | 121.6     |
| C47-C54-H54B  | 109.3     | C87-C84-C85 | 107.1(12) |
| H54A-C54-H54B | 108.0     | C87-C84-C83 | 135.0(12) |
| C51-C55-H55A  | 109.5     | C85-C84-C83 | 117.8(12) |
| C51-C55-H55B  | 109.5     | N4-C85-C86  | 127.4(14) |
| H55A-C55-H55B | 109.5     | N4-C85-C84  | 108.9(12) |
| C51-C55-H55C  | 109.5     | C86-C85-C84 | 123.7(14) |
| H55A-C55-H55C | 109.5     | C81-C86-C85 | 117.4(18) |
| H55B-C55-H55C | 109.5     | C81-C86-H86 | 121.3     |
| C52-C56-C57   | 114.0(6)  | C85-C86-H86 | 121.3     |
| C52-C56-H56A  | 108.8     | C88-C87-C84 | 133.9(13) |
| C57-C56-H56A  | 108.7     | C88-C87-C92 | 118.4(12) |
| C52-C56-H56B  | 108.8     | C84-C87-C92 | 107.7(13) |
| C57-C56-H56B  | 108.8     | C87-C88-C89 | 120.0(12) |
| H56A-C56-H56B | 107.6     | C87-C88-H88 | 120.0     |
| C58-C57-C56   | 111.5(7)  | C89-C88-H88 | 120.0     |
| C56-C57-C12E  | 112.4(8)  | C88-C89-C90 | 120.1(12) |
| C58-C57-H57A  | 109.3     | C88-C89-H89 | 119.9     |
| C56-C57-H57A  | 109.3     | C90-C89-H89 | 119.9     |
| C58-C57-H57B  | 109.3     | C91-C90-C89 | 120.3(13) |
| C56-C57-H57B  | 109.3     | C91-C90-H90 | 119.9     |
| H57A-C57-H57B | 108.0     | C89-C90-H90 | 119.9     |
| C71-O7-C74    | 96.0(5)   | C92-C91-C90 | 119.2(13) |
| C77-O8-H8O    | 109.5     | C92-C91-H91 | 120.4     |
| C85-N4-C92    | 108.5(11) | C90-C91-H91 | 120.4     |
| C85-N4-H4N    | 125.8     | C91-C92-N4  | 130.3(14) |

|                |           |                |           |
|----------------|-----------|----------------|-----------|
| C91-C92-C87    | 122.0(12) | C23B-C22B-C21B | 113(3)    |
| N4-C92-C87     | 107.7(13) | C23B-C22B-H22B | 123.5     |
| C16B-N1B-C23B  | 110.0(18) | C21B-C22B-H22B | 123.5     |
| C16B-N1B-H1BN  | 125.0     | C18B-C23B-C22B | 131(2)    |
| C23B-N1B-H1BN  | 125.0     | C18B-C23B-N1B  | 105.5(19) |
| C17B-C12B-C13B | 118.7(19) | C22B-C23B-N1B  | 123(2)    |
| C17B-C12B-H12B | 120.6     | C77-C70-C76    | 109.1(7)  |
| C13B-C12B-H12B | 120.6     | C77-C70-C71    | 107.9(6)  |
| C14B-C13B-C12B | 120(2)    | C76-C70-C71    | 115.4(8)  |
| C14B-C13B-H13B | 119.9     | C77-C70-C75    | 112.6(7)  |
| C12B-C13B-H13B | 119.9     | C76-C70-C75    | 112.3(7)  |
| C15B-C14B-C13B | 122(2)    | C71-C70-C75    | 99.2(6)   |
| C15B-C14B-H14B | 118.9     | O7-C71-C72     | 101.9(6)  |
| C13B-C14B-H14B | 118.9     | O7-C71-C70     | 102.1(6)  |
| C14B-C15B-C18B | 137(2)    | C72-C71-C70    | 114.0(7)  |
| C14B-C15B-C16B | 117.6(19) | O7-C71-H71     | 112.6     |
| C18B-C15B-C16B | 105(2)    | C72-C71-H71    | 112.6     |
| N1B-C16B-C17B  | 133(2)    | C70-C71-H71    | 112.6     |
| N1B-C16B-C15B  | 107(2)    | C71-C72-C73    | 101.1(6)  |
| C17B-C16B-C15B | 119.7(18) | C71-C72-H72A   | 111.6     |
| C12B-C17B-C16B | 121.5(19) | C73-C72-H72A   | 111.6     |
| C12B-C17B-H17B | 119.2     | C71-C72-H72B   | 111.6     |
| C16B-C17B-H17B | 119.2     | C73-C72-H72B   | 111.5     |
| C23B-C18B-C15B | 111.9(19) | H72A-C72-H72B  | 109.4     |
| C23B-C18B-C19B | 116(2)    | C74-C73-C72    | 101.6(6)  |
| C15B-C18B-C19B | 131.6(18) | C74-C73-H73A   | 111.5     |
| C20B-C19B-C18B | 116.4(19) | C72-C73-H73A   | 111.5     |
| C20B-C19B-H19B | 121.8     | C74-C73-H73B   | 111.5     |
| C18B-C19B-H19B | 121.8     | C72-C73-H73B   | 111.5     |
| C19B-C20B-C21B | 125(3)    | H73A-C73-H73B  | 109.3     |
| C19B-C20B-H20B | 117.6     | O7-C74-C78     | 109.1(7)  |
| C21B-C20B-H20B | 117.6     | O7-C74-C73     | 100.9(6)  |
| C22B-C21B-C20B | 118(4)    | C78-C74-C73    | 113.2(7)  |
| C22B-C21B-C80  | 138(3)    | O7-C74-C75     | 104.5(5)  |
| C20B-C21B-C80  | 104(2)    | C78-C74-C75    | 118.8(7)  |

|               |          |               |          |
|---------------|----------|---------------|----------|
| C73-C74-C75   | 108.5(7) | C81-C80-H80B  | 108.2    |
| C79-C75-C74   | 117.4(7) | C79-C80-H80B  | 108.2    |
| C79-C75-C70   | 116.0(7) | H80A-C80-H80B | 107.3    |
| C74-C75-C70   | 101.0(6) | C94-O9-C97    | 97.5(5)  |
| C79-C75-H75   | 107.2    | C100-O10-H100 | 109.5    |
| C74-C75-H75   | 107.2    | C99-C93-C94   | 115.6(8) |
| C70-C75-H75   | 107.2    | C99-C93-C100  | 107.4(7) |
| C70-C76-H76A  | 109.5    | C94-C93-C100  | 107.1(6) |
| C70-C76-H76B  | 109.5    | C99-C93-C98   | 113.5(6) |
| H76A-C76-H76B | 109.5    | C94-C93-C98   | 100.9(6) |
| C70-C76-H76C  | 109.5    | C100-C93-C98  | 112.2(6) |
| H76A-C76-H76C | 109.5    | O9-C94-C95    | 102.4(7) |
| H76B-C76-H76C | 109.5    | O9-C94-C93    | 100.7(6) |
| O8-C77-C70    | 111.3(7) | C95-C94-C93   | 112.0(6) |
| O8-C77-H77A   | 109.4    | O9-C94-H94    | 113.5    |
| C70-C77-H77A  | 109.4    | C95-C94-H94   | 113.5    |
| O8-C77-H77B   | 109.4    | C93-C94-H94   | 113.5    |
| C70-C77-H77B  | 109.4    | C94-C95-C96   | 101.6(6) |
| H77A-C77-H77B | 108.0    | C94-C95-H95A  | 111.5    |
| C74-C78-H78A  | 109.5    | C96-C95-H95A  | 111.5    |
| C74-C78-H78B  | 109.5    | C94-C95-H95B  | 111.5    |
| H78A-C78-H78B | 109.5    | C96-C95-H95B  | 111.5    |
| C74-C78-H78C  | 109.5    | H95A-C95-H95B | 109.3    |
| H78A-C78-H78C | 109.5    | C97-C96-C95   | 102.1(6) |
| H78B-C78-H78C | 109.5    | C97-C96-H96A  | 111.4    |
| C75-C79-C80   | 113.1(7) | C95-C96-H96A  | 111.4    |
| C75-C79-H79A  | 109.0    | C97-C96-H96B  | 111.4    |
| C80-C79-H79A  | 109.0    | C95-C96-H96B  | 111.4    |
| C75-C79-H79B  | 109.0    | H96A-C96-H96B | 109.2    |
| C80-C79-H79B  | 109.0    | O9-C97-C101   | 109.0(6) |
| H79A-C79-H79B | 107.8    | O9-C97-C96    | 100.2(6) |
| C81-C80-C79   | 116.6(8) | C101-C97-C96  | 114.1(7) |
| C21B-C80-C79  | 114.9(9) | O9-C97-C98    | 102.7(6) |
| C81-C80-H80A  | 108.1    | C101-C97-C98  | 120.4(7) |
| C79-C80-H80A  | 108.1    | C96-C97-C98   | 108.0(6) |

|                |          |                |           |
|----------------|----------|----------------|-----------|
| C102-C98-C97   | 116.5(6) | C102-C103-H10K | 109.0     |
| C102-C98-C93   | 116.7(6) | H10J-C103-H10K | 107.8     |
| C97-C98-C93    | 101.6(6) | C108-N5-C115   | 109.3(12) |
| C102-C98-H98   | 107.1    | C108-N5-H5N    | 125.3     |
| C97-C98-H98    | 107.1    | C115-N5-H5N    | 125.3     |
| C93-C98-H98    | 107.1    | C109-C104-C105 | 120.6(16) |
| C93-C99-H99A   | 109.5    | C109-C104-C103 | 130.4(15) |
| C93-C99-H99B   | 109.5    | C105-C104-C103 | 108.9(13) |
| H99A-C99-H99B  | 109.5    | C106-C105-C104 | 120.0(14) |
| C93-C99-H99C   | 109.5    | C106-C105-H105 | 120.0     |
| H99A-C99-H99C  | 109.5    | C104-C105-H105 | 120.0     |
| H99B-C99-H99C  | 109.5    | C105-C106-C107 | 119.5(13) |
| O10-C100-C93   | 111.8(7) | C105-C106-H106 | 120.2     |
| O10-C100-H10A  | 109.2    | C107-C106-H106 | 120.2     |
| C93-C100-H10A  | 109.2    | C106-C107-C108 | 118.6(14) |
| O10-C100-H10B  | 109.2    | C106-C107-C110 | 136.4(13) |
| C93-C100-H10B  | 109.2    | C108-C107-C110 | 105.0(13) |
| H10A-C100-H10B | 107.9    | C109-C108-N5   | 125.1(14) |
| C97-C101-H10C  | 109.5    | C109-C108-C107 | 125.1(13) |
| C97-C101-H10D  | 109.5    | N5-C108-C107   | 109.9(14) |
| H10C-C101-H10D | 109.5    | C108-C109-C104 | 116.3(15) |
| C97-C101-H10E  | 109.5    | C108-C109-H109 | 121.9     |
| H10C-C101-H10E | 109.5    | C104-C109-H109 | 121.8     |
| H10D-C101-H10E | 109.5    | C111-C110-C115 | 121.7(13) |
| C98-C102-C103  | 113.3(6) | C111-C110-C107 | 130.4(16) |
| C98-C102-H10H  | 108.9    | C115-C110-C107 | 107.9(15) |
| C103-C102-H10H | 108.9    | C110-C111-C112 | 115.8(15) |
| C98-C102-H10I  | 108.9    | C110-C111-H111 | 122.1     |
| C103-C102-H10I | 108.9    | C112-C111-H111 | 122.1     |
| H10H-C102-H10I | 107.7    | C113-C112-C111 | 119.8(16) |
| C12A-C103-C102 | 118.2(8) | C113-C112-H112 | 120.1     |
| C104-C103-C102 | 113.0(7) | C111-C112-H112 | 120.1     |
| C104-C103-H10J | 109.0    | C114-C113-C112 | 122.4(15) |
| C102-C103-H10J | 109.0    | C114-C113-H113 | 118.8     |
| C104-C103-H10K | 109.0    | C112-C113-H113 | 118.8     |

|                |           |                |          |
|----------------|-----------|----------------|----------|
| C113-C114-C115 | 118.2(14) | C21A-C20A-H20A | 117.2    |
| C113-C114-H114 | 120.9     | C20A-C21A-C22A | 120(3)   |
| C115-C114-H114 | 120.9     | C20A-C21A-H21A | 119.9    |
| C114-C115-N5   | 129.9(15) | C22A-C21A-H21A | 119.9    |
| C114-C115-C110 | 122.2(13) | C23A-C22A-C21A | 115(2)   |
| N5-C115-C110   | 108.0(14) | C23A-C22A-H22A | 122.3    |
| C23A-N1A-C16A  | 111(2)    | C21A-C22A-H22A | 122.3    |
| C23A-N1A-H1AN  | 124.7     | N1A-C23A-C22A  | 129(2)   |
| C16A-N1A-H1AN  | 124.7     | N1A-C23A-C18A  | 112(2)   |
| C103-C12A-C17A | 139(2)    | C22A-C23A-C18A | 119(2)   |
| C103-C12A-C13A | 109.7(19) | C117-O11-C120  | 96.7(5)  |
| C17A-C12A-C13A | 112(2)    | C123-O12-H12O  | 109.5    |
| C14A-C13A-C12A | 129(2)    | C131-N6-C138   | 108.9(8) |
| C14A-C13A-H13A | 115.7     | C131-N6-H6N    | 125.5    |
| C12A-C13A-H13A | 115.7     | C138-N6-H6N    | 125.5    |
| C15A-C14A-C13A | 114(2)    | C123-C116-C122 | 110.0(6) |
| C15A-C14A-H14A | 122.8     | C123-C116-C117 | 107.1(6) |
| C13A-C14A-H14A | 122.8     | C122-C116-C117 | 113.6(6) |
| C14A-C15A-C18A | 131(2)    | C123-C116-C121 | 112.5(6) |
| C14A-C15A-C16A | 120(2)    | C122-C116-C121 | 112.4(6) |
| C18A-C15A-C16A | 109(2)    | C117-C116-C121 | 100.9(5) |
| C17A-C16A-N1A  | 133(3)    | O11-C117-C118  | 101.2(5) |
| C17A-C16A-C15A | 123(2)    | O11-C117-C116  | 100.6(5) |
| N1A-C16A-C15A  | 105(2)    | C118-C117-C116 | 112.4(6) |
| C16A-C17A-C12A | 123(3)    | O11-C117-H117  | 113.8    |
| C16A-C17A-H17A | 118.5     | C118-C117-H117 | 113.8    |
| C12A-C17A-H17A | 118.5     | C116-C117-H117 | 113.8    |
| C23A-C18A-C15A | 104(2)    | C117-C118-C119 | 102.8(6) |
| C23A-C18A-C19A | 122(2)    | C117-C118-H11A | 111.2    |
| C15A-C18A-C19A | 134(3)    | C119-C118-H11A | 111.2    |
| C20A-C19A-C18A | 117(2)    | C117-C118-H11B | 111.2    |
| C20A-C19A-H19A | 121.4     | C119-C118-H11B | 111.2    |
| C18A-C19A-H19A | 121.4     | H11A-C118-H11B | 109.1    |
| C19A-C20A-C21A | 126(3)    | C120-C119-C118 | 100.7(6) |
| C19A-C20A-H20A | 117.2     | C120-C119-H11C | 111.6    |



|                |          |                |           |
|----------------|----------|----------------|-----------|
| C118-C119-H11C | 111.6    | C121-C125-H12I | 108.9     |
| C120-C119-H11D | 111.6    | C126-C125-H12I | 108.9     |
| C118-C119-H11D | 111.6    | C121-C125-H12J | 109.0     |
| H11C-C119-H11D | 109.4    | C126-C125-H12J | 108.9     |
| O11-C120-C124  | 106.9(6) | H12I-C125-H12J | 107.8     |
| O11-C120-C121  | 104.4(5) | C127-C126-C125 | 113.5(6)  |
| C124-C120-C121 | 118.7(6) | C127-C126-H12K | 108.9     |
| O11-C120-C119  | 100.7(6) | C125-C126-H12K | 108.9     |
| C124-C120-C119 | 115.0(6) | C127-C126-H12L | 108.9     |
| C121-C120-C119 | 108.9(6) | C125-C126-H12L | 108.9     |
| C125-C121-C120 | 116.2(5) | H12K-C126-H12L | 107.7     |
| C125-C121-C116 | 118.1(6) | C132-C127-C128 | 118.3(8)  |
| C120-C121-C116 | 100.9(5) | C132-C127-C126 | 122.6(8)  |
| C125-C121-H121 | 107.0    | C128-C127-C126 | 119.1(8)  |
| C120-C121-H121 | 107.0    | C129-C128-C127 | 122.5(9)  |
| C116-C121-H121 | 107.0    | C129-C128-H128 | 118.8     |
| C116-C122-H12Q | 109.5    | C127-C128-H128 | 118.8     |
| C116-C122-H12R | 109.5    | C128-C129-C130 | 121.9(9)  |
| H12Q-C122-H12R | 109.5    | C128-C129-H129 | 119.1     |
| C116-C122-H12S | 109.5    | C130-C129-H129 | 119.1     |
| H12Q-C122-H12S | 109.5    | C129-C130-C131 | 118.5(8)  |
| H12R-C122-H12S | 109.5    | C129-C130-C133 | 136.5(8)  |
| O12-C123-C116  | 111.9(6) | C131-C130-C133 | 105.0(8)  |
| O12-C123-H12D  | 109.2    | N6-C131-C132   | 129.4(9)  |
| C116-C123-H12D | 109.2    | N6-C131-C130   | 109.9(8)  |
| O12-C123-H12E  | 109.2    | C132-C131-C130 | 120.7(8)  |
| C116-C123-H12E | 109.2    | C127-C132-C131 | 118.2(8)  |
| H12D-C123-H12E | 107.9    | C127-C132-H132 | 120.9     |
| C120-C124-H12F | 109.5    | C131-C132-H132 | 120.9     |
| C120-C124-H12G | 109.5    | C138-C133-C134 | 118.2(9)  |
| H12F-C124-H12G | 109.5    | C138-C133-C130 | 107.2(8)  |
| C120-C124-H12H | 109.5    | C134-C133-C130 | 134.6(9)  |
| H12F-C124-H12H | 109.5    | C135-C134-C133 | 119.2(10) |
| H12G-C124-H12H | 109.5    | C135-C134-H134 | 120.4     |
| C121-C125-C126 | 113.1(6) | C133-C134-H134 | 120.4     |

|                |           |                |           |
|----------------|-----------|----------------|-----------|
| C134-C135-C136 | 120.9(10) | C157-C156-C161 | 121.8(11) |
| C134-C135-H135 | 119.5     | C157-C156-C153 | 133.6(13) |
| C136-C135-H135 | 119.5     | C161-C156-C153 | 104.5(12) |
| C137-C136-C135 | 121.3(10) | C156-C157-C158 | 117.4(11) |
| C137-C136-H136 | 119.4     | C156-C157-H157 | 121.3     |
| C135-C136-H136 | 119.4     | C158-C157-H157 | 121.3     |
| C138-C137-C136 | 116.3(10) | C159-C158-C157 | 120.3(11) |
| C138-C137-H137 | 121.8     | C159-C158-H158 | 119.8     |
| C136-C137-H137 | 121.8     | C157-C158-H158 | 119.8     |
| C137-C138-N6   | 126.9(10) | C160-C159-C158 | 122.5(12) |
| C137-C138-C133 | 124.1(9)  | C160-C159-H159 | 118.8     |
| N6-C138-C133   | 109.0(9)  | C158-C159-H159 | 118.7     |
| C140-O13-C143  | 96.9(5)   | C159-C160-C161 | 118.5(12) |
| C146-O14-H140  | 109.5     | C159-C160-H160 | 120.7     |
| C161-N7-C154   | 108.6(11) | C161-C160-H160 | 120.7     |
| C161-N7-H7N    | 125.7     | N7-C161-C156   | 112.9(14) |
| C154-N7-H7N    | 125.7     | N7-C161-C160   | 127.7(14) |
| C155-C150-C151 | 116.1(14) | C156-C161-C160 | 119.4(10) |
| C155-C150-C149 | 125.1(10) | C16F-N1F-C23F  | 109(3)    |
| C151-C150-C149 | 118.0(12) | C16F-N1F-H1FN  | 125.7     |
| C152-C151-C150 | 122.5(12) | C23F-N1F-H1FN  | 125.7     |
| C152-C151-H151 | 118.8     | C13F-C12F-C17F | 112(5)    |
| C150-C151-H151 | 118.8     | C13F-C12F-C149 | 119(3)    |
| C151-C152-C153 | 119.5(11) | C17F-C12F-C149 | 129(3)    |
| C151-C152-H152 | 120.3     | C12F-C13F-C14F | 144(3)    |
| C153-C152-H152 | 120.3     | C12F-C13F-H13F | 107.9     |
| C152-C153-C154 | 119.4(11) | C14F-C13F-H13F | 107.8     |
| C152-C153-C156 | 135.3(11) | C13F-C14F-C15F | 98(3)     |
| C154-C153-C156 | 105.3(10) | C13F-C14F-H14F | 131.2     |
| C155-C154-N7   | 131.0(11) | C15F-C14F-H14F | 131.2     |
| C155-C154-C153 | 120.2(11) | C16F-C15F-C18F | 104(4)    |
| N7-C154-C153   | 108.8(11) | C16F-C15F-C14F | 127(4)    |
| C154-C155-C150 | 122.2(12) | C18F-C15F-C14F | 129(4)    |
| C154-C155-H155 | 118.9     | C17F-C16F-N1F  | 133(4)    |
| C150-C155-H155 | 118.9     | C17F-C16F-C15F | 120(4)    |

|                |          |                |          |
|----------------|----------|----------------|----------|
| N1F-C16F-C15F  | 107(3)   | C140-C141-H14T | 111.4    |
| C16F-C17F-C12F | 119(4)   | C142-C141-H14T | 111.4    |
| C16F-C17F-H17F | 120.5    | C140-C141-H14X | 111.4    |
| C12F-C17F-H17F | 120.5    | C142-C141-H14X | 111.4    |
| C23F-C18F-C19F | 124(4)   | H14T-C141-H14X | 109.3    |
| C23F-C18F-C15F | 112(4)   | C141-C142-C143 | 102.0(6) |
| C19F-C18F-C15F | 124(4)   | C141-C142-H14Y | 111.4    |
| C18F-C19F-C20F | 122(4)   | C143-C142-H14Y | 111.4    |
| C18F-C19F-H19F | 119.1    | C141-C142-H14Z | 111.4    |
| C20F-C19F-H19F | 119.1    | C143-C142-H14Z | 111.4    |
| C21F-C20F-C19F | 117(4)   | H14Y-C142-H14Z | 109.2    |
| C21F-C20F-H20F | 121.3    | O13-C143-C147  | 109.1(6) |
| C19F-C20F-H20F | 121.3    | O13-C143-C142  | 100.4(6) |
| C20F-C21F-C22F | 125(4)   | C147-C143-C142 | 114.9(6) |
| C20F-C21F-H21F | 117.7    | O13-C143-C144  | 103.7(5) |
| C22F-C21F-H21F | 117.7    | C147-C143-C144 | 118.4(7) |
| C23F-C22F-C21F | 111(3)   | C142-C143-C144 | 108.1(6) |
| C23F-C22F-H22F | 124.7    | C148-C144-C143 | 117.0(6) |
| C21F-C22F-H22F | 124.6    | C148-C144-C139 | 117.6(6) |
| C18F-C23F-C22F | 122(4)   | C143-C144-C139 | 100.8(6) |
| C18F-C23F-N1F  | 109(4)   | C148-C144-H144 | 106.9    |
| C22F-C23F-N1F  | 129(4)   | C143-C144-H144 | 106.9    |
| C145-C139-C146 | 109.6(6) | C139-C144-H144 | 106.9    |
| C145-C139-C140 | 113.9(7) | C139-C145-H14Q | 109.5    |
| C146-C139-C140 | 106.3(6) | C139-C145-H14R | 109.5    |
| C145-C139-C144 | 113.6(6) | H14Q-C145-H14R | 109.5    |
| C146-C139-C144 | 112.7(6) | C139-C145-H14S | 109.5    |
| C140-C139-C144 | 100.3(5) | H14Q-C145-H14S | 109.5    |
| O13-C140-C141  | 102.7(6) | H14R-C145-H14S | 109.5    |
| O13-C140-C139  | 101.1(6) | O14-C146-C139  | 112.2(7) |
| C141-C140-C139 | 112.5(6) | O14-C146-H14H  | 109.2    |
| O13-C140-H140  | 113.1    | C139-C146-H14H | 109.2    |
| C141-C140-H140 | 113.1    | O14-C146-H14I  | 109.2    |
| C139-C140-H140 | 113.1    | C139-C146-H14I | 109.2    |
| C140-C141-C142 | 101.7(6) | H14H-C146-H14I | 107.9    |

|                |           |                |           |
|----------------|-----------|----------------|-----------|
| C143-C147-H14J | 109.5     | C175-C176-C177 | 115.0(12) |
| C143-C147-H14K | 109.5     | C178-C177-N8   | 132.0(15) |
| H14J-C147-H14K | 109.5     | C178-C177-C176 | 122.6(13) |
| C143-C147-H14L | 109.5     | N8-C177-C176   | 105.4(12) |
| H14J-C147-H14L | 109.5     | C177-C178-C173 | 120.2(16) |
| H14K-C147-H14L | 109.5     | C177-C178-H178 | 119.9     |
| C144-C148-C149 | 113.8(6)  | C173-C178-H178 | 119.9     |
| C144-C148-H14M | 108.8     | C176-C179-C184 | 109.3(13) |
| C149-C148-H14M | 108.8     | C176-C179-C180 | 131.8(12) |
| C144-C148-H14N | 108.8     | C184-C179-C180 | 118.9(12) |
| C149-C148-H14N | 108.8     | C181-C180-C179 | 117.0(12) |
| H14M-C148-H14N | 107.7     | C181-C180-H180 | 121.5     |
| C12F-C149-C148 | 115.4(8)  | C179-C180-H180 | 121.5     |
| C150-C149-C148 | 111.3(6)  | C182-C181-C180 | 122.4(13) |
| C150-C149-H201 | 109.4     | C182-C181-H181 | 118.8     |
| C148-C149-H201 | 109.4     | C180-C181-H181 | 118.8     |
| C150-C149-H202 | 109.4     | C181-C182-C183 | 122.6(12) |
| C148-C149-H202 | 109.4     | C181-C182-H182 | 118.7     |
| H201-C149-H202 | 108.0     | C183-C182-H182 | 118.7     |
| C163-O15-C166  | 95.2(5)   | C184-C183-C182 | 115.3(13) |
| C169-O16-H16O  | 109.5     | C184-C183-H183 | 122.3     |
| C184-N8-C177   | 110.7(11) | C182-C183-H183 | 122.3     |
| C184-N8-H8N    | 124.7     | N8-C184-C183   | 128.6(13) |
| C177-N8-H8N    | 124.7     | N8-C184-C179   | 107.6(12) |
| C178-C173-C174 | 118.1(17) | C183-C184-C179 | 123.7(14) |
| C178-C173-C172 | 126.4(16) | C16C-N1C-C23C  | 109(3)    |
| C174-C173-C172 | 115.4(18) | C16C-N1C-H1CN  | 125.4     |
| C175-C174-C173 | 120.6(15) | C23C-N1C-H1CN  | 125.4     |
| C175-C174-H174 | 119.7     | C13C-C12C-C17C | 116(4)    |
| C173-C174-H174 | 119.7     | C13C-C12C-C172 | 98(3)     |
| C174-C175-C176 | 123.4(13) | C17C-C12C-C172 | 146(4)    |
| C174-C175-H175 | 118.3     | C14C-C13C-C12C | 124(3)    |
| C176-C175-H175 | 118.3     | C14C-C13C-H13C | 118.0     |
| C179-C176-C175 | 138.0(13) | C12C-C13C-H13C | 118.0     |
| C179-C176-C177 | 107.0(12) | C13C-C14C-C15C | 118(3)    |

|                |          |                |          |
|----------------|----------|----------------|----------|
| C13C-C14C-H203 | 120.9    | O15-C163-C162  | 102.4(6) |
| C15C-C14C-H203 | 120.9    | O15-C163-C164  | 102.2(6) |
| C14C-C15C-C16C | 125(3)   | C162-C163-C164 | 114.1(6) |
| C14C-C15C-C18C | 132(2)   | O15-C163-H163  | 112.4    |
| C16C-C15C-C18C | 103(2)   | C162-C163-H163 | 112.4    |
| N1C-C16C-C17C  | 131(3)   | C164-C163-H163 | 112.4    |
| N1C-C16C-C15C  | 111(3)   | C163-C164-C165 | 101.3(6) |
| C17C-C16C-C15C | 116(3)   | C163-C164-H16A | 111.5    |
| C16C-C17C-C12C | 120(3)   | C165-C164-H16A | 111.5    |
| C16C-C17C-H17C | 119.9    | C163-C164-H16B | 111.5    |
| C12C-C17C-H17C | 119.9    | C165-C164-H16B | 111.5    |
| C19C-C18C-C23C | 121(3)   | H16A-C164-H16B | 109.3    |
| C19C-C18C-C15C | 135(3)   | C166-C165-C164 | 101.1(7) |
| C23C-C18C-C15C | 104(2)   | C166-C165-H16C | 111.5    |
| C18C-C19C-C20C | 120(3)   | C164-C165-H16C | 111.5    |
| C18C-C19C-H19C | 119.9    | C166-C165-H16D | 111.5    |
| C20C-C19C-H19C | 119.9    | C164-C165-H16D | 111.5    |
| C21C-C20C-C19C | 118(3)   | H16C-C165-H16D | 109.4    |
| C21C-C20C-H20C | 121.0    | O15-C166-C165  | 100.9(6) |
| C19C-C20C-H20C | 121.0    | O15-C166-C170  | 107.7(7) |
| C22C-C21C-C20C | 124(3)   | C165-C166-C170 | 113.0(8) |
| C22C-C21C-H21C | 118.1    | O15-C166-C167  | 103.4(6) |
| C20C-C21C-H21C | 118.1    | C165-C166-C167 | 109.5(7) |
| C21C-C22C-C23C | 119(3)   | C170-C166-C167 | 120.0(7) |
| C21C-C22C-H22C | 120.4    | C171-C167-C166 | 115.5(7) |
| C23C-C22C-H22C | 120.4    | C171-C167-C162 | 117.5(7) |
| N1C-C23C-C18C  | 112(3)   | C166-C167-C162 | 101.2(6) |
| N1C-C23C-C22C  | 130(3)   | C171-C167-H167 | 107.3    |
| C18C-C23C-C22C | 117(2)   | C166-C167-H167 | 107.3    |
| C168-C162-C163 | 115.8(8) | C162-C167-H167 | 107.3    |
| C168-C162-C169 | 107.7(8) | C162-C168-H16E | 109.5    |
| C163-C162-C169 | 109.4(6) | C162-C168-H16F | 109.5    |
| C168-C162-C167 | 112.6(7) | H16E-C168-H16F | 109.5    |
| C163-C162-C167 | 99.8(7)  | C162-C168-H16G | 109.5    |
| C169-C162-C167 | 111.5(7) | H16E-C168-H16G | 109.5    |

|                |          |                |           |
|----------------|----------|----------------|-----------|
| H16F-C168-H16G | 109.5    | C172-C171-C167 | 113.4(7)  |
| O16-C169-C162  | 111.0(8) | C172-C171-H17G | 108.9     |
| O16-C169-H16H  | 109.4    | C167-C171-H17G | 108.9     |
| C162-C169-H16H | 109.4    | C172-C171-H17H | 108.9     |
| O16-C169-H16I  | 109.4    | C167-C171-H17H | 108.9     |
| C162-C169-H16I | 109.4    | H17G-C171-H17H | 107.7     |
| H16H-C169-H16I | 108.0    | C173-C172-C171 | 115.7(12) |
| C166-C170-H17X | 109.5    | C171-C172-C12C | 114.2(19) |
| C166-C170-H17Y | 109.5    | C173-C172-H17I | 108.4     |
| H17X-C170-H17Y | 109.5    | C171-C172-H17I | 108.4     |
| C166-C170-H17Z | 109.5    | C173-C172-H17J | 108.4     |
| H17X-C170-H17Z | 109.5    | C171-C172-H17J | 108.4     |
| H17Y-C170-H17Z | 109.5    | H17I-C172-H17J | 107.4     |

---

**Table S10.** Anisotropic displacement parameters ( $\text{\AA}^2 \times 10^3$ ) for **5**. The anisotropic displacement factor exponent takes the form:  $-2\pi^2 [ h^2 a^{*2} U^{11} + \dots + 2 h k a^* b^* U^{12} ]$

|      | U <sup>11</sup> | U <sup>22</sup> | U <sup>33</sup> | U <sup>23</sup> | U <sup>13</sup> | U <sup>12</sup> |
|------|-----------------|-----------------|-----------------|-----------------|-----------------|-----------------|
| O1   | 33(3)           | 28(3)           | 77(4)           | -12(2)          | -19(2)          | -4(2)           |
| O2   | 28(2)           | 30(3)           | 65(4)           | -17(2)          | -2(2)           | -3(2)           |
| N1   | 23(3)           | 32(4)           | 40(4)           | -6(3)           | -5(3)           | -4(3)           |
| C12  | 36(3)           | 28(3)           | 43(3)           | -10(3)          | -9(2)           | 2(2)            |
| C13  | 34(4)           | 27(4)           | 43(5)           | -11(3)          | -3(4)           | 5(3)            |
| C14  | 23(4)           | 24(4)           | 40(4)           | -8(3)           | -4(3)           | 1(3)            |
| C15  | 19(3)           | 19(3)           | 38(3)           | -11(3)          | -5(3)           | 1(3)            |
| C16  | 24(4)           | 22(4)           | 37(4)           | -11(3)          | -6(3)           | 0(3)            |
| C17  | 32(4)           | 24(4)           | 42(4)           | -10(3)          | -12(3)          | 3(3)            |
| C18  | 22(4)           | 20(3)           | 38(4)           | -14(3)          | -3(3)           | 1(3)            |
| C19  | 18(4)           | 22(4)           | 35(4)           | -13(3)          | -4(3)           | 7(3)            |
| C20  | 27(4)           | 21(4)           | 37(4)           | -14(3)          | 0(4)            | -1(4)           |
| C21  | 31(4)           | 26(4)           | 44(4)           | -11(3)          | 0(4)            | 0(4)            |
| C22  | 25(4)           | 26(4)           | 42(4)           | -11(3)          | -3(4)           | 3(3)            |
| C23  | 26(4)           | 27(4)           | 41(4)           | -9(3)           | -4(3)           | 1(3)            |
| N1D  | 24(4)           | 26(5)           | 37(4)           | -10(4)          | 0(3)            | -9(4)           |
| C12D | 36(3)           | 28(3)           | 43(3)           | -10(3)          | -9(2)           | 2(2)            |
| C13D | 37(5)           | 24(5)           | 39(5)           | -14(4)          | -11(4)          | 7(4)            |
| C14D | 28(5)           | 21(5)           | 38(5)           | -14(4)          | -8(4)           | 1(4)            |
| C15D | 25(4)           | 23(4)           | 37(4)           | -9(3)           | -5(3)           | -4(4)           |
| C16D | 24(4)           | 21(4)           | 38(4)           | -9(3)           | -3(3)           | 0(4)            |
| C17D | 28(5)           | 24(5)           | 37(5)           | -12(4)          | -2(4)           | -2(4)           |
| C18D | 22(4)           | 25(4)           | 37(4)           | -10(3)          | -1(3)           | -1(4)           |
| C19D | 22(5)           | 23(5)           | 37(5)           | -5(4)           | -1(4)           | 2(4)            |
| C20D | 24(5)           | 27(5)           | 40(5)           | -9(4)           | -1(4)           | 6(4)            |
| C21D | 24(5)           | 29(5)           | 37(5)           | -11(4)          | -1(4)           | 5(4)            |
| C22D | 24(5)           | 22(5)           | 35(5)           | -13(4)          | 0(4)            | 3(4)            |
| C23D | 20(4)           | 23(4)           | 36(4)           | -11(3)          | -2(3)           | 4(4)            |
| C1   | 26(3)           | 32(3)           | 42(4)           | -13(3)          | -9(3)           | 4(2)            |

|     |        |       |       |        |        |        |
|-----|--------|-------|-------|--------|--------|--------|
| C2  | 31(3)  | 30(3) | 54(4) | -14(3) | -11(3) | 1(3)   |
| C3  | 69(6)  | 35(4) | 52(4) | -14(3) | -23(4) | 2(4)   |
| C4  | 51(4)  | 32(4) | 58(4) | -11(3) | -19(3) | 5(3)   |
| C5  | 48(4)  | 31(3) | 56(4) | -13(3) | -21(3) | 1(3)   |
| C6  | 33(3)  | 33(3) | 55(4) | -17(3) | -20(3) | 11(3)  |
| C7  | 42(4)  | 65(6) | 63(6) | -22(5) | -23(4) | 6(4)   |
| C8  | 35(4)  | 26(3) | 52(4) | -12(3) | -7(3)  | 3(3)   |
| C9  | 90(7)  | 33(4) | 83(7) | -10(4) | -48(6) | -12(5) |
| C10 | 42(4)  | 50(4) | 53(4) | -21(3) | -17(3) | 23(4)  |
| C11 | 103(7) | 70(6) | 56(4) | -22(4) | -15(4) | 45(5)  |
| O3  | 24(2)  | 25(2) | 46(3) | -10(2) | -2(2)  | -5(2)  |
| O4  | 21(2)  | 35(3) | 66(4) | -6(2)  | -8(2)  | -2(2)  |
| N2  | 29(3)  | 37(3) | 36(3) | -8(2)  | -6(2)  | -13(3) |
| C24 | 24(3)  | 22(3) | 38(3) | -9(2)  | -1(2)  | -6(2)  |
| C25 | 22(3)  | 26(3) | 35(3) | -6(2)  | -1(2)  | -6(2)  |
| C26 | 38(3)  | 39(4) | 34(3) | -7(3)  | -7(3)  | -7(3)  |
| C27 | 30(3)  | 35(4) | 45(4) | -2(3)  | -11(3) | -12(3) |
| C28 | 18(3)  | 25(3) | 46(3) | -5(2)  | -10(2) | 0(2)   |
| C29 | 19(3)  | 22(3) | 36(3) | -9(2)  | -2(2)  | -7(2)  |
| C30 | 32(3)  | 28(3) | 52(4) | -14(3) | 2(3)   | -1(3)  |
| C31 | 24(3)  | 32(3) | 41(3) | -8(3)  | -7(2)  | -9(3)  |
| C32 | 29(3)  | 28(3) | 59(5) | -6(3)  | 2(3)   | -6(3)  |
| C33 | 26(3)  | 20(3) | 41(3) | -9(2)  | -3(2)  | 1(2)   |
| C34 | 43(4)  | 20(3) | 38(3) | -7(2)  | -3(3)  | 0(3)   |
| C35 | 30(3)  | 20(3) | 42(3) | -9(2)  | -6(2)  | 5(2)   |
| C36 | 29(3)  | 29(4) | 38(3) | -7(3)  | -7(2)  | 3(3)   |
| C37 | 29(3)  | 22(3) | 38(3) | -7(2)  | -11(2) | -7(3)  |
| C38 | 15(3)  | 23(3) | 47(3) | -9(2)  | -8(2)  | -9(2)  |
| C39 | 22(3)  | 29(3) | 42(3) | -9(3)  | -9(2)  | -8(3)  |
| C40 | 33(3)  | 25(3) | 41(3) | -12(3) | -8(3)  | -4(3)  |
| C41 | 29(3)  | 21(3) | 36(3) | -5(2)  | -10(2) | -3(2)  |
| C42 | 25(3)  | 23(3) | 45(3) | -5(3)  | -7(3)  | -4(3)  |
| C43 | 35(3)  | 26(3) | 46(4) | 0(3)   | 2(3)   | -7(3)  |
| C44 | 43(4)  | 35(4) | 41(4) | -7(3)  | -12(3) | 1(3)   |
| C45 | 30(3)  | 26(4) | 53(4) | -8(3)  | -13(3) | 0(3)   |



|      |       |       |       |        |        |        |
|------|-------|-------|-------|--------|--------|--------|
| C46  | 18(3) | 16(3) | 44(3) | -4(2)  | -5(2)  | 0(2)   |
| O5   | 27(2) | 28(3) | 42(3) | -10(2) | -8(2)  | -4(2)  |
| O6   | 21(2) | 43(3) | 61(4) | -22(3) | -10(2) | 2(2)   |
| N3   | 26(3) | 30(3) | 34(3) | -5(3)  | -6(3)  | -10(3) |
| C58  | 27(3) | 32(3) | 40(3) | -13(2) | -4(3)  | -1(2)  |
| C59  | 27(4) | 31(4) | 41(4) | -11(3) | -2(3)  | -2(3)  |
| C60  | 25(4) | 28(4) | 44(4) | -8(3)  | -3(3)  | -10(3) |
| C61  | 25(3) | 21(3) | 38(4) | -8(3)  | -10(3) | -9(3)  |
| C62  | 25(3) | 25(3) | 37(3) | -11(3) | -3(3)  | -8(3)  |
| C63  | 33(4) | 28(4) | 38(4) | -11(3) | -8(3)  | -2(3)  |
| C64  | 30(3) | 26(3) | 37(3) | -10(3) | -9(3)  | -2(3)  |
| C65  | 35(4) | 24(4) | 35(4) | -7(3)  | -13(3) | 5(3)   |
| C66  | 37(4) | 27(4) | 35(4) | -6(3)  | -14(3) | 7(4)   |
| C67  | 37(4) | 24(4) | 34(4) | -11(3) | -12(3) | 6(3)   |
| C68  | 37(4) | 22(4) | 34(4) | -2(3)  | -14(4) | 1(3)   |
| C69  | 37(4) | 23(4) | 34(3) | -6(3)  | -10(3) | -2(3)  |
| N1E  | 27(4) | 29(5) | 40(4) | -7(4)  | -12(4) | -8(4)  |
| C12E | 27(3) | 32(3) | 40(3) | -13(2) | -4(3)  | -1(2)  |
| C13E | 23(5) | 29(5) | 37(5) | -7(4)  | -8(4)  | 4(4)   |
| C14E | 28(5) | 27(5) | 37(4) | -9(4)  | -10(4) | 0(4)   |
| C15E | 27(4) | 24(4) | 36(4) | -5(4)  | -10(3) | -3(4)  |
| C16E | 22(4) | 29(4) | 37(4) | -10(3) | -7(3)  | -1(4)  |
| C17E | 25(5) | 34(5) | 39(4) | -10(4) | -3(4)  | -2(4)  |
| C18E | 30(4) | 27(4) | 34(4) | -6(3)  | -9(3)  | -3(4)  |
| C19E | 31(5) | 18(5) | 36(5) | -1(4)  | -11(4) | 3(4)   |
| C20E | 28(5) | 23(5) | 36(5) | -1(4)  | -11(4) | 10(5)  |
| C21E | 29(5) | 25(5) | 37(5) | -8(4)  | -5(4)  | 7(5)   |
| C22E | 31(5) | 23(5) | 37(5) | -6(4)  | -9(4)  | 4(4)   |
| C23E | 29(4) | 25(4) | 37(4) | -6(4)  | -11(4) | 2(4)   |
| C47  | 27(3) | 36(3) | 37(3) | -9(3)  | -5(2)  | -5(2)  |
| C48  | 20(3) | 32(3) | 37(3) | -9(2)  | -3(2)  | -4(2)  |
| C49  | 25(3) | 45(4) | 34(3) | -4(3)  | 1(2)   | -8(3)  |
| C50  | 28(3) | 43(4) | 40(3) | -13(3) | 0(3)   | -5(3)  |
| C51  | 24(3) | 33(3) | 40(3) | -13(3) | -5(2)  | -5(2)  |
| C52  | 23(3) | 27(3) | 44(3) | -15(3) | -4(2)  | -6(2)  |

|      |       |       |       |        |        |        |
|------|-------|-------|-------|--------|--------|--------|
| C53  | 42(4) | 34(4) | 48(4) | -5(3)  | -11(3) | -5(3)  |
| C54  | 20(3) | 38(4) | 40(3) | -14(3) | -3(2)  | -1(2)  |
| C55  | 30(3) | 37(4) | 47(4) | -14(3) | -9(3)  | 2(3)   |
| C56  | 21(3) | 26(3) | 43(3) | -14(3) | -6(2)  | 5(2)   |
| C57  | 41(4) | 23(3) | 42(3) | -14(3) | -2(3)  | 1(3)   |
| O7   | 22(2) | 31(2) | 40(3) | -6(2)  | -5(2)  | -4(2)  |
| O8   | 34(3) | 32(3) | 90(5) | -21(3) | -17(3) | 4(2)   |
| N4   | 20(3) | 29(4) | 32(3) | -7(3)  | -5(3)  | -12(3) |
| C81  | 34(4) | 31(3) | 38(3) | -7(2)  | -8(3)  | 5(3)   |
| C82  | 40(4) | 32(4) | 36(4) | -6(4)  | -10(4) | 6(4)   |
| C83  | 27(4) | 25(4) | 37(4) | -2(3)  | -9(3)  | -3(3)  |
| C84  | 23(3) | 19(3) | 35(4) | -5(3)  | -6(3)  | -4(3)  |
| C85  | 20(4) | 20(4) | 34(4) | -6(3)  | -4(3)  | -2(3)  |
| C86  | 33(4) | 27(4) | 36(4) | -2(3)  | -4(4)  | 0(4)   |
| C87  | 24(3) | 21(3) | 33(3) | -4(3)  | -3(3)  | -7(3)  |
| C88  | 25(4) | 22(4) | 31(4) | -4(3)  | -2(3)  | -7(3)  |
| C89  | 32(4) | 33(4) | 35(4) | -7(4)  | -3(4)  | -9(4)  |
| C90  | 33(4) | 35(4) | 29(4) | -10(3) | 0(4)   | -7(4)  |
| C91  | 29(4) | 28(4) | 33(4) | -10(3) | 1(4)   | -5(3)  |
| C92  | 26(4) | 21(4) | 33(4) | -8(3)  | -4(3)  | -7(3)  |
| N1B  | 18(4) | 24(4) | 36(4) | -4(3)  | -6(3)  | -5(3)  |
| C12B | 32(5) | 31(5) | 31(5) | -10(4) | -6(4)  | -5(4)  |
| C13B | 31(5) | 35(5) | 33(5) | -11(4) | -4(4)  | -8(5)  |
| C14B | 30(4) | 28(5) | 32(5) | -11(4) | -5(4)  | -6(4)  |
| C15B | 23(4) | 24(4) | 34(4) | -11(3) | -5(3)  | -1(4)  |
| C16B | 22(4) | 24(4) | 33(4) | -8(3)  | -5(3)  | -2(4)  |
| C17B | 27(4) | 27(5) | 32(5) | -8(4)  | -6(4)  | -6(4)  |
| C18B | 20(4) | 25(4) | 35(4) | -5(3)  | -5(3)  | -5(3)  |
| C19B | 22(4) | 26(5) | 36(4) | -6(4)  | -6(4)  | -2(4)  |
| C20B | 29(5) | 29(5) | 36(5) | -4(4)  | -4(4)  | 3(4)   |
| C21B | 34(4) | 31(3) | 38(3) | -7(2)  | -8(3)  | 5(3)   |
| C22B | 32(4) | 25(5) | 34(4) | -9(4)  | -6(4)  | 6(4)   |
| C23B | 24(4) | 22(4) | 33(4) | -5(3)  | -7(3)  | -3(4)  |
| C70  | 27(3) | 31(3) | 49(4) | -11(3) | -12(3) | 5(2)   |
| C71  | 22(3) | 35(3) | 43(3) | -9(3)  | 0(2)   | -2(2)  |

|      |       |       |       |        |        |        |
|------|-------|-------|-------|--------|--------|--------|
| C72  | 45(4) | 40(4) | 39(4) | -10(3) | -3(3)  | 4(3)   |
| C73  | 46(4) | 40(4) | 38(3) | -18(3) | -4(3)  | 8(3)   |
| C74  | 38(3) | 25(3) | 36(3) | -10(2) | -5(2)  | -1(3)  |
| C75  | 31(3) | 36(3) | 44(3) | -11(3) | -12(3) | 9(3)   |
| C76  | 28(4) | 49(6) | 94(7) | -10(5) | -5(4)  | 4(4)   |
| C77  | 43(4) | 32(3) | 61(4) | -22(3) | -22(3) | 6(3)   |
| C78  | 56(5) | 34(4) | 52(5) | -5(3)  | -2(4)  | -10(4) |
| C79  | 47(4) | 42(4) | 44(4) | -11(3) | -13(3) | 15(3)  |
| C80  | 97(7) | 63(5) | 42(4) | -8(3)  | -11(4) | 43(5)  |
| O9   | 30(2) | 31(2) | 45(3) | -10(2) | -10(2) | -9(2)  |
| O10  | 32(3) | 25(2) | 70(4) | -13(2) | 1(2)   | -1(2)  |
| C93  | 25(3) | 25(3) | 46(4) | -6(2)  | -7(3)  | -8(2)  |
| C94  | 35(3) | 34(3) | 40(3) | -4(3)  | -8(3)  | -6(3)  |
| C95  | 62(5) | 40(4) | 35(4) | -7(3)  | -12(3) | -11(3) |
| C96  | 54(4) | 39(4) | 38(4) | -11(3) | -10(3) | -9(3)  |
| C97  | 33(3) | 26(3) | 41(3) | -8(2)  | -11(2) | -5(2)  |
| C98  | 25(3) | 27(3) | 45(3) | -9(2)  | -8(2)  | -8(2)  |
| C99  | 34(4) | 38(5) | 78(6) | -3(4)  | -15(4) | -10(3) |
| C100 | 30(3) | 26(3) | 54(4) | -14(3) | -2(3)  | -6(3)  |
| C101 | 48(4) | 32(4) | 58(5) | -11(3) | -17(4) | 4(3)   |
| C102 | 27(3) | 27(3) | 48(4) | -11(3) | -7(3)  | -11(3) |
| C103 | 69(5) | 43(4) | 44(4) | -8(3)  | -8(3)  | -23(4) |
| N5   | 20(3) | 35(4) | 34(3) | -7(3)  | -3(3)  | 6(3)   |
| C104 | 31(3) | 22(3) | 38(3) | -11(2) | -6(2)  | -10(2) |
| C105 | 30(4) | 28(4) | 40(5) | -6(3)  | -4(3)  | -8(3)  |
| C106 | 21(4) | 23(4) | 37(4) | -10(3) | 0(3)   | -3(3)  |
| C107 | 22(3) | 23(3) | 36(3) | -9(3)  | -7(3)  | -4(3)  |
| C108 | 22(3) | 28(4) | 36(3) | -8(3)  | -4(3)  | -2(3)  |
| C109 | 27(4) | 23(4) | 38(4) | -10(3) | -8(3)  | -4(3)  |
| C110 | 27(4) | 24(4) | 36(3) | -5(3)  | -5(3)  | -1(3)  |
| C111 | 34(4) | 28(4) | 38(4) | -7(4)  | -9(4)  | 0(3)   |
| C112 | 38(5) | 29(4) | 39(4) | -5(4)  | -7(4)  | 1(4)   |
| C113 | 37(4) | 26(4) | 31(4) | 2(3)   | -5(3)  | 0(4)   |
| C114 | 36(4) | 27(4) | 32(4) | -5(3)  | -6(4)  | 4(4)   |
| C115 | 32(4) | 25(4) | 32(4) | -6(3)  | -4(3)  | 0(3)   |

|      |       |       |       |        |        |        |
|------|-------|-------|-------|--------|--------|--------|
| N1A  | 26(4) | 28(4) | 37(4) | -6(4)  | -8(3)  | -1(4)  |
| C12A | 31(3) | 22(3) | 38(3) | -11(2) | -6(2)  | -10(2) |
| C13A | 29(5) | 23(5) | 35(5) | -11(4) | -10(4) | -7(4)  |
| C14A | 29(5) | 26(5) | 37(5) | -7(4)  | -10(4) | -1(4)  |
| C15A | 25(4) | 25(4) | 36(4) | -8(3)  | -6(3)  | 0(3)   |
| C16A | 22(4) | 25(4) | 36(4) | -9(3)  | -6(3)  | -6(4)  |
| C17A | 25(5) | 25(5) | 36(4) | -11(4) | -3(4)  | -10(4) |
| C18A | 28(4) | 28(4) | 37(4) | -6(3)  | -7(3)  | -2(4)  |
| C19A | 32(4) | 26(4) | 37(4) | -8(4)  | -4(4)  | -1(4)  |
| C20A | 37(5) | 31(5) | 40(5) | -6(4)  | -7(4)  | -2(4)  |
| C21A | 37(5) | 32(5) | 38(5) | -7(4)  | -3(4)  | -1(4)  |
| C22A | 34(5) | 27(5) | 38(5) | -6(4)  | -6(4)  | -2(4)  |
| C23A | 28(4) | 25(5) | 37(4) | -8(4)  | -6(4)  | -7(4)  |
| O11  | 23(2) | 27(2) | 36(2) | -10(2) | -4(2)  | -2(2)  |
| O12  | 17(2) | 38(3) | 65(3) | -26(2) | -4(2)  | -1(2)  |
| N6   | 34(3) | 42(4) | 48(3) | -13(3) | -8(2)  | 1(3)   |
| C116 | 25(3) | 27(3) | 38(3) | -10(2) | -3(2)  | -6(2)  |
| C117 | 26(3) | 32(3) | 34(3) | -9(2)  | -4(2)  | -3(2)  |
| C118 | 33(3) | 41(4) | 30(3) | -4(3)  | -6(2)  | 4(3)   |
| C119 | 27(3) | 39(4) | 36(3) | -14(3) | -9(2)  | 7(3)   |
| C120 | 25(3) | 28(3) | 38(3) | -12(2) | -3(2)  | -7(2)  |
| C121 | 22(3) | 20(3) | 37(3) | -10(2) | -5(2)  | 0(2)   |
| C122 | 32(4) | 38(4) | 59(5) | -9(3)  | 2(3)   | -13(3) |
| C123 | 20(3) | 34(3) | 40(3) | -16(3) | -5(2)  | -4(2)  |
| C124 | 24(3) | 29(3) | 49(4) | -16(3) | 2(3)   | -7(3)  |
| C125 | 24(3) | 23(3) | 37(3) | -13(2) | -6(2)  | -4(2)  |
| C126 | 38(4) | 30(3) | 39(3) | -13(3) | -4(3)  | -8(3)  |
| C127 | 31(3) | 21(3) | 39(3) | -11(2) | -5(2)  | -6(2)  |
| C128 | 38(3) | 30(4) | 50(4) | -17(3) | -8(3)  | -5(3)  |
| C129 | 29(3) | 36(4) | 46(4) | -12(3) | -7(3)  | -4(3)  |
| C130 | 26(3) | 25(3) | 54(4) | -18(3) | -6(2)  | -8(3)  |
| C131 | 37(3) | 22(3) | 50(3) | -9(3)  | -13(3) | -12(3) |
| C132 | 41(4) | 20(3) | 45(4) | -12(3) | -16(3) | 3(3)   |
| C133 | 43(4) | 28(3) | 45(3) | -10(3) | -10(3) | -14(3) |
| C134 | 45(4) | 31(4) | 63(4) | -12(3) | -5(3)  | -2(3)  |

|      |       |       |       |        |        |        |
|------|-------|-------|-------|--------|--------|--------|
| C135 | 55(5) | 48(5) | 56(4) | -25(4) | 8(3)   | -2(4)  |
| C136 | 63(5) | 54(5) | 43(4) | -13(4) | -7(3)  | -2(4)  |
| C137 | 43(4) | 47(5) | 53(4) | -14(3) | -16(3) | 2(3)   |
| C138 | 41(4) | 35(4) | 52(4) | -17(3) | -2(3)  | -3(3)  |
| O13  | 23(2) | 19(2) | 46(3) | -7(2)  | -6(2)  | -7(2)  |
| O14  | 22(2) | 35(3) | 65(4) | 1(3)   | -8(2)  | -4(2)  |
| N7   | 26(3) | 34(3) | 42(3) | -8(3)  | -9(3)  | 8(3)   |
| C150 | 26(3) | 24(3) | 43(3) | -8(2)  | -8(2)  | -9(2)  |
| C151 | 22(4) | 29(4) | 46(4) | -4(3)  | -5(3)  | -7(3)  |
| C152 | 21(3) | 26(4) | 47(4) | -8(3)  | -7(3)  | -2(3)  |
| C153 | 21(3) | 22(3) | 45(3) | -7(3)  | -9(3)  | -1(3)  |
| C154 | 21(3) | 21(3) | 45(3) | -5(3)  | -6(3)  | 0(3)   |
| C155 | 25(3) | 22(3) | 48(4) | -8(3)  | -13(3) | -3(3)  |
| C156 | 21(3) | 22(3) | 42(3) | -4(3)  | -13(3) | 2(3)   |
| C157 | 27(3) | 29(4) | 38(4) | -8(3)  | -15(3) | 1(3)   |
| C158 | 38(4) | 29(4) | 38(4) | -5(3)  | -16(3) | 6(3)   |
| C159 | 36(4) | 30(4) | 45(4) | -5(3)  | -11(3) | 2(3)   |
| C160 | 29(4) | 32(4) | 40(4) | -7(3)  | -9(3)  | 4(3)   |
| C161 | 27(3) | 28(3) | 40(3) | -6(3)  | -9(3)  | 5(3)   |
| N1F  | 24(5) | 30(5) | 42(5) | -7(4)  | -9(4)  | -2(4)  |
| C12F | 26(3) | 24(3) | 43(3) | -8(2)  | -8(2)  | -9(2)  |
| C13F | 27(5) | 20(5) | 42(5) | -13(4) | -11(4) | -10(4) |
| C14F | 30(5) | 30(5) | 43(5) | -9(4)  | -10(4) | 1(5)   |
| C15F | 24(4) | 27(4) | 41(4) | -7(4)  | -9(3)  | -1(4)  |
| C16F | 23(4) | 24(5) | 42(4) | -6(4)  | -6(4)  | -6(4)  |
| C17F | 23(5) | 29(5) | 42(5) | -7(4)  | -6(4)  | -9(5)  |
| C18F | 24(4) | 25(4) | 40(4) | -6(4)  | -8(3)  | -1(4)  |
| C19F | 27(5) | 27(5) | 39(5) | -8(4)  | -11(4) | 1(4)   |
| C20F | 29(5) | 29(5) | 39(5) | -8(4)  | -12(4) | 0(5)   |
| C21F | 29(5) | 33(5) | 37(5) | -3(4)  | -10(4) | 3(5)   |
| C22F | 29(5) | 27(5) | 39(5) | -6(5)  | -11(4) | 3(5)   |
| C23F | 25(4) | 27(5) | 39(4) | -6(4)  | -9(4)  | -3(4)  |
| C139 | 21(3) | 22(3) | 48(4) | -9(2)  | -7(2)  | -3(2)  |
| C140 | 31(3) | 23(3) | 43(3) | -12(2) | -10(2) | -6(2)  |
| C141 | 34(3) | 40(4) | 38(3) | -11(3) | -3(3)  | -1(3)  |

|      |       |       |        |        |        |        |
|------|-------|-------|--------|--------|--------|--------|
| C142 | 27(3) | 34(4) | 44(4)  | -9(3)  | -6(3)  | -1(3)  |
| C143 | 26(3) | 25(3) | 41(3)  | -8(2)  | -8(2)  | -7(2)  |
| C144 | 19(3) | 18(3) | 47(3)  | -6(2)  | -6(2)  | -5(2)  |
| C145 | 33(4) | 29(3) | 70(5)  | -18(3) | -16(3) | -2(3)  |
| C146 | 24(3) | 32(4) | 53(4)  | -6(3)  | -7(3)  | -3(3)  |
| C147 | 30(3) | 31(4) | 55(4)  | -11(3) | -11(3) | -13(3) |
| C148 | 19(3) | 26(3) | 52(4)  | -8(3)  | -8(3)  | -3(2)  |
| C149 | 43(4) | 26(3) | 51(4)  | -4(3)  | -14(3) | -4(3)  |
| O15  | 29(2) | 34(2) | 39(3)  | -7(2)  | -5(2)  | -9(2)  |
| O16  | 28(3) | 31(3) | 105(5) | -12(3) | -13(3) | -4(2)  |
| N8   | 25(3) | 27(3) | 37(3)  | -8(3)  | -6(3)  | -1(3)  |
| C173 | 30(4) | 21(3) | 36(3)  | -7(2)  | -8(3)  | -10(3) |
| C174 | 34(4) | 22(4) | 34(4)  | -8(3)  | -8(3)  | -7(3)  |
| C175 | 29(4) | 29(4) | 34(4)  | -9(3)  | -6(3)  | -8(3)  |
| C176 | 26(3) | 22(4) | 36(3)  | -8(3)  | -5(3)  | -5(3)  |
| C177 | 27(4) | 21(3) | 34(3)  | -10(3) | -2(3)  | -7(3)  |
| C178 | 30(4) | 23(4) | 35(4)  | -11(3) | -5(3)  | -7(4)  |
| C179 | 22(3) | 21(3) | 37(3)  | -9(3)  | -2(3)  | -5(3)  |
| C180 | 31(4) | 24(4) | 34(4)  | -8(3)  | -2(3)  | -2(3)  |
| C181 | 32(4) | 31(4) | 33(4)  | -6(4)  | -2(4)  | -1(3)  |
| C182 | 34(4) | 33(4) | 33(4)  | -4(3)  | -6(4)  | 2(4)   |
| C183 | 35(4) | 32(4) | 35(4)  | -3(4)  | -4(3)  | -1(4)  |
| C184 | 28(4) | 29(4) | 37(4)  | -5(3)  | -4(3)  | -6(3)  |
| N1C  | 28(4) | 30(5) | 39(4)  | -9(4)  | -5(3)  | -2(4)  |
| C12C | 30(4) | 21(3) | 36(3)  | -7(2)  | -8(3)  | -10(3) |
| C13C | 27(5) | 24(5) | 35(5)  | -6(4)  | -4(4)  | -9(5)  |
| C14C | 25(5) | 21(5) | 35(5)  | -7(4)  | -3(4)  | -5(4)  |
| C15C | 27(4) | 25(4) | 37(4)  | -7(3)  | -3(3)  | -6(4)  |
| C16C | 27(4) | 22(4) | 35(4)  | -7(4)  | -5(3)  | -6(4)  |
| C17C | 30(5) | 20(5) | 36(5)  | -7(4)  | -7(4)  | -6(4)  |
| C18C | 27(4) | 24(4) | 35(4)  | -4(4)  | -3(3)  | -2(4)  |
| C19C | 30(5) | 28(5) | 36(5)  | -6(4)  | -3(4)  | -2(4)  |
| C20C | 36(5) | 33(6) | 38(5)  | -2(5)  | 0(5)   | 1(5)   |
| C21C | 33(5) | 31(6) | 34(5)  | -1(5)  | 0(4)   | 0(5)   |
| C22C | 30(5) | 26(5) | 36(5)  | -5(4)  | -2(4)  | 0(4)   |

|      |       |       |       |        |        |        |
|------|-------|-------|-------|--------|--------|--------|
| C23C | 27(4) | 23(4) | 36(4) | -6(4)  | -3(3)  | -6(4)  |
| C162 | 31(3) | 32(3) | 50(4) | -9(3)  | -14(3) | -12(3) |
| C163 | 34(3) | 34(3) | 42(3) | -11(3) | -6(3)  | -5(3)  |
| C164 | 45(4) | 42(4) | 40(4) | -5(3)  | -7(3)  | -11(3) |
| C165 | 57(4) | 41(4) | 40(4) | -1(3)  | -10(3) | -14(3) |
| C166 | 44(4) | 31(3) | 40(3) | -4(3)  | -7(3)  | -14(3) |
| C167 | 31(3) | 32(3) | 50(4) | -8(3)  | -11(3) | -16(3) |
| C168 | 34(4) | 66(6) | 87(7) | -18(5) | -9(4)  | -6(4)  |
| C169 | 38(4) | 35(4) | 72(5) | -5(3)  | -21(3) | -7(3)  |
| C170 | 67(5) | 38(4) | 61(5) | -16(4) | -5(4)  | -8(4)  |
| C171 | 41(4) | 39(4) | 44(4) | -8(3)  | -10(3) | -21(3) |
| C172 | 75(5) | 51(5) | 46(4) | -11(3) | -4(3)  | -31(4) |

---

**Table S11.** Hydrogen coordinates ( $\times 10^4$ ) and isotropic displacement parameters ( $\text{\AA}^2 \times 10^3$ ) for **5**.

|      | x     | y     | z    | U(eq) |
|------|-------|-------|------|-------|
| H2O  | -1086 | 11457 | 8633 | 60    |
| H1   | 3218  | 9663  | 4935 | 38    |
| H13  | -631  | 7967  | 6533 | 41    |
| H14  | -739  | 8021  | 5439 | 34    |
| H17  | 2490  | 9255  | 6220 | 37    |
| H19  | -204  | 8353  | 4059 | 29    |
| H20  | 585   | 8761  | 3033 | 33    |
| H21  | 2389  | 9515  | 2807 | 40    |
| H22  | 3351  | 9826  | 3654 | 36    |
| H1D  | -609  | 8072  | 4933 | 35    |
| H13D | 2314  | 9054  | 6711 | 39    |
| H14D | 2946  | 9450  | 5608 | 34    |
| H17D | -606  | 7921  | 6186 | 34    |
| H19D | 3293  | 9762  | 4220 | 33    |
| H20D | 3075  | 9802  | 3141 | 36    |
| H21D | 1443  | 9173  | 2845 | 36    |
| H22D | 13    | 8493  | 3578 | 31    |
| H2   | -1239 | 9985  | 9308 | 45    |
| H3A  | -1291 | 8534  | 9949 | 60    |
| H3B  | 61    | 8668  | 9736 | 60    |
| H4A  | -1352 | 7401  | 9380 | 55    |
| H4B  | 2     | 7537  | 9165 | 55    |
| H6   | 782   | 8533  | 8378 | 46    |
| H7A  | 1155  | 10463 | 9048 | 81    |
| H7B  | 1808  | 10022 | 8487 | 81    |
| H7C  | 1377  | 9388  | 9151 | 81    |
| H8A  | 340   | 10817 | 7810 | 44    |
| H8B  | -984  | 10548 | 7998 | 44    |
| H9A  | -2372 | 7626  | 8415 | 98    |



|      |       |      |       |    |
|------|-------|------|-------|----|
| H9B  | -1202 | 7349 | 8054  | 98 |
| H9C  | -1831 | 8263 | 7775  | 98 |
| H10F | 757   | 9706 | 7380  | 55 |
| H10G | -478  | 9276 | 7357  | 55 |
| H11E | 1622  | 8283 | 7317  | 89 |
| H11F | 398   | 7796 | 7359  | 89 |
| H4O  | 1451  | 6285 | 8669  | 61 |
| H2N  | 4273  | 8065 | 5107  | 40 |
| H25  | 2822  | 5989 | 9460  | 33 |
| H26A | 4153  | 5842 | 10215 | 44 |
| H26B | 4209  | 6934 | 9972  | 44 |
| H27A | 5930  | 5714 | 9737  | 44 |
| H27B | 6005  | 6809 | 9518  | 44 |
| H29  | 5318  | 7560 | 8660  | 30 |
| H30A | 3245  | 8435 | 8641  | 56 |
| H30B | 3837  | 8103 | 9277  | 56 |
| H30C | 2526  | 7848 | 9250  | 56 |
| H31A | 2946  | 7362 | 7909  | 38 |
| H31B | 3046  | 6288 | 8154  | 38 |
| H32A | 6267  | 5000 | 8746  | 59 |
| H32B | 6960  | 5930 | 8456  | 59 |
| H32C | 5997  | 5578 | 8078  | 59 |
| H33A | 4719  | 6853 | 7586  | 34 |
| H33B | 6006  | 7114 | 7666  | 34 |
| H34A | 4165  | 8371 | 7503  | 40 |
| H34B | 5353  | 8670 | 7711  | 40 |
| H36  | 6963  | 9050 | 6945  | 38 |
| H37  | 7802  | 9407 | 5908  | 34 |
| H40  | 4161  | 7936 | 6416  | 38 |
| H42  | 8269  | 9616 | 4531  | 37 |
| H43  | 8141  | 9684 | 3468  | 44 |
| H44  | 6511  | 9116 | 3108  | 47 |
| H45  | 4994  | 8468 | 3843  | 43 |
| H6O  | 4043  | 4445 | 8677  | 60 |
| H3N  | 3161  | 4622 | 5134  | 36 |

|      |       |       |       |    |
|------|-------|-------|-------|----|
| H59  | -629  | 2780  | 6726  | 39 |
| H60  | -743  | 2895  | 5641  | 39 |
| H63  | 2468  | 4140  | 6410  | 38 |
| H65  | -233  | 3305  | 4247  | 37 |
| H66  | 521   | 3771  | 3225  | 39 |
| H67  | 2296  | 4560  | 2978  | 37 |
| H68  | 3281  | 4861  | 3837  | 37 |
| H1EN | -647  | 3038  | 5126  | 37 |
| H13E | 2635  | 4089  | 6652  | 35 |
| H14E | 3104  | 4445  | 5584  | 36 |
| H17E | -424  | 2923  | 6412  | 39 |
| H19E | 3190  | 4693  | 4227  | 34 |
| H20E | 2822  | 4712  | 3165  | 35 |
| H21E | 1034  | 4045  | 2943  | 36 |
| H22E | -189  | 3432  | 3769  | 36 |
| H48  | 2412  | 4316  | 9410  | 35 |
| H49A | 774   | 4041  | 10154 | 42 |
| H49B | 823   | 3093  | 9885  | 42 |
| H50A | -789  | 3470  | 9417  | 44 |
| H50B | -826  | 4425  | 9677  | 44 |
| H52  | 227   | 3216  | 8554  | 37 |
| H53A | 2766  | 2560  | 9170  | 62 |
| H53B | 2300  | 2329  | 8542  | 62 |
| H53C | 1443  | 2313  | 9172  | 62 |
| H54A | 2931  | 3787  | 7855  | 38 |
| H54B | 2712  | 4731  | 8107  | 38 |
| H55A | -852  | 5664  | 8735  | 55 |
| H55B | -1293 | 4928  | 8351  | 55 |
| H55C | -197  | 5557  | 8063  | 55 |
| H56A | 1293  | 4506  | 7531  | 35 |
| H56B | -38   | 4260  | 7590  | 35 |
| H57A | 1762  | 2984  | 7433  | 42 |
| H57B | 438   | 2693  | 7538  | 42 |
| H8O  | -3320 | 9251  | 8647  | 75 |
| H4N  | -5711 | 13056 | 4984  | 32 |

|      |       |       |       |    |
|------|-------|-------|-------|----|
| H82  | -2892 | 13948 | 6786  | 43 |
| H83  | -2100 | 14397 | 5730  | 36 |
| H86  | -5729 | 12889 | 6259  | 39 |
| H88  | -1794 | 14692 | 4352  | 32 |
| H89  | -1956 | 14762 | 3268  | 40 |
| H90  | -3597 | 14152 | 2936  | 39 |
| H91  | -5057 | 13477 | 3685  | 35 |
| H1BN | -1837 | 14522 | 5106  | 31 |
| H12B | -2572 | 14615 | 2935  | 36 |
| H13B | -4424 | 13908 | 3122  | 39 |
| H14B | -5255 | 13433 | 4145  | 35 |
| H17B | -1627 | 14817 | 3794  | 34 |
| H19B | -5835 | 13003 | 5474  | 34 |
| H20B | -5785 | 12837 | 6569  | 38 |
| H22B | -2585 | 14042 | 6348  | 36 |
| H71  | -3491 | 10373 | 9400  | 40 |
| H72A | -3715 | 11470 | 10067 | 49 |
| H72B | -4963 | 11496 | 9816  | 49 |
| H73A | -4564 | 12928 | 9264  | 48 |
| H73B | -3299 | 12886 | 9494  | 48 |
| H75  | -5061 | 12342 | 8465  | 43 |
| H76A | -5790 | 10076 | 9129  | 86 |
| H76B | -6197 | 10777 | 8544  | 86 |
| H76C | -6053 | 11111 | 9200  | 86 |
| H77A | -4471 | 10331 | 7895  | 51 |
| H77B | -3219 | 10514 | 8079  | 51 |
| H78A | -1932 | 13178 | 8539  | 72 |
| H78B | -2961 | 13657 | 8183  | 72 |
| H78C | -2231 | 12894 | 7889  | 72 |
| H79A | -4706 | 11730 | 7462  | 52 |
| H79B | -3420 | 12077 | 7455  | 52 |
| H80A | -5373 | 13228 | 7442  | 81 |
| H80B | -4116 | 13590 | 7488  | 81 |
| H10O | 6027  | 10747 | 1365  | 64 |
| H94  | 6173  | 9634  | 701   | 44 |

|      |      |      |      |    |
|------|------|------|------|----|
| H95A | 6171 | 8499 | 58   | 54 |
| H95B | 4835 | 8477 | 322  | 54 |
| H96A | 5057 | 7049 | 883  | 51 |
| H96B | 6410 | 7102 | 659  | 51 |
| H98  | 4217 | 7697 | 1658 | 38 |
| H99A | 3784 | 9977 | 993  | 75 |
| H99B | 3133 | 9243 | 1548 | 75 |
| H99C | 3553 | 8962 | 877  | 75 |
| H10A | 4616 | 9715 | 2209 | 43 |
| H10B | 5939 | 9541 | 2020 | 43 |
| H10C | 7415 | 6875 | 1640 | 67 |
| H10D | 6257 | 6360 | 1969 | 67 |
| H10E | 6795 | 7142 | 2279 | 67 |
| H10H | 4148 | 8332 | 2645 | 40 |
| H10I | 5439 | 8007 | 2669 | 40 |
| H10J | 3540 | 6788 | 2671 | 62 |
| H10K | 4832 | 6462 | 2695 | 62 |
| H5N  | 1824 | 7170 | 5015 | 36 |
| H105 | 5700 | 6128 | 3517 | 39 |
| H106 | 5735 | 5704 | 4601 | 32 |
| H109 | 2571 | 7319 | 3805 | 35 |
| H111 | 5205 | 5401 | 5964 | 39 |
| H112 | 4284 | 5377 | 7029 | 42 |
| H113 | 2492 | 6069 | 7173 | 38 |
| H114 | 1587 | 6769 | 6327 | 38 |
| H1AN | 5734 | 5574 | 5109 | 36 |
| H13A | 2610 | 7297 | 3475 | 34 |
| H14A | 1995 | 7193 | 4553 | 36 |
| H17A | 5593 | 6035 | 3823 | 33 |
| H19A | 1815 | 6840 | 5892 | 38 |
| H20A | 2132 | 6404 | 6875 | 43 |
| H21A | 3765 | 5676 | 7188 | 43 |
| H22A | 5266 | 5347 | 6397 | 39 |
| H12O | 3472 | 5545 | 1437 | 57 |
| H6N  | 721  | 5565 | 5061 | 48 |

|      |       |      |      |    |
|------|-------|------|------|----|
| H117 | 2131  | 5717 | 657  | 36 |
| H11A | 776   | 6039 | -88  | 42 |
| H11B | 728   | 6972 | 198  | 42 |
| H11C | -1091 | 6604 | 633  | 39 |
| H11D | -1012 | 5638 | 386  | 39 |
| H12I | -375  | 6870 | 1496 | 31 |
| H12Q | 1728  | 7712 | 1534 | 66 |
| H12R | 1093  | 7745 | 908  | 66 |
| H12S | 2408  | 7471 | 902  | 66 |
| H12D | 2033  | 6206 | 2236 | 36 |
| H12E | 1906  | 5279 | 1964 | 36 |
| H12F | -1365 | 4400 | 1343 | 50 |
| H12G | -2012 | 5159 | 1684 | 50 |
| H12H | -1039 | 4564 | 2019 | 50 |
| H12I | 201   | 5561 | 2547 | 32 |
| H12J | -1081 | 5883 | 2472 | 32 |
| H12K | 774   | 7018 | 2654 | 42 |
| H12L | -422  | 7435 | 2468 | 42 |
| H128 | -2028 | 7382 | 3231 | 45 |
| H129 | -2774 | 7245 | 4256 | 44 |
| H132 | 835   | 6037 | 3758 | 41 |
| H134 | -3244 | 6889 | 5647 | 55 |
| H135 | -3070 | 6452 | 6712 | 63 |
| H136 | -1460 | 5660 | 7057 | 63 |
| H137 | 60    | 5342 | 6313 | 55 |
| H14O | 875   | 3791 | 1441 | 63 |
| H7N  | 1798  | 2126 | 5001 | 40 |
| H151 | 5600  | 1095 | 3415 | 39 |
| H152 | 5719  | 707  | 4487 | 37 |
| H155 | 2499  | 2245 | 3751 | 37 |
| H157 | 5289  | 422  | 5872 | 36 |
| H158 | 4438  | 417  | 6937 | 41 |
| H159 | 2679  | 1076 | 7114 | 44 |
| H160 | 1692  | 1750 | 6292 | 40 |
| H1FN | 5736  | 611  | 4963 | 38 |

|      |       |       |      |    |
|------|-------|-------|------|----|
| H13F | 2464  | 2189  | 3455 | 34 |
| H14F | 1712  | 2178  | 4514 | 40 |
| H17F | 5394  | 1086  | 3642 | 37 |
| H19F | 1912  | 1785  | 5717 | 36 |
| H20F | 2091  | 1433  | 6788 | 38 |
| H21F | 3671  | 785   | 7095 | 40 |
| H22F | 5294  | 410   | 6311 | 38 |
| H140 | 2540  | 3981  | 667  | 38 |
| H14T | 4155  | 4022  | -78  | 44 |
| H14X | 4073  | 2944  | 213  | 44 |
| H14Y | 5770  | 4153  | 384  | 42 |
| H14Z | 5710  | 3069  | 656  | 42 |
| H144 | 4718  | 2421  | 1544 | 33 |
| H14Q | 2125  | 2095  | 965  | 63 |
| H14R | 2673  | 1548  | 1567 | 63 |
| H14S | 3455  | 1862  | 910  | 63 |
| H14H | 1994  | 2711  | 2234 | 44 |
| H14I | 2252  | 3771  | 1962 | 44 |
| H14J | 5829  | 4942  | 1305 | 57 |
| H14K | 6293  | 4009  | 1676 | 57 |
| H14L | 5226  | 4498  | 1991 | 57 |
| H14M | 3673  | 3233  | 2555 | 38 |
| H14N | 4998  | 2992  | 2502 | 38 |
| H201 | 3159  | 1658  | 2675 | 48 |
| H202 | 4474  | 1393  | 2567 | 48 |
| H16O | -1647 | -1459 | 1237 | 81 |
| H8N  | 708   | 597   | 4964 | 35 |
| H174 | -2118 | 2262  | 3094 | 36 |
| H175 | -2790 | 2253  | 4118 | 36 |
| H178 | 720   | 903   | 3666 | 34 |
| H180 | -3293 | 1891  | 5476 | 35 |
| H181 | -3106 | 1514  | 6568 | 38 |
| H182 | -1539 | 793   | 6939 | 40 |
| H183 | 36    | 445   | 6242 | 41 |
| H1CN | -3163 | 2059  | 4796 | 38 |

|      |       |      |      |    |
|------|-------|------|------|----|
| H13C | 867   | 1144 | 3357 | 34 |
| H203 | 841   | 751  | 4398 | 32 |
| H17C | -2377 | 2168 | 3548 | 34 |
| H19C | 369   | 597  | 5752 | 37 |
| H20C | -476  | 611  | 6800 | 44 |
| H21C | -2275 | 1253 | 6942 | 40 |
| H22C | -3292 | 1790 | 6121 | 37 |
| H163 | -1610 | 6    | 543  | 43 |
| H16A | -1478 | 1439 | -118 | 51 |
| H16B | -202  | 1372 | 97   | 51 |
| H16C | -603  | 2523 | 651  | 55 |
| H16D | -1903 | 2546 | 473  | 55 |
| H167 | 46    | 1492 | 1429 | 45 |
| H16E | 951   | 676  | 667  | 92 |
| H16F | 684   | -391 | 720  | 92 |
| H16G | 1155  | -19  | 1301 | 92 |
| H16H | -433  | -791 | 2003 | 57 |
| H16I | -1725 | -555 | 1874 | 57 |
| H17X | -3118 | 2374 | 1455 | 82 |
| H17Y | -2087 | 2606 | 1833 | 82 |
| H17Z | -2837 | 1694 | 2081 | 82 |
| H17G | -1532 | 768  | 2475 | 50 |
| H17H | -294  | 326  | 2439 | 50 |
| H17I | 584   | 1658 | 2515 | 69 |
| H17J | -521  | 2243 | 2358 | 69 |

---

**Table S12.** Torsion angles [°] for **5**.

|                 |             |                     |            |
|-----------------|-------------|---------------------|------------|
| C17-C12-C13-C14 | -0.15(18)   | C17D-C12D-C13D-C14D | 0.02(19)   |
| C11-C12-C13-C14 | -172.5(7)   | C11-C12D-C13D-C14D  | 179.2(7)   |
| C12-C13-C14-C15 | 0.1(3)      | C12D-C13D-C14D-C15D | 0.0(3)     |
| C13-C14-C15-C16 | -0.1(4)     | C13D-C14D-C15D-C16D | 0.0(4)     |
| C13-C14-C15-C18 | 179.8(2)    | C13D-C14D-C15D-C18D | -179.9(3)  |
| C23-N1-C16-C15  | 0.0(3)      | C23D-N1D-C16D-C17D  | -180.0(3)  |
| C23-N1-C16-C17  | 179.9(2)    | C23D-N1D-C16D-C15D  | 0.0(3)     |
| C18-C15-C16-N1  | 0.0(3)      | C14D-C15D-C16D-C17D | 0.0(4)     |
| C14-C15-C16-N1  | 179.9(2)    | C18D-C15D-C16D-C17D | 179.9(3)   |
| C18-C15-C16-C17 | -179.8(2)   | C14D-C15D-C16D-N1D  | -180.0(2)  |
| C14-C15-C16-C17 | 0.1(4)      | C18D-C15D-C16D-N1D  | 0.0(3)     |
| N1-C16-C17-C12  | -179.95(19) | N1D-C16D-C17D-C12D  | 179.9(2)   |
| C15-C16-C17-C12 | -0.2(4)     | C15D-C16D-C17D-C12D | 0.0(4)     |
| C13-C12-C17-C16 | 0.2(2)      | C13D-C12D-C17D-C16D | 0.0(3)     |
| C11-C12-C17-C16 | 171.9(8)    | C11-C12D-C17D-C16D  | -178.9(10) |
| C16-C15-C18-C19 | 179.9(3)    | C14D-C15D-C18D-C19D | -0.2(6)    |
| C14-C15-C18-C19 | 0.0(6)      | C16D-C15D-C18D-C19D | 179.9(3)   |
| C16-C15-C18-C23 | -0.1(3)     | C14D-C15D-C18D-C23D | 180.0(3)   |
| C14-C15-C18-C23 | -180.0(3)   | C16D-C15D-C18D-C23D | 0.1(3)     |
| C15-C18-C19-C20 | 180.0(3)    | C15D-C18D-C19D-C20D | -179.9(3)  |
| C23-C18-C19-C20 | -0.1(4)     | C23D-C18D-C19D-C20D | -0.1(4)    |
| C18-C19-C20-C21 | 0.0(4)      | C18D-C19D-C20D-C21D | 0.2(4)     |
| C19-C20-C21-C22 | 0.2(4)      | C19D-C20D-C21D-C22D | -0.2(4)    |
| C20-C21-C22-C23 | -0.2(4)     | C20D-C21D-C22D-C23D | 0.2(4)     |
| C21-C22-C23-N1  | -180.0(2)   | C21D-C22D-C23D-N1D  | 180.0(3)   |
| C21-C22-C23-C18 | 0.1(4)      | C21D-C22D-C23D-C18D | -0.1(4)    |
| C16-N1-C23-C22  | -180.0(3)   | C16D-N1D-C23D-C22D  | -180.0(3)  |
| C16-N1-C23-C18  | -0.1(2)     | C16D-N1D-C23D-C18D  | 0.1(3)     |
| C19-C18-C23-C22 | 0.0(4)      | C19D-C18D-C23D-C22D | 0.1(4)     |
| C15-C18-C23-C22 | 180.0(3)    | C15D-C18D-C23D-C22D | 180.0(3)   |
| C19-C18-C23-N1  | -179.9(2)   | C19D-C18D-C23D-N1D  | -180.0(2)  |
| C15-C18-C23-N1  | 0.1(3)      | C15D-C18D-C23D-N1D  | -0.1(3)    |



|                  |            |                   |           |
|------------------|------------|-------------------|-----------|
| C5-O1-C2-C3      | -57.4(8)   | C17-C12-C11-C12D  | -122(12)  |
| C5-O1-C2-C1      | 60.5(7)    | C13-C12-C11-C10   | -94.0(12) |
| C7-C1-C2-O1      | -162.9(7)  | C17-C12-C11-C10   | 94.2(12)  |
| C8-C1-C2-O1      | 74.3(7)    | C13D-C12D-C11-C12 | 53(12)    |
| C6-C1-C2-O1      | -43.4(7)   | C17D-C12D-C11-C12 | -128(12)  |
| C7-C1-C2-C3      | -54.3(10)  | C13D-C12D-C11-C10 | 90.8(13)  |
| C8-C1-C2-C3      | -177.1(6)  | C17D-C12D-C11-C10 | -90.0(15) |
| C6-C1-C2-C3      | 65.2(8)    | C6-C10-C11-C12    | 174.6(11) |
| O1-C2-C3-C4      | 36.0(9)    | C6-C10-C11-C12D   | 170.7(14) |
| C1-C2-C3-C4      | -73.2(9)   | C28-O3-C25-C26    | -57.3(6)  |
| C2-C3-C4-C5      | -0.1(9)    | C28-O3-C25-C24    | 60.8(6)   |
| C2-O1-C5-C9      | 178.4(8)   | C30-C24-C25-O3    | -164.9(6) |
| C2-O1-C5-C4      | 57.7(7)    | C31-C24-C25-O3    | 73.5(6)   |
| C2-O1-C5-C6      | -53.6(7)   | C29-C24-C25-O3    | -43.3(6)  |
| C3-C4-C5-O1      | -34.7(8)   | C30-C24-C25-C26   | -55.2(8)  |
| C3-C4-C5-C9      | -150.6(10) | C31-C24-C25-C26   | -176.8(6) |
| C3-C4-C5-C6      | 73.9(9)    | C29-C24-C25-C26   | 66.4(7)   |
| O1-C5-C6-C10     | -99.4(8)   | O3-C25-C26-C27    | 33.9(7)   |
| C9-C5-C6-C10     | 20.9(12)   | C24-C25-C26-C27   | -74.6(7)  |
| C4-C5-C6-C10     | 153.6(7)   | C25-C26-C27-C28   | 2.1(7)    |
| O1-C5-C6-C1      | 26.5(7)    | C25-O3-C28-C32    | 178.7(6)  |
| C9-C5-C6-C1      | 146.8(8)   | C25-O3-C28-C27    | 57.1(6)   |
| C4-C5-C6-C1      | -80.6(8)   | C25-O3-C28-C29    | -54.1(6)  |
| C7-C1-C6-C10     | -101.3(9)  | C26-C27-C28-O3    | -36.1(7)  |
| C2-C1-C6-C10     | 135.9(7)   | C26-C27-C28-C32   | -151.6(6) |
| C8-C1-C6-C10     | 21.5(10)   | C26-C27-C28-C29   | 70.6(7)   |
| C7-C1-C6-C5      | 131.9(8)   | O3-C28-C29-C33    | -102.8(6) |
| C2-C1-C6-C5      | 9.1(7)     | C32-C28-C29-C33   | 16.4(9)   |
| C8-C1-C6-C5      | -105.3(7)  | C27-C28-C29-C33   | 152.3(6)  |
| C7-C1-C8-O2      | -61.0(9)   | O3-C28-C29-C24    | 26.6(7)   |
| C2-C1-C8-O2      | 65.9(8)    | C32-C28-C29-C24   | 145.8(6)  |
| C6-C1-C8-O2      | 175.1(6)   | C27-C28-C29-C24   | -78.3(6)  |
| C5-C6-C10-C11    | -87.1(11)  | C30-C24-C29-C33   | -101.0(7) |
| C1-C6-C10-C11    | 154.7(10)  | C31-C24-C29-C33   | 22.9(8)   |
| C13-C12-C11-C12D | 50(12)     | C25-C24-C29-C33   | 137.1(6)  |

|                 |           |                 |             |
|-----------------|-----------|-----------------|-------------|
| C30-C24-C29-C28 | 131.0(7)  | C44-C45-C46-N2  | 178.1(8)    |
| C31-C24-C29-C28 | -105.1(6) | C44-C45-C46-C41 | 2.2(12)     |
| C25-C24-C29-C28 | 9.1(6)    | C39-N2-C46-C45  | -176.9(8)   |
| C30-C24-C31-O4  | -55.8(7)  | C39-N2-C46-C41  | -0.5(9)     |
| C25-C24-C31-O4  | 68.7(7)   | C42-C41-C46-C45 | -3.2(11)    |
| C29-C24-C31-O4  | 177.8(5)  | C38-C41-C46-C45 | 178.1(7)    |
| C28-C29-C33-C34 | -168.1(6) | C42-C41-C46-N2  | -179.8(7)   |
| C24-C29-C33-C34 | 70.7(8)   | C38-C41-C46-N2  | 1.4(8)      |
| C29-C33-C34-C35 | 169.1(6)  | C63-C58-C59-C60 | -0.33(18)   |
| C33-C34-C35-C40 | 80.0(9)   | C57-C58-C59-C60 | -170.1(6)   |
| C33-C34-C35-C36 | -96.2(8)  | C58-C59-C60-C61 | 0.2(3)      |
| C40-C35-C36-C37 | 2.0(12)   | C59-C60-C61-C62 | -0.1(4)     |
| C34-C35-C36-C37 | 178.2(7)  | C59-C60-C61-C64 | 179.7(2)    |
| C35-C36-C37-C38 | -1.4(12)  | C64-C61-C62-N3  | 0.0(3)      |
| C36-C37-C38-C39 | 1.7(11)   | C60-C61-C62-N3  | 179.9(2)    |
| C36-C37-C38-C41 | 176.5(8)  | C64-C61-C62-C63 | -179.7(2)   |
| C46-N2-C39-C38  | -0.7(9)   | C60-C61-C62-C63 | 0.1(4)      |
| C46-N2-C39-C40  | 179.5(8)  | C69-N3-C62-C61  | 0.0(2)      |
| C37-C38-C39-N2  | 177.5(7)  | C69-N3-C62-C63  | 179.8(2)    |
| C41-C38-C39-N2  | 1.6(9)    | C59-C58-C63-C62 | 0.3(3)      |
| C37-C38-C39-C40 | -2.6(12)  | C57-C58-C63-C62 | 169.6(6)    |
| C41-C38-C39-C40 | -178.6(7) | C61-C62-C63-C58 | -0.2(4)     |
| C36-C35-C40-C39 | -2.7(11)  | N3-C62-C63-C58  | -179.92(18) |
| C34-C35-C40-C39 | -178.8(7) | C62-C61-C64-C65 | 179.8(3)    |
| N2-C39-C40-C35  | -177.1(8) | C60-C61-C64-C65 | 0.0(6)      |
| C38-C39-C40-C35 | 3.1(12)   | C62-C61-C64-C69 | -0.1(3)     |
| C39-C38-C41-C42 | 179.8(9)  | C60-C61-C64-C69 | -179.9(3)   |
| C37-C38-C41-C42 | 4.5(16)   | C61-C64-C65-C66 | -180.0(3)   |
| C39-C38-C41-C46 | -1.8(8)   | C69-C64-C65-C66 | -0.1(4)     |
| C37-C38-C41-C46 | -177.1(8) | C64-C65-C66-C67 | 0.1(4)      |
| C46-C41-C42-C43 | 2.3(11)   | C65-C66-C67-C68 | -0.1(4)     |
| C38-C41-C42-C43 | -179.4(9) | C66-C67-C68-C69 | 0.1(4)      |
| C41-C42-C43-C44 | -0.7(13)  | C62-N3-C69-C68  | -180.0(3)   |
| C42-C43-C44-C45 | -0.4(13)  | C62-N3-C69-C64  | -0.1(2)     |
| C43-C44-C45-C46 | -0.4(13)  | C67-C68-C69-N3  | 179.8(2)    |

|                     |           |                    |           |
|---------------------|-----------|--------------------|-----------|
| C67-C68-C69-C64     | -0.1(4)   | C16E-N1E-C23E-C18E | 0.1(2)    |
| C65-C64-C69-N3      | -179.8(2) | C16E-N1E-C23E-C22E | 179.9(3)  |
| C61-C64-C69-N3      | 0.1(3)    | C51-O5-C48-C47     | 60.4(6)   |
| C65-C64-C69-C68     | 0.1(4)    | C51-O5-C48-C49     | -57.1(6)  |
| C61-C64-C69-C68     | -180.0(2) | C54-C47-C48-O5     | 75.2(7)   |
| C17E-C12E-C13E-C14E | 0.06(18)  | C53-C47-C48-O5     | -162.9(6) |
| C57-C12E-C13E-C14E  | 173.4(8)  | C52-C47-C48-O5     | -41.8(6)  |
| C12E-C13E-C14E-C15E | -0.1(3)   | C54-C47-C48-C49    | -176.2(6) |
| C13E-C14E-C15E-C18E | -179.9(3) | C53-C47-C48-C49    | -54.3(8)  |
| C13E-C14E-C15E-C16E | 0.1(4)    | C52-C47-C48-C49    | 66.8(7)   |
| C23E-N1E-C16E-C15E  | -0.1(2)   | O5-C48-C49-C50     | 34.0(7)   |
| C23E-N1E-C16E-C17E  | -179.9(2) | C47-C48-C49-C50    | -74.4(8)  |
| C18E-C15E-C16E-N1E  | 0.0(3)    | C48-C49-C50-C51    | 0.8(8)    |
| C14E-C15E-C16E-N1E  | -179.9(2) | C48-O5-C51-C55     | 179.6(6)  |
| C18E-C15E-C16E-C17E | 179.9(2)  | C48-O5-C51-C50     | 57.3(7)   |
| C14E-C15E-C16E-C17E | -0.1(4)   | C48-O5-C51-C52     | -53.9(6)  |
| C13E-C12E-C17E-C16E | -0.1(3)   | C49-C50-C51-O5     | -35.6(7)  |
| C57-C12E-C17E-C16E  | -172.5(9) | C49-C50-C51-C55    | -152.5(7) |
| N1E-C16E-C17E-C12E  | 179.9(2)  | C49-C50-C51-C52    | 72.0(7)   |
| C15E-C16E-C17E-C12E | 0.1(4)    | O5-C51-C52-C56     | -101.4(7) |
| C14E-C15E-C18E-C19E | -0.1(6)   | C55-C51-C52-C56    | 18.2(9)   |
| C16E-C15E-C18E-C19E | 180.0(3)  | C50-C51-C52-C56    | 152.3(6)  |
| C14E-C15E-C18E-C23E | 180.0(3)  | O5-C51-C52-C47     | 27.6(7)   |
| C16E-C15E-C18E-C23E | 0.0(3)    | C55-C51-C52-C47    | 147.2(6)  |
| C23E-C18E-C19E-C20E | -0.1(4)   | C50-C51-C52-C47    | -78.7(7)  |
| C15E-C18E-C19E-C20E | 180.0(3)  | C54-C47-C52-C56    | 21.7(9)   |
| C18E-C19E-C20E-C21E | 0.1(4)    | C48-C47-C52-C56    | 135.8(6)  |
| C19E-C20E-C21E-C22E | -0.1(4)   | C53-C47-C52-C56    | -102.1(8) |
| C20E-C21E-C22E-C23E | 0.1(4)    | C54-C47-C52-C51    | -105.8(7) |
| C19E-C18E-C23E-C22E | 0.1(4)    | C48-C47-C52-C51    | 8.3(7)    |
| C15E-C18E-C23E-C22E | -179.9(2) | C53-C47-C52-C51    | 130.4(7)  |
| C19E-C18E-C23E-N1E  | 180.0(2)  | C48-C47-C54-O6     | 66.9(8)   |
| C15E-C18E-C23E-N1E  | -0.1(3)   | C53-C47-C54-O6     | -58.0(8)  |
| C21E-C22E-C23E-C18E | -0.1(4)   | C52-C47-C54-O6     | 176.1(6)  |
| C21E-C22E-C23E-N1E  | -179.9(2) | C51-C52-C56-C57    | -166.1(6) |

|                   |             |                     |           |
|-------------------|-------------|---------------------|-----------|
| C47-C52-C56-C57   | 73.6(8)     | C90-C91-C92-N4      | 180.0(2)  |
| C63-C58-C57-C56   | 81.8(7)     | C90-C91-C92-C87     | 0.0(4)    |
| C59-C58-C57-C56   | -108.3(6)   | C85-N4-C92-C91      | 180.0(3)  |
| C63-C58-C57-C12E  | -17(7)      | C85-N4-C92-C87      | -0.1(2)   |
| C59-C58-C57-C12E  | 153(8)      | C88-C87-C92-C91     | 0.0(4)    |
| C52-C56-C57-C58   | 176.0(8)    | C84-C87-C92-C91     | -179.9(3) |
| C52-C56-C57-C12E  | -176.9(12)  | C88-C87-C92-N4      | -180.0(2) |
| C17E-C12E-C57-C58 | -26(7)      | C84-C87-C92-N4      | 0.1(3)    |
| C13E-C12E-C57-C58 | 161(8)      | C17B-C12B-C13B-C14B | -0.05(18) |
| C17E-C12E-C57-C56 | -109.7(9)   | C12B-C13B-C14B-C15B | 0.1(3)    |
| C13E-C12E-C57-C56 | 76.9(9)     | C13B-C14B-C15B-C18B | 180.0(3)  |
| C86-C81-C82-C83   | 0.02(19)    | C13B-C14B-C15B-C16B | -0.1(4)   |
| C80-C81-C82-C83   | 176.0(6)    | C23B-N1B-C16B-C17B  | 180.0(3)  |
| C81-C82-C83-C84   | -0.1(3)     | C23B-N1B-C16B-C15B  | 0.0(2)    |
| C82-C83-C84-C87   | 180.0(3)    | C14B-C15B-C16B-N1B  | -180.0(2) |
| C82-C83-C84-C85   | 0.1(3)      | C18B-C15B-C16B-N1B  | 0.0(3)    |
| C92-N4-C85-C86    | 180.0(3)    | C14B-C15B-C16B-C17B | 0.0(4)    |
| C92-N4-C85-C84    | 0.0(2)      | C18B-C15B-C16B-C17B | -180.0(2) |
| C87-C84-C85-N4    | 0.0(3)      | C13B-C12B-C17B-C16B | 0.0(3)    |
| C83-C84-C85-N4    | 179.9(2)    | N1B-C16B-C17B-C12B  | -180.0(2) |
| C87-C84-C85-C86   | -179.9(3)   | C15B-C16B-C17B-C12B | 0.0(4)    |
| C83-C84-C85-C86   | 0.0(4)      | C14B-C15B-C18B-C23B | 180.0(3)  |
| C82-C81-C86-C85   | 0.1(3)      | C16B-C15B-C18B-C23B | 0.0(3)    |
| C80-C81-C86-C85   | -174.8(8)   | C14B-C15B-C18B-C19B | -0.1(6)   |
| N4-C85-C86-C81    | -179.99(19) | C16B-C15B-C18B-C19B | 179.9(3)  |
| C84-C85-C86-C81   | -0.1(4)     | C23B-C18B-C19B-C20B | -0.1(4)   |
| C85-C84-C87-C88   | -180.0(3)   | C15B-C18B-C19B-C20B | 180.0(3)  |
| C83-C84-C87-C88   | 0.1(6)      | C18B-C19B-C20B-C21B | 0.1(4)    |
| C85-C84-C87-C92   | 0.0(3)      | C19B-C20B-C21B-C22B | 0.0(4)    |
| C83-C84-C87-C92   | -180.0(3)   | C19B-C20B-C21B-C80  | -179.2(7) |
| C84-C87-C88-C89   | 179.9(3)    | C20B-C21B-C22B-C23B | 0.0(4)    |
| C92-C87-C88-C89   | 0.0(4)      | C80-C21B-C22B-C23B  | 178.9(10) |
| C87-C88-C89-C90   | 0.0(4)      | C15B-C18B-C23B-C22B | -180.0(3) |
| C88-C89-C90-C91   | -0.1(4)     | C19B-C18B-C23B-C22B | 0.1(4)    |
| C89-C90-C91-C92   | 0.1(4)      | C15B-C18B-C23B-N1B  | 0.0(3)    |

|                     |           |                   |           |
|---------------------|-----------|-------------------|-----------|
| C19B-C18B-C23B-N1B  | -179.9(2) | C71-C70-C77-O8    | 63.2(8)   |
| C21B-C22B-C23B-C18B | 0.0(4)    | C75-C70-C77-O8    | 171.7(6)  |
| C21B-C22B-C23B-N1B  | -180.0(2) | C74-C75-C79-C80   | -82.8(10) |
| C16B-N1B-C23B-C18B  | 0.0(2)    | C70-C75-C79-C80   | 157.6(9)  |
| C16B-N1B-C23B-C22B  | 180.0(2)  | C86-C81-C80-C21B  | 160(6)    |
| C74-O7-C71-C72      | -57.9(6)  | C82-C81-C80-C21B  | -16(6)    |
| C74-O7-C71-C70      | 60.1(6)   | C86-C81-C80-C79   | 80.4(13)  |
| C77-C70-C71-O7      | 74.8(7)   | C82-C81-C80-C79   | -95.1(12) |
| C76-C70-C71-O7      | -162.9(7) | C22B-C21B-C80-C81 | 166(7)    |
| C75-C70-C71-O7      | -42.7(7)  | C20B-C21B-C80-C81 | -15(6)    |
| C77-C70-C71-C72     | -176.2(7) | C22B-C21B-C80-C79 | -90.1(15) |
| C76-C70-C71-C72     | -53.9(10) | C20B-C21B-C80-C79 | 88.9(12)  |
| C75-C70-C71-C72     | 66.4(8)   | C75-C79-C80-C81   | 175.7(12) |
| O7-C71-C72-C73      | 34.0(8)   | C75-C79-C80-C21B  | 167.4(17) |
| C70-C71-C72-C73     | -75.2(8)  | C97-O9-C94-C95    | -55.9(7)  |
| C71-C72-C73-C74     | 2.0(8)    | C97-O9-C94-C93    | 59.7(6)   |
| C71-O7-C74-C78      | 178.4(6)  | C99-C93-C94-O9    | -165.1(6) |
| C71-O7-C74-C73      | 58.9(6)   | C100-C93-C94-O9   | 75.2(7)   |
| C71-O7-C74-C75      | -53.6(6)  | C98-C93-C94-O9    | -42.3(6)  |
| C72-C73-C74-O7      | -37.1(7)  | C99-C93-C94-C95   | -56.9(9)  |
| C72-C73-C74-C78     | -153.5(7) | C100-C93-C94-C95  | -176.6(7) |
| C72-C73-C74-C75     | 72.4(8)   | C98-C93-C94-C95   | 65.9(8)   |
| O7-C74-C75-C79      | -100.5(7) | O9-C94-C95-C96    | 31.4(8)   |
| C78-C74-C75-C79     | 21.4(11)  | C93-C94-C95-C96   | -75.7(9)  |
| C73-C74-C75-C79     | 152.5(7)  | C94-C95-C96-C97   | 3.9(8)    |
| O7-C74-C75-C70      | 26.7(7)   | C94-O9-C97-C101   | 178.0(6)  |
| C78-C74-C75-C70     | 148.5(7)  | C94-O9-C97-C96    | 57.9(7)   |
| C73-C74-C75-C70     | -80.3(7)  | C94-O9-C97-C98    | -53.3(7)  |
| C77-C70-C75-C79     | 23.3(9)   | C95-C96-C97-O9    | -37.2(8)  |
| C76-C70-C75-C79     | -100.3(9) | C95-C96-C97-C101  | -153.5(7) |
| C71-C70-C75-C79     | 137.2(7)  | C95-C96-C97-C98   | 69.8(8)   |
| C77-C70-C75-C74     | -104.8(7) | O9-C97-C98-C102   | -102.0(6) |
| C76-C70-C75-C74     | 131.6(8)  | C101-C97-C98-C102 | 19.2(9)   |
| C71-C70-C75-C74     | 9.1(7)    | C96-C97-C98-C102  | 152.7(6)  |
| C76-C70-C77-O8      | -62.9(9)  | O9-C97-C98-C93    | 26.0(7)   |

|                     |             |                     |            |
|---------------------|-------------|---------------------|------------|
| C101-C97-C98-C93    | 147.2(7)    | C108-C107-C110-C111 | 180.0(3)   |
| C96-C97-C98-C93     | -79.3(7)    | C106-C107-C110-C115 | 180.0(3)   |
| C99-C93-C98-C102    | -98.7(9)    | C108-C107-C110-C115 | -0.1(3)    |
| C94-C93-C98-C102    | 137.0(6)    | C115-C110-C111-C112 | 0.0(4)     |
| C100-C93-C98-C102   | 23.4(9)     | C107-C110-C111-C112 | 180.0(3)   |
| C99-C93-C98-C97     | 133.5(8)    | C110-C111-C112-C113 | 0.0(4)     |
| C94-C93-C98-C97     | 9.2(7)      | C111-C112-C113-C114 | 0.0(4)     |
| C100-C93-C98-C97    | -104.5(7)   | C112-C113-C114-C115 | -0.1(4)    |
| C99-C93-C100-O10    | -60.6(8)    | C113-C114-C115-N5   | 179.9(2)   |
| C94-C93-C100-O10    | 64.2(8)     | C113-C114-C115-C110 | 0.1(4)     |
| C98-C93-C100-O10    | 174.0(6)    | C108-N5-C115-C114   | -179.9(3)  |
| C97-C98-C102-C103   | -80.4(9)    | C108-N5-C115-C110   | -0.1(2)    |
| C93-C98-C102-C103   | 159.4(7)    | C111-C110-C115-C114 | -0.1(4)    |
| C98-C102-C103-C12A  | 173.9(13)   | C107-C110-C115-C114 | 180.0(2)   |
| C98-C102-C103-C104  | 180.0(9)    | C111-C110-C115-N5   | -179.9(2)  |
| C12A-C103-C104-C109 | -143(8)     | C107-C110-C115-N5   | 0.1(3)     |
| C102-C103-C104-C109 | 82.7(9)     | C104-C103-C12A-C17A | -141(8)    |
| C12A-C103-C104-C105 | 33(8)       | C102-C103-C12A-C17A | -92.9(13)  |
| C102-C103-C104-C105 | -101.8(8)   | C104-C103-C12A-C13A | 35(8)      |
| C109-C104-C105-C106 | -0.16(18)   | C102-C103-C12A-C13A | 82.9(11)   |
| C103-C104-C105-C106 | -176.3(5)   | C103-C12A-C13A-C14A | -177.0(7)  |
| C104-C105-C106-C107 | 0.1(3)      | C17A-C12A-C13A-C14A | 0.00(17)   |
| C105-C106-C107-C108 | -0.1(4)     | C12A-C13A-C14A-C15A | 0.0(3)     |
| C105-C106-C107-C110 | 179.8(3)    | C13A-C14A-C15A-C18A | -180.0(2)  |
| C115-N5-C108-C109   | 179.9(2)    | C13A-C14A-C15A-C16A | 0.0(3)     |
| C115-N5-C108-C107   | 0.0(2)      | C23A-N1A-C16A-C17A  | -179.9(3)  |
| C106-C107-C108-C109 | 0.1(4)      | C23A-N1A-C16A-C15A  | -0.1(2)    |
| C110-C107-C108-C109 | -179.8(3)   | C14A-C15A-C16A-C17A | 0.0(4)     |
| C106-C107-C108-N5   | 180.0(2)    | C18A-C15A-C16A-C17A | 179.9(2)   |
| C110-C107-C108-N5   | 0.0(3)      | C14A-C15A-C16A-N1A  | -179.9(2)  |
| N5-C108-C109-C104   | -179.97(18) | C18A-C15A-C16A-N1A  | 0.0(3)     |
| C107-C108-C109-C104 | -0.1(4)     | N1A-C16A-C17A-C12A  | 179.92(19) |
| C105-C104-C109-C108 | 0.2(3)      | C15A-C16A-C17A-C12A | 0.1(4)     |
| C103-C104-C109-C108 | 175.3(6)    | C103-C12A-C17A-C16A | 175.7(10)  |
| C106-C107-C110-C111 | 0.1(5)      | C13A-C12A-C17A-C16A | 0.0(3)     |

|                     |           |                     |           |
|---------------------|-----------|---------------------|-----------|
| C14A-C15A-C18A-C23A | 180.0(3)  | C124-C120-C121-C125 | 16.4(10)  |
| C16A-C15A-C18A-C23A | 0.0(3)    | C119-C120-C121-C125 | 150.5(6)  |
| C14A-C15A-C18A-C19A | -0.1(5)   | O11-C120-C121-C116  | 26.4(7)   |
| C16A-C15A-C18A-C19A | 180.0(3)  | C124-C120-C121-C116 | 145.4(7)  |
| C23A-C18A-C19A-C20A | -0.1(4)   | C119-C120-C121-C116 | -80.5(7)  |
| C15A-C18A-C19A-C20A | 179.9(3)  | C123-C116-C121-C125 | 23.2(8)   |
| C18A-C19A-C20A-C21A | 0.1(4)    | C122-C116-C121-C125 | -101.7(7) |
| C19A-C20A-C21A-C22A | -0.1(4)   | C117-C116-C121-C125 | 137.0(6)  |
| C20A-C21A-C22A-C23A | 0.0(3)    | C123-C116-C121-C120 | -104.5(6) |
| C16A-N1A-C23A-C22A  | 180.0(2)  | C122-C116-C121-C120 | 130.6(7)  |
| C16A-N1A-C23A-C18A  | 0.1(2)    | C117-C116-C121-C120 | 9.3(7)    |
| C21A-C22A-C23A-N1A  | -179.9(2) | C122-C116-C123-O12  | -56.4(8)  |
| C21A-C22A-C23A-C18A | 0.0(3)    | C117-C116-C123-O12  | 67.6(7)   |
| C15A-C18A-C23A-N1A  | 0.0(3)    | C121-C116-C123-O12  | 177.5(5)  |
| C19A-C18A-C23A-N1A  | 180.0(2)  | C120-C121-C125-C126 | -168.9(6) |
| C15A-C18A-C23A-C22A | -180.0(2) | C116-C121-C125-C126 | 71.1(8)   |
| C19A-C18A-C23A-C22A | 0.0(4)    | C121-C125-C126-C127 | 170.5(6)  |
| C120-O11-C117-C118  | -56.5(6)  | C125-C126-C127-C132 | 84.3(9)   |
| C120-O11-C117-C116  | 59.1(6)   | C125-C126-C127-C128 | -96.5(8)  |
| C123-C116-C117-O11  | 75.6(6)   | C132-C127-C128-C129 | 1.3(11)   |
| C122-C116-C117-O11  | -162.7(6) | C126-C127-C128-C129 | -177.9(7) |
| C121-C116-C117-O11  | -42.2(6)  | C127-C128-C129-C130 | -0.3(12)  |
| C123-C116-C117-C118 | -177.5(6) | C128-C129-C130-C131 | -0.4(11)  |
| C122-C116-C117-C118 | -55.8(8)  | C128-C129-C130-C133 | 178.3(8)  |
| C121-C116-C117-C118 | 64.7(7)   | C138-N6-C131-C132   | 177.7(7)  |
| O11-C117-C118-C119  | 32.1(7)   | C138-N6-C131-C130   | -0.9(9)   |
| C116-C117-C118-C119 | -74.4(7)  | C129-C130-C131-N6   | 178.9(7)  |
| C117-C118-C119-C120 | 3.5(7)    | C133-C130-C131-N6   | -0.2(8)   |
| C117-O11-C120-C124  | 179.7(6)  | C129-C130-C131-C132 | 0.2(10)   |
| C117-O11-C120-C121  | -53.6(6)  | C133-C130-C131-C132 | -178.9(6) |
| C117-O11-C120-C119  | 59.3(6)   | C128-C127-C132-C131 | -1.5(10)  |
| C118-C119-C120-O11  | -38.0(6)  | C126-C127-C132-C131 | 177.7(6)  |
| C118-C119-C120-C124 | -152.6(6) | N6-C131-C132-C127   | -177.6(7) |
| C118-C119-C120-C121 | 71.4(7)   | C130-C131-C132-C127 | 0.8(10)   |
| O11-C120-C121-C125  | -102.5(7) | C129-C130-C133-C138 | -177.7(9) |

|                     |             |                     |            |
|---------------------|-------------|---------------------|------------|
| C131-C130-C133-C138 | 1.2(8)      | C161-C156-C157-C158 | -0.1(4)    |
| C129-C130-C133-C134 | 0.1(15)     | C153-C156-C157-C158 | -179.9(3)  |
| C131-C130-C133-C134 | 179.0(8)    | C156-C157-C158-C159 | 0.0(4)     |
| C138-C133-C134-C135 | -0.9(12)    | C157-C158-C159-C160 | 0.0(4)     |
| C130-C133-C134-C135 | -178.5(8)   | C158-C159-C160-C161 | 0.0(4)     |
| C133-C134-C135-C136 | -1.1(14)    | C154-N7-C161-C156   | -0.1(2)    |
| C134-C135-C136-C137 | 1.4(16)     | C154-N7-C161-C160   | 180.0(2)   |
| C135-C136-C137-C138 | 0.3(15)     | C157-C156-C161-N7   | -179.8(2)  |
| C136-C137-C138-N6   | -179.2(9)   | C153-C156-C161-N7   | 0.1(3)     |
| C136-C137-C138-C133 | -2.4(14)    | C157-C156-C161-C160 | 0.2(4)     |
| C131-N6-C138-C137   | 178.8(8)    | C153-C156-C161-C160 | -180.0(2)  |
| C131-N6-C138-C133   | 1.7(9)      | C159-C160-C161-N7   | 179.8(2)   |
| C134-C133-C138-C137 | 2.8(13)     | C159-C160-C161-C156 | -0.1(4)    |
| C130-C133-C138-C137 | -179.0(8)   | C17F-C12F-C13F-C14F | 0.1(2)     |
| C134-C133-C138-N6   | -180.0(7)   | C149-C12F-C13F-C14F | 178.5(9)   |
| C130-C133-C138-N6   | -1.8(9)     | C12F-C13F-C14F-C15F | 0.0(3)     |
| C155-C150-C151-C152 | -0.36(17)   | C13F-C14F-C15F-C16F | 0.0(3)     |
| C149-C150-C151-C152 | -170.6(5)   | C13F-C14F-C15F-C18F | -179.9(3)  |
| C150-C151-C152-C153 | 0.3(3)      | C23F-N1F-C16F-C17F  | -179.9(3)  |
| C151-C152-C153-C154 | -0.2(3)     | C23F-N1F-C16F-C15F  | -0.1(3)    |
| C151-C152-C153-C156 | 179.6(2)    | C18F-C15F-C16F-C17F | 179.9(3)   |
| C161-N7-C154-C155   | 179.7(3)    | C14F-C15F-C16F-C17F | 0.0(4)     |
| C161-N7-C154-C153   | 0.1(2)      | C18F-C15F-C16F-N1F  | 0.0(3)     |
| C152-C153-C154-C155 | 0.2(4)      | C14F-C15F-C16F-N1F  | -179.9(2)  |
| C156-C153-C154-C155 | -179.7(2)   | N1F-C16F-C17F-C12F  | 179.9(2)   |
| C152-C153-C154-N7   | 179.9(2)    | C15F-C16F-C17F-C12F | 0.1(4)     |
| C156-C153-C154-N7   | 0.0(3)      | C13F-C12F-C17F-C16F | -0.1(3)    |
| N7-C154-C155-C150   | -179.85(19) | C149-C12F-C17F-C16F | -178.3(10) |
| C153-C154-C155-C150 | -0.3(4)     | C16F-C15F-C18F-C23F | 0.0(3)     |
| C151-C150-C155-C154 | 0.4(3)      | C14F-C15F-C18F-C23F | 179.9(3)   |
| C149-C150-C155-C154 | 169.9(5)    | C16F-C15F-C18F-C19F | 180.0(3)   |
| C152-C153-C156-C157 | -0.1(5)     | C14F-C15F-C18F-C19F | -0.1(5)    |
| C154-C153-C156-C157 | 179.8(3)    | C23F-C18F-C19F-C20F | 0.0(5)     |
| C152-C153-C156-C161 | -179.9(3)   | C15F-C18F-C19F-C20F | -180.0(3)  |
| C154-C153-C156-C161 | 0.0(3)      | C18F-C19F-C20F-C21F | 0.0(4)     |



|                     |           |                     |            |
|---------------------|-----------|---------------------|------------|
| C19F-C20F-C21F-C22F | -0.1(4)   | C140-C139-C144-C148 | 135.9(6)   |
| C20F-C21F-C22F-C23F | 0.1(4)    | C145-C139-C144-C143 | 129.4(7)   |
| C19F-C18F-C23F-C22F | 0.0(5)    | C146-C139-C144-C143 | -105.2(7)  |
| C15F-C18F-C23F-C22F | 180.0(3)  | C140-C139-C144-C143 | 7.5(7)     |
| C19F-C18F-C23F-N1F  | 180.0(2)  | C145-C139-C146-O14  | -57.2(8)   |
| C15F-C18F-C23F-N1F  | -0.1(3)   | C140-C139-C146-O14  | 66.3(7)    |
| C21F-C22F-C23F-C18F | 0.0(4)    | C144-C139-C146-O14  | 175.2(5)   |
| C21F-C22F-C23F-N1F  | -180.0(2) | C143-C144-C148-C149 | -166.7(6)  |
| C16F-N1F-C23F-C18F  | 0.1(3)    | C139-C144-C148-C149 | 73.0(8)    |
| C16F-N1F-C23F-C22F  | -180.0(3) | C13F-C12F-C149-C150 | 133(10)    |
| C143-O13-C140-C141  | -56.8(7)  | C17F-C12F-C149-C150 | -49(10)    |
| C143-O13-C140-C139  | 59.6(6)   | C13F-C12F-C149-C148 | 79.5(11)   |
| C145-C139-C140-O13  | -163.1(6) | C17F-C12F-C149-C148 | -102.4(10) |
| C146-C139-C140-O13  | 76.2(7)   | C155-C150-C149-C12F | -44(10)    |
| C144-C139-C140-O13  | -41.3(7)  | C151-C150-C149-C12F | 125(10)    |
| C145-C139-C140-C141 | -54.1(8)  | C155-C150-C149-C148 | 84.8(7)    |
| C146-C139-C140-C141 | -174.9(6) | C151-C150-C149-C148 | -105.8(6)  |
| C144-C139-C140-C141 | 67.6(7)   | C144-C148-C149-C12F | -178.8(15) |
| O13-C140-C141-C142  | 33.5(7)   | C144-C148-C149-C150 | 175.4(8)   |
| C139-C140-C141-C142 | -74.4(7)  | C178-C173-C174-C175 | 3(3)       |
| C140-C141-C142-C143 | 1.7(8)    | C172-C173-C174-C175 | 178.3(13)  |
| C140-O13-C143-C147  | 178.0(6)  | C173-C174-C175-C176 | -2.2(19)   |
| C140-O13-C143-C142  | 56.9(6)   | C174-C175-C176-C179 | -178.3(13) |
| C140-O13-C143-C144  | -54.9(6)  | C174-C175-C176-C177 | 2.4(16)    |
| C141-C142-C143-O13  | -35.6(7)  | C184-N8-C177-C178   | -178.0(14) |
| C141-C142-C143-C147 | -152.5(7) | C184-N8-C177-C176   | -0.1(12)   |
| C141-C142-C143-C144 | 72.7(7)   | C179-C176-C177-C178 | 176.8(11)  |
| O13-C143-C144-C148  | -101.0(7) | C175-C176-C177-C178 | -3.7(17)   |
| C147-C143-C144-C148 | 20.0(10)  | C179-C176-C177-N8   | -1.3(12)   |
| C142-C143-C144-C148 | 153.0(6)  | C175-C176-C177-N8   | 178.2(9)   |
| O13-C143-C144-C139  | 27.8(7)   | N8-C177-C178-C173   | -177.8(15) |
| C147-C143-C144-C139 | 148.8(7)  | C176-C177-C178-C173 | 5(2)       |
| C142-C143-C144-C139 | -78.2(7)  | C174-C173-C178-C177 | -4(3)      |
| C145-C139-C144-C148 | -102.2(8) | C172-C173-C178-C177 | -179.0(16) |
| C146-C139-C144-C148 | 23.2(8)   | C175-C176-C179-C184 | -177.1(14) |

|                     |            |                     |           |
|---------------------|------------|---------------------|-----------|
| C177-C176-C179-C184 | 2.2(13)    | C23C-C18C-C19C-C20C | 0(4)      |
| C175-C176-C179-C180 | 3(2)       | C15C-C18C-C19C-C20C | 176(3)    |
| C177-C176-C179-C180 | -177.5(11) | C18C-C19C-C20C-C21C | -2(4)     |
| C176-C179-C180-C181 | -179.4(12) | C19C-C20C-C21C-C22C | 2(4)      |
| C184-C179-C180-C181 | 1.0(16)    | C20C-C21C-C22C-C23C | 0(4)      |
| C179-C180-C181-C182 | -2.2(18)   | C16C-N1C-C23C-C18C  | -2(3)     |
| C180-C181-C182-C183 | 2(2)       | C16C-N1C-C23C-C22C  | 173(2)    |
| C181-C182-C183-C184 | 0.4(19)    | C19C-C18C-C23C-N1C  | 177(2)    |
| C177-N8-C184-C183   | 177.7(12)  | C15C-C18C-C23C-N1C  | 0(3)      |
| C177-N8-C184-C179   | 1.4(13)    | C19C-C18C-C23C-C22C | 2(4)      |
| C182-C183-C184-N8   | -177.4(12) | C15C-C18C-C23C-C22C | -176(2)   |
| C182-C183-C184-C179 | -1.6(19)   | C21C-C22C-C23C-N1C  | -176(2)   |
| C176-C179-C184-N8   | -2.2(14)   | C21C-C22C-C23C-C18C | -1(4)     |
| C180-C179-C184-N8   | 177.5(9)   | C166-O15-C163-C162  | 60.8(6)   |
| C176-C179-C184-C183 | -178.8(12) | C166-O15-C163-C164  | -57.6(6)  |
| C180-C179-C184-C183 | 1.0(18)    | C168-C162-C163-O15  | -164.1(7) |
| C17C-C12C-C13C-C14C | 5(6)       | C169-C162-C163-O15  | 74.0(8)   |
| C172-C12C-C13C-C14C | -175(3)    | C167-C162-C163-O15  | -43.1(6)  |
| C12C-C13C-C14C-C15C | -5(5)      | C168-C162-C163-C164 | -54.5(10) |
| C13C-C14C-C15C-C16C | 1(4)       | C169-C162-C163-C164 | -176.4(7) |
| C13C-C14C-C15C-C18C | 180(3)     | C167-C162-C163-C164 | 66.6(8)   |
| C23C-N1C-C16C-C17C  | 174(3)     | O15-C163-C164-C165  | 33.1(7)   |
| C23C-N1C-C16C-C15C  | 4(3)       | C162-C163-C164-C165 | -76.6(9)  |
| C14C-C15C-C16C-N1C  | 175(2)     | C163-C164-C165-C166 | 3.4(8)    |
| C18C-C15C-C16C-N1C  | -4(3)      | C163-O15-C166-C165  | 59.7(7)   |
| C14C-C15C-C16C-C17C | 3(4)       | C163-O15-C166-C170  | 178.3(7)  |
| C18C-C15C-C16C-C17C | -176(2)    | C163-O15-C166-C167  | -53.6(7)  |
| N1C-C16C-C17C-C12C  | -174(3)    | C164-C165-C166-O15  | -38.7(8)  |
| C15C-C16C-C17C-C12C | -4(4)      | C164-C165-C166-C170 | -153.5(7) |
| C13C-C12C-C17C-C16C | 0(5)       | C164-C165-C166-C167 | 69.9(8)   |
| C172-C12C-C17C-C16C | -180(5)    | O15-C166-C167-C171  | -100.6(7) |
| C14C-C15C-C18C-C19C | 6(5)       | C165-C166-C167-C171 | 152.5(6)  |
| C16C-C15C-C18C-C19C | -175(3)    | C170-C166-C167-C171 | 19.4(9)   |
| C14C-C15C-C18C-C23C | -177(2)    | O15-C166-C167-C162  | 27.4(7)   |
| C16C-C15C-C18C-C23C | 2(3)       | C165-C166-C167-C162 | -79.5(7)  |

|                     |           |                     |           |
|---------------------|-----------|---------------------|-----------|
| C170-C166-C167-C162 | 147.4(7)  | C162-C167-C171-C172 | 152.1(8)  |
| C168-C162-C167-C171 | -101.1(9) | C178-C173-C172-C171 | 91(2)     |
| C163-C162-C167-C171 | 135.6(7)  | C174-C173-C172-C171 | -84(2)    |
| C169-C162-C167-C171 | 20.1(9)   | C178-C173-C172-C12C | 170(25)   |
| C168-C162-C167-C166 | 132.2(8)  | C174-C173-C172-C12C | -5(22)    |
| C163-C162-C167-C166 | 8.8(7)    | C167-C171-C172-C173 | 164.0(12) |
| C169-C162-C167-C166 | -106.7(7) | C167-C171-C172-C12C | 157(2)    |
| C168-C162-C169-O16  | -62.8(9)  | C13C-C12C-C172-C173 | -2(21)    |
| C163-C162-C169-O16  | 63.8(9)   | C17C-C12C-C172-C173 | 177(29)   |
| C167-C162-C169-O16  | 173.2(6)  | C13C-C12C-C172-C171 | 102(3)    |
| C166-C167-C171-C172 | -88.5(9)  | C17C-C12C-C172-C171 | -79(7)    |

---

**Table S13.** Hydrogen bonds for **5** [Å and °].

| D-H...A          | d(D-H) | d(H...A) | d(D...A) | <(DHA) |
|------------------|--------|----------|----------|--------|
| O2-H2O...O7      | 0.84   | 1.97     | 2.805(7) | 175.3  |
| O4-H4O...O5      | 0.84   | 1.94     | 2.776(8) | 174.3  |
| O6-H6O...O3      | 0.84   | 1.95     | 2.789(8) | 175.0  |
| O8-H8O...O1      | 0.84   | 1.91     | 2.740(9) | 170.0  |
| O10-H10O...O15#1 | 0.84   | 1.95     | 2.784(7) | 173.1  |
| O12-H12O...O13   | 0.84   | 1.98     | 2.814(8) | 176.5  |
| O14-H14O...O11   | 0.84   | 1.94     | 2.776(8) | 175.1  |
| O16-H16O...O9#2  | 0.84   | 1.95     | 2.765(8) | 163.2  |

Symmetry transformations used to generate equivalent atoms:

#1 x+1,y+1,z    #2 x-1,y-1,z

**Figure S1.** View of molecule 2 of **5** showing the atom labeling scheme. Displacement ellipsoids are scaled to the 50% probability level.

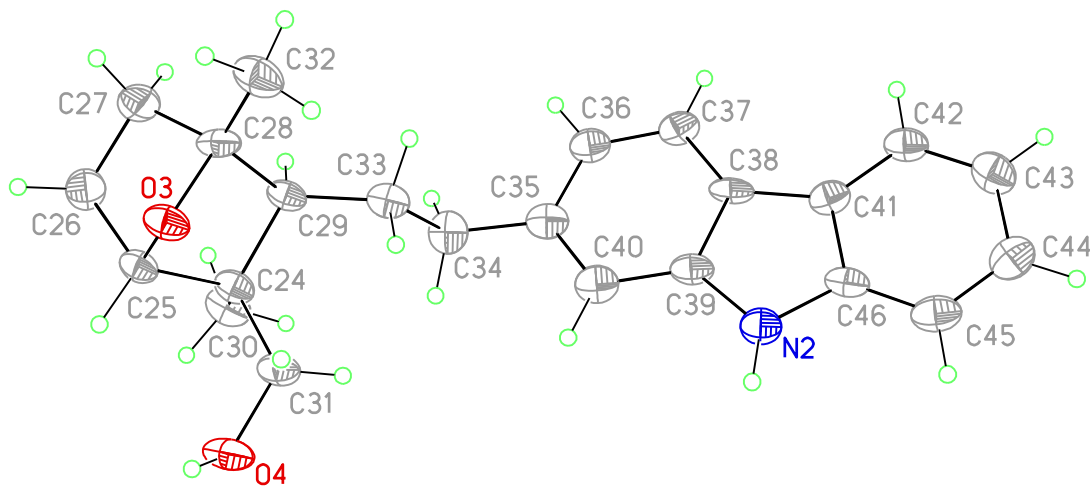

**Figure S2.** View of molecule 1 of **5** showing the partial atom labeling scheme. Displacement ellipsoids are scaled to the 50% probability level. The disorder of the carbazole group can be seen in the figure.

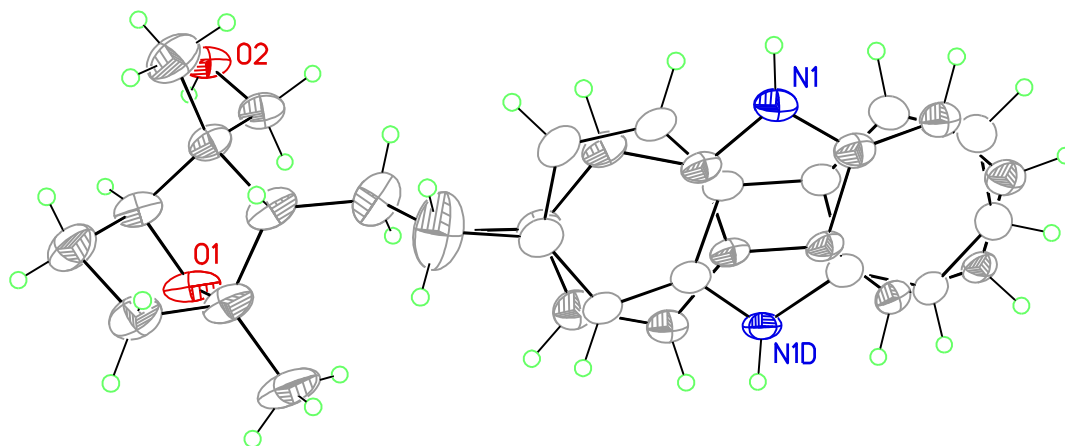

## References

- (1) See Supporting Information of: Feng, J.; Garza, V. J.; Krische, M. J. *J. Am. Chem. Soc.* **2014**, *136*, 8911.
- (2) Broka, C. A.; Carter, D. S.; Dillon, M. P.; Hawley, R. C.; Jahangir, A.; Lin, C. J. J.; Parish, D. W. U.S. Patent US 2005/0209260 A1, September 22, 2005.
- (3) Yan, D.; Xiang, Y.; Li, K.; Chen, Y.; Yang, Z.; Guo, D. *J. Mol. Struct.* **2014**, *1074*, 487.
- (4) **ent-4** was synthesized from **1** and the corresponding (*S*)-Ir-catalyst by following the same procedure shown in the synthesis of oridamycin A in similar yield and selectivity.
- (5) Balogh, V.; Fétizon, M.; Golfier, M. *J. Org. Chem.* **1971**, *36*, 1339.
- (6) See supporting information of: Iwasaki, K.; Wan, K. K.; Oppedisano, A.; Crossley, S. W. M.; Shenvi, R. A. *J. Am. Chem. Soc.* **2014**, *136*, 1300.
- (7) Takada, K.; Kajiwara, H.; Imamura, N. *J. Nat. Prod.* **2010**, *73*, 698.
- (8) Meng, Z.; Yu, H.; Li, L.; Tao, W.; Chen, H.; Wan, M.; Yang, P.; Edmonds, D. J.; Zhong, J.; Li, A. *Nat. Commun.* **2015**, *6*, 6096.
- (9) Trotta, A. H. *Org. Lett.* **2015**, *17*, 3358.
- (10) Shishido, K.; Nakano, K.; Wariishi, N.; Tateishi, H.; Omodani, T.; Shibuya, M.; Goto, K.; Ono, Y.; Takaishi, Y. *Phytochemistry* **1994**, *35*, 731.
- (11) Wang, B.-L.; Gao, H.-T.; Li, W.-D. *Z. J. Org. Chem.* **2015**, *80*, 5296.
- (12) Agilent Technologies (2013). Agilent Technologies UK Ltd., Oxford, UK, SuperNova CCD System, CrysAlicPro Software System, 1.171.37.31.
- (13) Palatinus, L.; Chapuis, G. *J. Appl. Cryst.* **2007**, *40*, 786.
- (14) Sheldrick, G. M. *Acta Cryst.* **2008**, *A64*, 112.
- (15) Spek, A. L. (1998). PLATON, A Multipurpose Crystallographic Tool. Utrecht University, the Netherlands.
- (16) Farrugia, L. J. *J. Appl. Cryst.* **1999**, *32*, 837.
- (17)  $R_w(F^2) = \{\sum w(|F_o|^2 - |F_c|^2)^2 / \sum w(|F_o|^4)\}^{1/2}$  where *w* is the weight given each reflection.  $R(F) = \sum(|F_o| - |F_c|) / \sum |F_o|$  for reflections with  $F_o > 4(\sigma(F_o))$ .  $S = [\sum w(|F_o|^2 - |F_c|^2)^2 / (n - p)]^{1/2}$ , where *n* is the number of reflections and *p* is the number of refined parameters.
- (18) Wilson, A. J. C. *International Tables for X-ray Crystallography*; Kluwer Academic Press: Boston, 1992, Vol. C, Tables 4.2.6.8 and 6.1.1.4.
- (19) Sheldrick, G. M. (1994). SHELXTL/PC (Version 5.03). Siemens Analytical X-ray Instruments, Inc., Madison, Wisconsin, USA.
